1           **SARS-CoV-2 induces double-stranded RNA-mediated innate immune responses in**  
2                           **respiratory epithelial derived cells and cardiomyocytes**

3  
4   Yize Li<sup>a,z,\*,#</sup>, David M Renner<sup>a,z,\*</sup>, Courtney E Comar<sup>a,z,\*</sup>, Jillian N Whelan<sup>a,z,\*</sup>, Hanako M Reyes<sup>a,z</sup>  
5   Fabian Leonardo Cardenas-Diaz<sup>b,y</sup>, Rachel Truitt<sup>b,x</sup>, Li Hui Tan<sup>c</sup>, Beihua Dong<sup>d</sup>, Konstantinos  
6   Dionysios Alysandratos<sup>e</sup>, Jessie Huang<sup>e</sup>, James N. Palmer<sup>c</sup>, Nithin D. Adappa<sup>c</sup>, Michael A.  
7   Kohanski<sup>c</sup>, Darrell N. Kotton<sup>e</sup>, Robert H Silverman<sup>d</sup>, Wenli Yang<sup>b</sup>, Edward Morrissey<sup>b,y</sup>, Noam A.  
8   Cohen<sup>c,f,g</sup>, Susan R Weiss<sup>a,z,#,^</sup>

9  
10   Departments of Microbiology<sup>a</sup>, Medicine<sup>b</sup>, Otorhinolaryngology<sup>c</sup>, Institute for Regenerative  
11   Medicine<sup>x</sup>, Penn Center for Research on Coronaviruses and Other Emerging Pathogens<sup>z</sup>, Penn-  
12   CHOP Lung Biology Institute<sup>y</sup>, Perlman School of Medicine at the University of Pennsylvania,  
13   Philadelphia, PA, 19104

14   <sup>d</sup>Department of Cancer Biology, Lerner Research Institute, Cleveland Clinic, Cleveland, OH  
15   44195 USA

16   <sup>e</sup>Department of Medicine, the Pulmonary Center, Center for Regenerative Medicine Boston  
17   University School of Medicine, Boston, MA 02118, USA

18   <sup>f</sup>Corporal Michael J. Crescenz VA Medical Center, Philadelphia PA, 19104

19   <sup>g</sup>Monell Chemical Senses Center, Philadelphia, PA, 19104

20  
21   #Address correspondence to: Susan R. Weiss, [weissr@penmedicine.upenn.edu](mailto:weissr@penmedicine.upenn.edu) or Yize Li  
22   yizeli@penmedicine.upenn.edu

23  
24   \* These authors contributed equally to this work

25  
26   **Keywords:** SARS-CoV-2; interferon; interferon signaling genes; OAS-RNase L; PKR

## 27 **Summary**

28 Coronaviruses are adept at evading host antiviral pathways induced by viral double-stranded  
29 RNA, including interferon (IFN) signaling, oligoadenylate synthetase–ribonuclease L (OAS-  
30 RNase L), and protein kinase R (PKR). While dysregulated or inadequate IFN responses have  
31 been associated with severe coronavirus infection, the extent to which the recently emerged  
32 SARS-CoV-2 activates or antagonizes these pathways is relatively unknown. We found that  
33 SARS-CoV-2 infects patient-derived nasal epithelial cells, present at the initial site of infection,  
34 induced pluripotent stem cell-derived alveolar type 2 cells (iAT2), the major cell type infected in  
35 the lung, and cardiomyocytes (iCM), consistent with cardiovascular consequences of COVID-19  
36 disease. Robust activation of IFN or OAS-RNase L is not observed in these cell types, while PKR  
37 activation is evident in iAT2 and iCM. In SARS-CoV-2 infected Calu-3 and A549<sup>ACE2</sup> lung-derived  
38 cell lines, IFN induction remains relatively weak; however activation of OAS-RNase L and PKR is  
39 observed. This is in contrast to MERS-CoV, which effectively inhibits IFN signaling as well as  
40 OAS-RNase L and PKR pathways, but similar to mutant MERS-CoV lacking innate immune  
41 antagonists. Remarkably, both OAS-RNase L and PKR are activated in *MAVS* knockout A549<sup>ACE2</sup>  
42 cells, demonstrating that SARS-CoV-2 can induce these host antiviral pathways despite minimal  
43 IFN production. Moreover, increased replication and cytopathic effect in *RNASEL* knockout  
44 A549<sup>ACE2</sup> cells implicates OAS-RNase L in restricting SARS-CoV-2. Finally, while SARS-CoV-2  
45 fails to antagonize these host defense pathways, which contrasts with other coronaviruses, the  
46 IFN signaling response is generally weak. These host-virus interactions may contribute to the  
47 unique pathogenesis of SARS-CoV-2.

48

49



50 **Significance**

51  
52 SARS-CoV-2 emergence in late 2019 led to the COVID-19 pandemic that has had devastating  
53 effects on human health and the economy. Early innate immune responses are essential for  
54 protection against virus invasion. While inadequate innate immune responses are associated with  
55 severe COVID-19 diseases, understanding of the interaction of SARS-CoV-2 with host antiviral  
56 pathways is minimal. We have characterized the innate immune response to SARS-CoV-2  
57 infections in relevant respiratory tract derived cells and cardiomyocytes and found that SARS-  
58 CoV-2 activates two antiviral pathways, oligoadenylate synthetase–ribonuclease L (OAS-RNase  
59 L), and protein kinase R (PKR), while inducing minimal levels of interferon. This in contrast to  
60 MERS-CoV which inhibits all three pathways. Activation of these pathways may contribute to the  
61 distinctive pathogenesis of SARS-CoV-2.

62

63

64

65

66

67

68

69

70

71

72

73

74

## 75 **Introduction**

76 Severe acute respiratory syndrome coronavirus (SARS-CoV)-2 emerged in China in late 2019,  
77 causing the COVID-19 pandemic with extensive morbidity and mortality, leading to major changes  
78 in day-to-day life in many parts of the world. This was the third lethal respiratory human  
79 coronavirus, after SARS-CoV in 2002 and Middle East respiratory syndrome coronavirus (MERS-  
80 CoV) in 2012, to emerge from bats in the twenty-first century. Although these viruses are all  
81 members of the *Betacoronavirus* genus (1), each has caused a somewhat different pattern of  
82 pathogenesis and spread in humans, with SARS-CoV-2 alone capable of spreading from  
83 asymptomatic or presymptomatic individuals (2). Therefore it is important to understand how  
84 these viruses interact with their host.

85

86 Coronaviruses are enveloped viruses with large, positive-sense single-stranded (ss)RNA  
87 genomes of around 30kb that can infect a diverse range of mammals and other species.  
88 Coronaviruses use much of their genomes, including their approximately 20 kb Orf1ab replicase  
89 locus comprising the 5' two thirds of the genome, to encode proteins that antagonize host cell  
90 responses (3). As a result they are remarkably adept at antagonizing host responses, in particular  
91 the double-stranded RNA (dsRNA)-induced pathways that are essential components of the host  
92 innate immune response (4-8). In addition, interspersed among the structural genes encoded in  
93 the 3' third of the genome are lineage-specific genes encoding accessory proteins, which are non-  
94 essential for RNA replication and variable among CoV lineages that further divide the  
95 *Betacoronavirus* genus (9). These accessory proteins often have functions in antagonizing host  
96 cell responses and thus likely contribute to discrepancies in pathogenesis and tropism observed  
97 among the different lineages (10-12).

98

99 Like other RNA viruses, coronaviruses produce dsRNA early during the infection cycle as a result  
100 of genome replication and mRNA transcription (13). Host cell pattern recognition receptors

101 (PRRs) sense viral dsRNA as pathogenic non-self and respond by activating several antiviral  
102 pathways critical for early defense against viral invasion. DsRNA sensing by cytosolic PRRs can  
103 be divided into three key pathways – interferon (IFN) production, oligoadenylate-ribonuclease L  
104 (OAS-RNase L) activation, and protein kinase R (PKR) activation (**Fig 1**) (14). Detection of dsRNA  
105 by MDA5 during coronavirus infection (15), leads to the production of type I ( $\alpha/\beta$ ) and type III ( $\lambda$ )  
106 IFN. Upon binding to its specific cell surface receptor, IFN triggers phosphorylation of STAT1 and  
107 STAT2 transcription factors, which then induce expression of IFN stimulated genes (ISGs) with  
108 antiviral activities (16, 17). In parallel, dsRNA is also sensed by oligoadenylate synthetases  
109 (OASs), primarily OAS3, which synthesize 2',5'-linked oligoadenylates (2-5A) (18, 19).  
110 Generation of 2-5A induces dimerization and activation of RNase L, leading to degradation of viral  
111 and host ssRNA (20). Finally, dsRNA sensing by PKR induces PKR autophosphorylation,  
112 permitting PKR to then phosphorylate the translation initiation factor eIF2 $\alpha$ , which results in  
113 protein synthesis shutdown and restriction of viral replication (21). While RNase L and PKR  
114 antiviral activity are not dependent on IFN production (18), the genes encoding OASs and PKR  
115 are ISGs, therefore these pathways can be activated and/or reinforced by IFN production.  
116 Similarly, RNase L and PKR activation can promote IFN production, cellular stress, inflammation,  
117 and/or apoptotic death (22-27), thus further reducing host cell viability.

118  
119 Induction and inhibition of innate immune responses during infection with SARS-CoV-2 have yet  
120 to be fully characterized. Several recent reports implicate genetic deficiencies in IFN responses  
121 (28, 29) or polymorphisms in OAS genes (30) with more severe COVID-19 disease, emphasizing  
122 the importance of understanding the interactions between SARS-CoV-2 and these innate  
123 response pathways. Furthermore, while it is known that SARS-CoV-2 enters the human body  
124 through the upper respiratory tract, it is unclear which cell types of the upper and lower respiratory  
125 system contribute to sustained infection and resulting disease in the airways and elsewhere. We

126 have performed SARS-CoV-2 infections of primary nasal epithelial cells, induced pluripotent stem  
127 cell (iPSC)-derived alveolar type 2 cells (iAT2), and iPSC-derived cardiomyocytes (iCM), which  
128 collectively represent the host tissues likely affected by clinical SARS-CoV-2 infection (31, 32).  
129 We assessed viral replication in these cell types as well as the degree of ensuing dsRNA-sensing  
130 responses. We also employed two lung derived immune-competent cells lines, Calu-3 and A549  
131 cells, to investigate dsRNA-induced pathway activation during SARS-CoV-2 infection. In addition,  
132 we compared host responses to SARS-CoV-2 with those of MERS-CoV and MERS-CoV-  
133  $\Delta$ NS4ab, a mutant lacking expression of two dsRNA-induced innate immune pathway antagonists  
134 that we have characterized previously (10).

## 135 136 **Results**

### 137 138 **SARS-CoV-2 replicates efficiently in cells derived from upper and lower respiratory tract.**

139 We compared the replication of SARS-CoV-2 and MERS-CoV in nasal epithelia-derived cells, a  
140 relevant site of infection *in vivo* (**Fig 2A**). For each virus, replication was similar in cells from four  
141 different individuals, although the extent of replication was somewhat variable. The trends in  
142 replication kinetics, however, were significantly different between SARS-CoV-2 and MERS-CoV  
143 infections. Replication of SARS-CoV-2 increased until 96hpi, but then plateaued at nearly  $10^6$   
144 plaque-forming units (PFU)/ml. MERS-CoV replication peaked at 96hpi, at a lower titer than  
145 SARS-CoV-2, and produced fewer PFU/mL at later timepoints. Nasal epithelial cell cultures were  
146 stained with antibodies to identify ciliated cells (anti-type IV  $\beta$ -tubulin), a key feature of this cell  
147 type, and either SARS-CoV-2 or MERS-CoV nucleocapsid expression (anti-N protein) (**Fig 2B**).  
148 We detected abundant N expression in both SARS-CoV-2 and MERS-CoV infected cells,  
149 indicating that these cells were sufficiently infected at 48 hours post infection (hpi). Interestingly,  
150 robust replication occurred in these cultures, despite a very low level of ACE2 protein expression  
151 in cells from the three individuals examined (**Fig 2C**).

152

153 We measured dsRNA-induced host responses to SARS-CoV-2 infection, including type I and type  
154 III IFN mRNA induction, RNase L activation, and PKR activation, in the nasal cells. For RT-qPCR  
155 analysis, we extracted RNA from SARS-CoV-2 infected cultures from four different donors at  
156 120hpi. We verified that virus was replicating by quantifying viral genome copies from intracellular  
157 RNA (**Fig S1A**). We then quantified mRNA expression of IFN- $\beta$  (type I IFN), IFN- $\lambda$  (type III IFN),  
158 select ISGs (*OAS2*, *IFIT1*, *IFIH1*), and the neutrophil attracting chemokine IL-8 (*CXCL8*), which  
159 has been implicated in nasal inflammation during viral infection (33, 34) (**Fig 2D**). There was some  
160 induction of IFN- $\beta$  and to a lesser extent IFN- $\lambda$  mRNA, and minimal induction of the ISG mRNAs  
161 examined. Similarly, *CXCL8* encoding IL-8 was barely induced. Interestingly, this may be at least  
162 partially due to high basal levels of IFN (notably IFN- $\lambda$ ) and ISG (notably *OAS2*) mRNAs  
163 compared with other cell types examined below, which would result in weak fold changes in  
164 mRNA levels compared with mock infected cells (**Fig S2**). To further investigate this very weak  
165 ISG induction, using cells from the same donors as the IFN/ISG mRNA quantification, we  
166 assessed the phosphorylation of STAT1, a transcription factor that is itself encoded by an ISG,  
167 which is primarily a key mediator of type I and type III IFN signaling (35). Consistent with the weak  
168 activation of ISGs, there was no evidence of phosphorylation of STAT1 (**Fig 2C**). In addition, we  
169 did not detect PKR activation in SARS-CoV-2 infected cells, as indicated by the absence of  
170 phosphorylated PKR and eIF2 $\alpha$ . This is in contrast to the phosphorylated eIF2 $\alpha$  detected in  
171 Sendai virus (SeV) infected cells from two of the three donors (**Fig 2C**). We also assessed  
172 activation of the OAS-RNase L pathway during SARS-CoV-2 infection of cells from two of the  
173 same four donors. Since 28S and 18S ribosomal RNAs (rRNAs) are targeted for degradation by  
174 activated RNase L, we evaluated 28S and 18S rRNA integrity using a Bioanalyzer as a readout  
175 for RNase L activation. The absence of any rRNA degradation in SARS-CoV-2 infected cells (**Fig**  
176 **2E**) indicated that RNase L was not activated despite abundant RNase L protein expression (**Fig**  
177 **2C**).

178  
179  
180 Next, we sought to examine host innate immune responses during infection of alveolar type 2  
181 cells (AT2), a major target of SARS-CoV-2 infection in humans (31, 36, 37). We employed induced  
182 pluripotent stem cell (iPSC)-derived iAT2 cells (SPC2 line), expressing tdTomato from the  
183 endogenous locus of surfactant protein-C (SFTPC), an AT2 cell specific marker (38). As in nasal  
184 cells, virus replicated efficiently, reaching a titer of  $10^6$  PFU/ml by 48hpi (**Fig 3A**). Staining of  
185 cultures with an anti-N antibody showed that most of the iAT2 cells were infected, without obvious  
186 cytopathic effect (CPE) during infection (**Fig 3B**). Notably, SARS-CoV-2 infection of iAT2 cells  
187 was robust despite ACE2 expression being below the level of detection by immunoblotting (**Fig**  
188 **3C**). We observed activation of the PKR pathway as indicated by both PKR and eIF2 $\alpha$   
189 phosphorylation (**Fig 3C**). We extracted RNA from infected iAT2 cells for RT-qPCR analysis,  
190 verified these cells were replicating virus by quantifying genome RNA copies (**Fig S1B**), and  
191 assessed IFN/ISG induction. As with the nasal cells, we observed weak induction of IFN- $\beta$  and  
192 IFN- $\lambda$  mRNA from mock infected and infected cells (**Fig 3D**), as well as no detection of MDA5  
193 protein (15), a dsRNA sensor in the pathway leading to IFN production during coronavirus  
194 infection (**Fig 3C**). We used the alphavirus Sindbis virus (SINV) as a positive control, which we  
195 have previously shown induces robust activation of all dsRNA-induced pathways (10).  
196 Surprisingly, we observed greater increases in OAS2 and IFIT mRNA expression by SARS-CoV-  
197 2 compared with SINV (**Fig 3D**), but with minimal induction of IFIH1 mRNA, consistent with the  
198 lack of MDA5 protein expression (**Fig 3C&D**). However, we did not observe phosphorylation of  
199 STAT1 (**Fig 3C**), as in the nasal cells above. Additionally, we did not observe any degradation of  
200 rRNA in SARS-CoV-2 infected cells, and only slight degradation by SINV despite ample  
201 expression of RNase L (**Fig 3E**), suggesting minimal activation of RNase L in iAT2 cells in general.

202  
203 **SARS-CoV-2 replicates and induces innate immune responses in iPSC-derived**  
204 **cardiomyocytes.** Since many COVID-19 patients experience cardiovascular symptoms and

205 pathology (39, 40), we investigated SARS-CoV-2 infection of iPSC derived-cardiomyocytes (iCM).  
206 SARS-CoV-2 replicated robustly in these cells, reaching titers of approximately  $10^6$  PFU/ml by  
207 48hpi (**Fig 4A**), similar to replication in nasal and iAT2 cells. Cells were stained with an antibody  
208 against cardiac troponin-T (cTnT) as a marker for cardiomyocytes, and an antibody against the  
209 viral N protein to identify infected cells (**Fig 4B**). In addition, we detected clear CPE in the iCM,  
210 which differed from infected nasal and iAT2 cells. This CPE included syncytia resulting from cell-  
211 to-cell fusion, which is typical of coronaviruses (41-45). Interestingly, while we observed  
212 detectable ACE2 protein expression in mock infected or SINV infected cells in two independent  
213 experiments, we observed loss of ACE2 expression upon SARS-CoV-2 infection, consistent with  
214 a recent study (32) (**Fig 4C**). We extracted RNA from mock infected cells and cells infected with  
215 SARS-CoV-2 or SINV, verified that virus was replicating by quantifying viral genome (**Fig S1C**),  
216 and quantified expression of mRNAs for IFNs and select ISGs. We found low levels of IFN/ISGs  
217 transcript in iCM similar to the nasal and iAT2 cells (**Fig D**), perhaps due to the undetectable  
218 levels of MDA5 and MAVS protein expression in these cells (**Fig 4C**). SINV also induced host  
219 mRNAs weakly, with the exception of IFN- $\lambda$ , in these cells (**Fig 4D**). We observed no degradation  
220 of rRNA, suggesting an absence of RNase L activation in iCM with SARS-CoV-2 or SINV (**Fig**  
221 **4E**), despite clear infection with either virus (**Fig S1C**). This was not surprising as there was no  
222 RNase L detectable by immunoblot in these cells (**Fig 4C**). Finally, as in iAT2 cells, we observed  
223 phosphorylation of PKR and eIF2 $\alpha$ , indicating that the PKR antiviral pathway is activated (**Fig**  
224 **4C**).

225  
226

### 227 **SARS-CoV-2 replicates in respiratory epithelial cell lines and induces dsRNA responsive** 228 **pathways.**

229

230 To further characterize the relationship between SARS-CoV-2 and dsRNA-induced host response  
231 pathways, we chose two respiratory epithelium-derived human cell lines, A549 and Calu-3, both  
232 of which are immune competent and have been used for studies of SARS-CoV (46) and MERS-

233 CoV (10, 47). A549 cells were not permissive to SARS-CoV-2, due to lack of expression of the  
234 SARS-CoV-2 receptor ACE2 (**Fig S3**). Therefore, we generated A549 cells expressing the ACE2  
235 receptor (A549<sup>ACE2</sup>) by lentiviral transduction, and used two single cell clones, C44 and C34, for  
236 all experiments (**Fig S3**). Both A549<sup>ACE2</sup> clones express high levels of ACE2 greater than the  
237 endogenously expressed ACE2 in Calu-3 cells (**Fig S3**) and in the primary cells discussed above  
238 (**Fig 2-4**).

239

240 We performed single step growth curves to measure replication of SARS-CoV-2 over the course  
241 of one infectious cycle in A549<sup>ACE2</sup> cells, simian Vero-E6 cells, which are commonly used to  
242 prepare SARS-CoV-2 stocks, and Calu-3 cells (clone HTB-55). SARS-CoV-2 replicated robustly  
243 in A549<sup>ACE2</sup> and Vero-E6 cells (**Fig 5A**), although viral yields were lower in Calu-3 cells (**Fig 5B**).  
244 Since Calu-3 cells also support MERS-CoV infection, we compared SARS-CoV-2 replication to  
245 that of wild type MERS-CoV and MERS-CoV- $\Delta$ NS4ab, a mutant deleted in host cell antagonists  
246 NS4a, a dsRNA-binding protein, and NS4b, a 2'5'-phosphodiesterase that prevents RNase L  
247 activation and nuclear translocation of NF- $\kappa$ B (10, 48). Consistent with our previous work (10),  
248 MERS-CoV- $\Delta$ NS4ab reduced viral titers from WT MERS-CoV levels, although they remained  
249 higher than SARS-CoV-2 titers (**Fig 5B**). To further understand the replication of SARS-CoV-2,  
250 we stained A549, Vero-E6, and Calu-3 cells at 24 hpi with antibodies against viral N protein and  
251 viral dsRNA, including additional Calu-3 staining at 48 hpi since replication kinetics are slower  
252 (**Fig 5C**). We observed cytopathic effect in all three cell types, with N localized to the cytoplasm.  
253 Syncytia were observed in A549<sup>ACE2</sup> and Calu-3 cells, but not in Vero-E6 cells (**Fig 5C**). We also  
254 observed viral dsRNA localized to perinuclear foci as we and others have described during  
255 infection with other coronaviruses (10, 49-51).

256

257 We used RT-qPCR to quantify the induction of type I and type III IFNs and select ISGs at 24 and



258 48 hpi (**Fig 6A**), as well as the intracellular viral genome copies to verify replication (**Fig 6B**) in  
259 A549<sup>ACE2</sup> cells. Using SINV as a positive control, we found relatively low levels of both IFN $\beta$  and  
260 IFN $\lambda$  mRNA at 24 and 48 hpi by SARS-CoV-2, compared to SINV (**Fig 6A**). Notably, IFN induction  
261 was greater than observed in the nasal, iAT2, or iCM cells, possibly due to lower basal levels of  
262 IFN $\beta$ , but not IFN $\lambda$ , mRNA in the A549<sup>ACE2</sup> cells, which allow for greater fold changes over mock  
263 infected cells (**Fig S2**). Levels of ISG mRNAs were variable, with SARS-CoV-2 inducing moderate  
264 levels of OAS2 and IFIT1 mRNAs, but only late in infection (48 hpi), similar to those induced by  
265 SINV at 24 hpi (**Fig 6A**). We observed minimal effects on mRNA levels of IFIH1 and CXCL8 at  
266 both timepoints (**Fig 6A**). Furthermore, we did not detect any STAT1 phosphorylation at 24 hpi  
267 (**Fig 6C**), which correlates with weak ISG expression, suggesting defective IFN signaling  
268 downstream of IFN production.

269

270 We evaluated IFN/ISG responses in Calu-3 cells, which provided a second lung-derived cell line  
271 that additionally supports both SARS-CoV-2 and MERS-CoV infection, allowing us to compare  
272 host responses between the two lethal CoVs. We compared SARS-CoV-2 responses to both WT  
273 MERS-CoV and mutant MERS-CoV- $\Delta$ NS4ab (**Fig 7A**). Although we observed reduced MERS-  
274 CoV- $\Delta$ NS4ab infectious virus production compared with WT MERS-CoV (**Fig 5B**), we detected  
275 similar intracellular viral genome levels of all three viruses (**Fig 7B**). We found previously that  
276 MERS-CoV- $\Delta$ NS4ab induces higher levels of IFNs and ISGs compared to WT MERS-CoV, and  
277 also activates RNase L and PKR (10). Herein, in Calu-3 cells, we observed greater SARS-CoV-  
278 2 induction of IFN mRNAs as compared to A549<sup>ACE2</sup> cells (**Fig 6A&S4B**). Interestingly, SARS-  
279 CoV-2 induced higher IFN mRNA levels than WT MERS-CoV at 24 and 48 hpi (**Fig 7A**). Similarly,  
280 SARS-CoV-2 generally induced more ISG mRNA than WT MERS-CoV, and even more OAS2  
281 mRNA than MERS- $\Delta$ NS4ab (**Fig 7A**). Induction of CXCL8 was weak for all viruses (**Fig 7A**).  
282 Notably, SARS-CoV-2 induced ISG mRNAs in Calu-3 (24hpi) without the delay observed in

283 A549<sup>ACE2</sup> cells. Consistent with earlier ISG mRNA induction during infection, SARS-CoV-2  
284 infection promoted phosphorylation of STAT1 in Calu-3 cells (**Fig 7C**), as recently reported (52).  
285 SARS-CoV-2 induced phosphorylation of STAT1 as well as rapid IFIT1 and OAS2 mRNA  
286 induction suggests a similar host response to SARS-CoV-2 as that observed during mutant  
287 MERS-CoV- $\Delta$ NS4ab infection, and not that of WT MERS-CoV infection.

288  
289 **SARS-CoV-2 infection activates RNase L and PKR.** We assessed activation of the RNase L  
290 pathway by analyzing intracellular rRNA integrity in infected cells, as described above. We found  
291 that in A549<sup>ACE2</sup>, SARS-CoV-2 promoted rRNA degradation by 24 hpi, which was more clearly  
292 observed at 48 hpi, using SINV as a positive control (**Fig 8A**). Evaluation of RNase L activation  
293 in SARS-CoV-2, WT MERS-CoV, and MERS-CoV- $\Delta$ NS4ab infected Calu-3 cells showed SARS-  
294 CoV-2 activation of RNase L to a similar extent as MERS-CoV- $\Delta$ NS4ab (10, 53) (**Fig 8B**). In  
295 contrast, as we previously reported, MERS-CoV failed to activate RNase L (10, 47) (**Fig 8B**). We  
296 also observed activation of PKR as indicated by phosphorylation of PKR and downstream eIF2 $\alpha$ ,  
297 in both A549<sup>ACE2</sup> cells (**Fig 8C**) and Calu-3 cells (**Fig 8D**) infected with SARS-CoV-2. In Calu-3  
298 cells, SARS-CoV-2 induced PKR phosphorylation to a similar extent as MERS-CoV- $\Delta$ NS4ab,  
299 while WT MERS-CoV failed to induce a response. These data are consistent with IFN/ISG  
300 induction data described above, suggesting that SARS-CoV-2 may not antagonize dsRNA  
301 pathways as efficiently as MERS-CoV, but instead induces host responses similar to those  
302 observed during MERS-CoV- $\Delta$ NS4ab infection.

303  
304 The A549<sup>ACE2</sup> cells were valuable in that they provided a system with intact innate immune  
305 responses that was also amenable to CRISPR-Cas9 engineering. Thus, we used the A549<sup>ACE2</sup>  
306 cells to construct additional cell lines with targeted deletions of *MAVS*, *RNASEL*, or *PKR*, as we  
307 have done previously for parental A549 cells (19, 54). We could then use these cells to determine  
308 whether activation of IFN, RNase L, and/or PKR resulted in attenuation of SARS-CoV-2

309 replication (19, 54). We validated the knockout (KO) A549<sup>ACE2</sup> cell lines by western blot (**Fig S5A**)  
310 and compared replication of SARS-CoV-2 in *MAVS* KO, *RNASEL* KO and *PKR* KO cells with  
311 levels in WT A549<sup>ACE2</sup> cells (**Fig 9A**). Interestingly, there was little effect on SARS-CoV-2  
312 replication with *MAVS* or *PKR* expression absent. At 48 hpi in *RNASEL* KO cells, virus replication  
313 was two- to four-fold higher compared to WT A549<sup>ACE2</sup> cells (**Fig 9A**). While the difference in  
314 replication between *RNASEL* KO and WT was not extensive, it was statistically significant in three  
315 independent experiments. As a result of higher viral titers, infected *RNASEL* KO cells exhibited  
316 strikingly more CPE as compared with WT, *PKR* KO, or *MAVS* KO cells, as demonstrated by  
317 crystal violet-staining of infected cells (**Fig 9B**).

318

319 We assessed rRNA degradation in cells infected with SARS-CoV-2 or SINV (**Fig 9C**) and, as  
320 expected, found that rRNA remained intact in the *RNASEL* KO A549<sup>ACE2</sup> cells, which further  
321 validated these cells. However, rRNA was degraded in *PKR* or *MAVS* KO cells, indicating RNase  
322 L activation in both of these cell types (**Fig 9C**). Similarly, the *PKR* pathway was activated by  
323 SARS-CoV-2 (**Fig 9D**) and SINV (**Fig S5B**), as evidenced by phosphorylation of *PKR* and *eIF2 $\alpha$* ,  
324 in both *RNASEL* KO and *MAVS* KO cells. More p*PKR* was detected in *RNASEL* KO cells than  
325 WT or *MAVS* KO cells, perhaps due to higher viral titer. Moreover, phosphorylated p*eIF2 $\alpha$*  was  
326 observed even in absence of *PKR*, suggesting that at least one other kinase may contribute to  
327 phosphorylation of *eIF2 $\alpha$*  during infection with SARS-CoV-2 (**Fig 9D**) but not SINV (**Fig S5B**).  
328 These data are consistent with our previous findings that activation of the RNase L pathway does  
329 not depend on *MAVS* signaling in A549 cells infected with SINV or Zika virus (ZIKV) (18, 55), and  
330 demonstrate that the *PKR* pathway can also be activated independently of *MAVS*. Thus, RNase  
331 L and *PKR* activation occur in parallel with IFN production (**Fig 1**), are not dependent on each  
332 other (56).

333

334

335  
336 **Discussion**

337  
338 We evaluated responses to SARS-CoV-2 infection in primary nasal epithelia-derived upper airway  
339 cells and iPSC-derived type II airway (iAT2) cells, as well as iPSC-derived cardiomyocytes (iCM),  
340 another likely target of infection (32). To complement these studies, we used two lung derived  
341 transformed cell lines, Calu-3 cells and two different A549<sup>ACE2</sup> clones, to more mechanistically  
342 dissect activation and antagonism of these pathways by SARS-CoV-2. We found that the extent  
343 of IFN induction and signaling is variable among the primary cell types and cell lines used, but is  
344 consistently only poorly induced. Interestingly, we show that SARS-CoV-2 infection results in  
345 more IFN signaling (phosphorylation of STAT1 and IFN/ISG expression) when compared to  
346 MERS-CoV in Calu-3 cells. We also found that SARS-CoV-2 activates RNase L and PKR in both  
347 cell lines used, and PKR in iAT2 cells and iCM, but not in primary nasal cells. Using KO cell lines,  
348 we demonstrate that RNase L expression significantly impacts SARS-CoV-2 viral titers and CPE  
349 observed during infection. These data suggest that while SARS-CoV-2 is generally a weak  
350 activator of IFN signaling responses of the respiratory and cardiovascular systems, SARS-CoV-  
351 2 can induce the PKR and OAS-RNase L pathways and thus is less adept at antagonizing host  
352 responses than MERS-CoV.

353  
354 As nasal cells are the initial replication site of SARS-CoV-2 and MERS-CoV, we quantified virus  
355 replication in infected nasal cell culture. We found that SARS-CoV-2 replicates to higher titer than  
356 MERS-CoV, and that the time period for shedding of virus is much longer (**Fig 2A**). We suggest  
357 that this longer period of replication in nasal cells and stronger immune responses in Calu-3 cells  
358 may in part explain why SARS-CoV-2 is less virulent, yet more contagious than MERS-CoV.  
359 Indeed for SARS-CoV-2,  $R_0=5.7$  (57) while for MERS-CoV,  $R_0=0.45$  (58).

360

361 Infection of all three primary cell types – nasal cells, iAT2 cells, and iCM – resulted in high levels  
362 of SARS-CoV-2 replication, while only iCM exhibited obvious CPE (**Figs 2-4**). Syncytia formation  
363 was observed in both A549<sup>ACE2</sup> and Calu-3 cell lines and IFA staining with viral dsRNA-specific  
364 antibody (J2) showed SARS-CoV-2 dsRNA localized to perinuclear areas in A549<sup>ACE2</sup> and Calu-  
365 3 cells, which is typical of coronavirus infection (**Fig 5**). The protein expression level of the SARS-  
366 CoV-2 host receptor ACE2 (59-61) in primary cells and Calu-3 cells was either low or  
367 undetectable, indicating that high levels of receptor are not necessary for productive infection (**Fig**  
368 **2-4&S3**). This is similar to previous observations in the murine coronavirus (MHV) system where  
369 viral receptor CEACAM1a is very weakly expressed in the mouse brain, a major site of infection,  
370 and particularly in neurons, the most frequently infected cells (62).

371  
372 The canonical IFN production and signaling pathways activated by the sensing of dsRNA, an  
373 obligate intermediate in viral genome replication and mRNA transcription, provide a crucial early  
374 antiviral response (**Fig 1**). However, the role of IFN responses during coronavirus infection is  
375 complex and at times contradictory. While IFNs may contribute to pathogenesis later on in  
376 infection, coronaviruses, often prevent these responses early on during infection in both animal  
377 models and humans (63-66). Indeed, weak IFN responses have been observed during initial  
378 stages of SARS-CoV-2 infection, but IFN produced later may contribute to the strong inflammatory  
379 responses and resulting immunopathology observed during SARS-CoV-2 infection cytokine  
380 storms (67, 68). Providing further evidence for the role of IFN in influencing coronavirus  
381 pathogenesis, genetic defects in IFN signaling or the presence of antibodies against type I IFNs  
382 are found in a fraction of individuals with severe COVID-19 (28, 29). Genome wide associations  
383 of the *OAS1*, *OAS2*, *OAS3* genes as well as the *IFNAR2* receptor subunit gene have also been  
384 associated with COVID-19 severity (30).

385

386 Antagonism of dsRNA-induced antiviral pathways has been well characterized for lineage a (for  
387 example, MHV) (11) and lineage c betacoronaviruses (MERS-CoV and related bat viruses) (10),  
388 however there is less known about lineage b betacoronaviruses, including SARS-CoV (2002) and  
389 SARS-CoV-2. We and others have previously found that both MHV and MERS-CoV  
390 betacoronaviruses induce only minimal type I and type III IFNs, and fail to activate RNase L or  
391 PKR pathways (11, 47, 50, 69, 70). We found that SARS-CoV-2, like other betacoronaviruses,  
392 induced limited amounts of type I and type III IFN mRNAs, although this was somewhat variable  
393 among the cell types examined. Using SINV as a control for robust activation of IFN, we detected  
394 low levels of type I and type III IFN mRNA in nasal cell, iAT2 cells, and iCM (**Fig 2-4**). However,  
395 we observed higher levels of OAS2, an ISG, relative to SINV in iAT2 cells (**Fig 3D**). As we have  
396 observed among murine cells, we saw vastly different levels of basal expression of both IFN and  
397 ISG mRNAs among the cell types infected (**Fig S2**) (70-72). It is understood that higher basal  
398 levels of innate immune response mRNAs typically result in a lower threshold for activation of  
399 corresponding responses. Interestingly, we observed significantly higher basal levels, especially  
400 IFN- $\lambda$ , in (uninfected) nasal cells as compared to iAT2 cells and iCM (**Fig S2A**). As major barrier  
401 cells, we speculate that this may be important for protection as these cells are more often exposed  
402 to infectious agents in the environment. Indeed, it is well documented that IFN- $\lambda$  serves as an  
403 added defense for epithelial cells, which may perhaps explain some of the differences observed  
404 in basal gene expression between nasal cells and iCM (73-75). As previously reported in heart  
405 tissue, the iCM expressed undetectable levels of both MAVS and RNase L, (23, 76), which is  
406 possibly to protect the heart from excessive inflammation.

407

408 In A549<sup>ACE2</sup> cells, SARS-CoV-2 induced low levels of IFN- $\lambda$  and IFN- $\beta$  mRNAs and somewhat  
409 higher ISG mRNA by 48 hpi, as compared with SINV (**Fig 6A**). We observed greater increases  
410 in IFN induction in Calu-3 compared to A549<sup>ACE2</sup> (**Fig 7A**), which may be at least partially due to

411 higher basal levels of IFNs in the Calu-3 cells (**Fig S2**). Calu-3 cells were employed to directly  
412 compare the host response to SARS-CoV-2 infection with that of MERS-CoV and mutant MERS-  
413 CoV- $\Delta$ NS4ab, which lacks the NS4a and NS4b proteins that inhibit IFN production and signaling  
414 (10, 48, 50). In Calu-3 cells, SARS-CoV-2 induced more IFN mRNA than WT MERS-CoV,  
415 approaching the level of MERS-CoV- $\Delta$ NS4ab (**Fig 7A**). Furthermore, SARS-CoV-2 induced  
416 higher levels of ISG mRNAs than MERS-CoV and, in the case of OAS2, higher than MERS-CoV-  
417  $\Delta$ NS4ab as well. Consistent with this, in Calu-3 cells SARS-CoV-2 and MERS-CoV- $\Delta$ NS4ab, but  
418 not WT MERS-CoV, promoted STAT1 phosphorylation (**Fig 7C**), which leads to ISG transcription  
419 and antiviral responses. Overall, our results displayed a trend of relatively weak IFN responses  
420 induced by SARS-CoV-2 in airway epithelial cells with limited ISG induction, when compared  
421 with host responses to viruses from other families. This is in agreement with a recent report  
422 demonstrating that the SARS-CoV-2 Orf6 encoded protein blocks STAT1 entry into the nucleus,  
423 leading to the relatively weak IFN induction (77). Additionally, our data show that enhanced  
424 IFN/ISG responses in Calu-3 cells restrict virus production, while lower host responses in  
425 A549<sup>ACE2</sup> cells correlate with higher viral titers (**Fig 5**). Considering how robust ACE2 expression  
426 appears dispensable for infection of some cell types (nasal, iAT2, Calu-3), these data also  
427 indicate that stronger innate immune responses may be more effective at restricting SARS-CoV-  
428 2 replication than low ACE2 expression level.

429  
430 We found that SARS-CoV-2 was unable to prevent activation of RNase L and PKR, although to  
431 different extents among the cell types, unlike MHV and MERS-CoV, which shut down these  
432 pathways (10, 11, 69). We observed PKR activation as indicated by phosphorylation of PKR and  
433 eIF2 $\alpha$  in SARS-CoV-2 infected iAT2 (**Fig 3C**) and iCM (one/two experiments) (**Fig 4C**), but not in  
434 nasal cells (**Fig 2C**). However, we did not detect rRNA degradation indicative of RNase L  
435 activation in these cell types (**Fig 2E, 3E, 4E**). Activation of both RNase L and PKR were observed



436 in A549<sup>ACE2</sup> and Calu-3 cells during infection with SARS-CoV-2 (**Fig 8**). In Calu-3 cells, this  
437 contrasted MERS-CoV and was more similar to MERS-CoV- $\Delta$ NS4ab. Previous studies have  
438 shown that MERS-CoV NS4a restricts phosphorylation of PKR by binding dsRNA, reducing its  
439 accessibility to PKR (10, 50). Additionally, MERS-CoV NS4b, a 2'-5' phosphodiesterase, prevents  
440 RNase L activation by degrading 2-5A, the small molecular activator of RNase L (10, 47). Current  
441 understanding of SARS-CoV-2 protein function infers an absence of these types of protein  
442 antagonists, therefore it is not surprising that both of these pathways are activated during infection  
443 of both A549<sup>ACE2</sup> and Calu-3. Indeed, MERS-CoV- $\Delta$ NS4ab attenuation compared to WT MERS-  
444 CoV, as well as lower SARS-CoV-2 titers than those of MERS-CoV (**Fig 5B**), may be at least in  
445 part due to RNase L and PKR activation in addition to IFN/ISG induction in Calu-3 cells.

446  
447 We found that SARS-CoV-2 did not activate dsRNA-induced pathway responses as robustly as  
448 SINV (18, 19), which may be due to CoV antagonists encoded by the nsp genes of the replicase  
449 locus (3, 78-80). Most notably, nsp15 encodes an endoribonuclease (EndoU) that has been  
450 shown in the MHV system to restrict dsRNA accumulation and thus limit activation of both RNase  
451 L and PKR (80, 81). Nevertheless, increased, albeit modest, replication and enhanced cell death  
452 in SARS-CoV-2 infected *RNASEL* KO cells indicates that this pathway is activated and indeed  
453 restricts replication and downstream cell death caused by SARS-CoV-2 infection (**Fig 9A&B**). In  
454 contrast, we found that *PKR* KO had no effect on viral titer and infected cells still produced  
455 detectable levels of p $\text{eIF2}\alpha$ . These results mirror a previous report on SARS-CoV, which found  
456 that both PKR and PKR-like ER Kinase (PERK) were activated during infection and contributed  
457 to eIF2 $\alpha$  phosphorylation (82). Our results therefore raise the possibility that SARS-CoV-2  
458 infection activates multiple kinases of the integrated stress response, all of which target eIF2 $\alpha$ .  
459 We have previously found that MERS-CoV infection inhibits host protein synthesis independent



460 of PKR, so that PKR phosphorylation during MERS-CoV- $\Delta$ NS4ab infection did not lead to further  
461 reduction (10).

462

463 KO of *MAVS* and the consequent loss of IFN production had no significant effect on viral titer or  
464 cell death. This is similar to our previous findings demonstrating that RNase L activation can occur  
465 independent of virus-induced IFN production during SINV (55) or ZIKV (18) infection in A549 cells,  
466 as well as during MHV infection of murine bone marrow-derived macrophages (56). We extend  
467 these findings to demonstrate that PKR activation, like OAS-RNase L, can occur independently  
468 of MAVS signaling, perhaps explaining the phosphorylation of PKR and eIF2 $\alpha$  in iCM, which  
469 express undetectable levels of MAVS protein (**Fig 4**). This underscores the importance of the  
470 RNase L and PKR antiviral pathways, which can be activated early in infection upon concurrent  
471 dsRNA sensing by OAS, PKR, and MDA5 receptors before IFN is produced. Alternatively, these  
472 pathways can be activated in cells infected by virus that produce low levels of IFN only late in  
473 infection, as we observe here with SARS-CoV-2. Further studies are required to determine  
474 whether activation of PKR or RNase L during SARS-CoV-2 infection results in functional  
475 outcomes characteristic of these pathways, including inhibition of protein synthesis, induction of  
476 apoptosis, cleavage of viral RNA, or induction of inflammatory responses (**Fig 1**). Interestingly,  
477 we observed possible RNase L-induced apoptosis in the SARS-CoV-2 infected A549<sup>ACE2</sup> WT,  
478 *MAVS* KO, and *PKR* KO cells, when compared with mock infected counterparts (**Fig 9C**).  
479 However, *RNASEL* KO cells displayed the most cell death among the four cell lines, suggesting  
480 that virus-induced cell lysis in the *RNASEL* KO cells where viral titers are highest (**Fig 9B**) is more  
481 detrimental to cells than RNase L-induced programmed cell death.

482

483 We have shown that SARS-CoV-2 activates dsRNA-induced innate immune responses to levels  
484 similar to those of a MERS-CoV mutant lacking two accessory proteins that antagonize these

485 pathways, which highlights the distinctions among coronaviruses in interacting with these  
486 pathways. However, like MERS-CoV and MHV, SARS-CoV-2 induces limited and late IFN/ISG  
487 responses, indicating that proteins antagonizing innate immune responses are likely encoded.  
488 Our future studies will focus on identifying specific innate immunity antagonists among lineage b  
489 betacoronavirus accessory proteins as well as conserved proteins encoded in the replicase  
490 locus.

491

## 492 **Materials and Methods**

493 **Viruses.** SARS-CoV-2 (USA-WA1/2020 strain) was obtained from BEI and propagated in Vero-  
494 E6 cells. The genome RNA was sequenced was found to be identical to GenBank: MN985325.1.  
495 Recombinant MERS-CoV and MERS-CoV- $\Delta$ NS4ab were described previously (10) and were  
496 propagated in Vero-CCL81 cells. Sindbis virus Girdwood (G100) was obtained from Dr. Mark  
497 Heise, University of North Carolina, Chapel Hill (83). Sendai virus (SeV) strain Cantell (84) was  
498 obtained from Dr. Carolina B. Lopez (University of Pennsylvania, now Washington University, St  
499 Louis). All infections and virus manipulations were conducted in a biosafety level 3 (BSL-3)  
500 laboratory using appropriate and approved personal protective equipment and protocols.

501

502

503 **Cell lines.** African green monkey kidney Vero cells (E6) or (CCL81) (obtained from ATCC) were  
504 cultured in Dulbecco's modified Eagle's medium (DMEM; Gibco catalog no. 11965),  
505 supplemented with 10% fetal bovine serum (FBS), 100 U/ml of penicillin, 100  $\mu$ g/ml streptomycin,  
506 50  $\mu$ g/ml gentamicin, 1mM sodium pyruvate, and 10mM HEPES. Human A549 cells (verified by  
507 ATCC) were cultured in RPMI 1640 (Gibco catalog no. 11875) supplemented with 10% FBS, 100  
508 U/ml of penicillin, and 100  $\mu$ g/ml streptomycin. Human HEK 293T cells were cultured in DMEM  
509 supplemented with 10% FBS and 1 mM sodium pyruvate. Human Calu-3 cells (clone HTB-55)  
510 were cultured in MEM supplemented with 20% FBS without antibiotics.

511

512

513 **Primary cell cultures**

514

515 **Human sinonasal air liquid interface (ALI) cultures.** Sinonasal mucosal specimens were

516 acquired from residual clinical material obtained during sinonasal surgery subsequent to approval

517 from The University of Pennsylvania Institutional Review Board. ALI cultures were established

518 from enzymatically dissociated human sinonasal epithelial cells (HSEC) as previously described

519 (85, 86) and grown to confluence with bronchial epithelial basal medium (BEBM; Lonza,

520 Alpharetta, GA) supplemented with BEGM Singlequots (Lonza), 100 U/ml penicillin and 0.25 µg

521 /ml amphotericin B for 7 days. Cells were then trypsinized and seeded on porous polyester

522 membranes ( $2-3 \times 10^4$  cells per membrane) in cell culture inserts (Transwell-clear, diameter 12

523 mm, 0.4 µm pores; Corning, Acton, MA). Five days later the culture medium was removed from

524 the upper compartment and the epithelium was allowed to differentiate by using the differentiation

525 medium consisting of 1:1 DMEM (Invitrogen, Grand Island, NY) and BEBM (Lonza),

526 supplemented with BEGM Singlequots (Lonza) with 0.1 nM retinoic acid (Sigma-Aldrich), 100

527 UI/ml penicillin, 0.25 µg /ml amphotericin B and 2% Nu serum (Corning) in the basal compartment.

528 Cultures were fed every three days for 6 weeks prior to infection with SARS-CoV-2. The day prior

529 infection, the cells were fed and the apical side of the cultures were washed with 100µl of warm

530 PBS X 3.

531

532 **Alveolar organoids and 2D cultures.** iPSC (SPC2 iPSC line, clone SPC2-ST-B2, Boston

533 University) derived alveolar epithelial type 2 cells (iAT2) were differentiated and maintained as

534 alveolospheres embedded in 3D Matrigel in CK+DCI media, as previously described (38). iAT2

535 were passaged approximately every two weeks by dissociation into single cells via the sequential

536 application of dispase (2mg/ml, Thermo Fisher Scientific, 17105-04) for 1h at 37°C and 0.05%

537 trypsin (Invitrogen, 25300054) for 15min at 37°C and re-plated at a density of 400 cells/µl of

538 Matrigel (Corning, 356231) in CK+DCI media supplemented with ROCK inhibitor for the first 48h,

539 as previously described (38). For generation of 2D alveolar cells for viral infection, alveolospheres  
540 were dispersed into single cells, then plated on pre-coated 1/30 Matrigel plates at a cell density  
541 of 125,000 cells/cm<sup>2</sup> using CK+DCI media with ROCK inhibitor for the first 48h and then the  
542 medium was changed to CK+DCI media at day 3 and infected with SARS-CoV-2 virus.

543  
544 **Cardiomyocytes.** Experiments involving the use of human iPSCs were approved by the  
545 University of Pennsylvania Embryonic Stem Cell Research Oversight Committee. The iPSC line  
546 (PENN123i-SV20) used for cardiomyocyte generation was derived by the UPenn iPSC core as  
547 previously described (87, 88). This line has been deposited at the WiCell repository (Wicell.org).  
548 iPSCs were maintained on Geltrex (Thermofisher Scientific)-coated plates in iPS-Brew XF  
549 (Miltenyi Biotec) media at 37°C in 5% CO<sub>2</sub>/5% O<sub>2</sub>/90% air humidified atmosphere. Cells were  
550 passaged every 5-7 days using Stem-MACS Passaging Solution (Miltenyi Biotec).  
551 Differentiation of SV20 into cardiomyocytes (iCMs) was performed using previously described  
552 protocols (89, 90). In general, iCMs were >95% positive for cardiac Troponin T staining by FACS.  
553 Day 18-25 differentiated cells were replated and used for viral infection experiments.

554  
555 **Generation of A549<sup>ACE2</sup> cells.** A549<sup>ACE2</sup> cells were constructed by lentivirus transduction of  
556 *hACE2*. The plasmid encoding the cDNA of *hACE2* was purchased from Addgene. The cDNA  
557 was amplified using forward primer 5'-ACTCTAGAATGTCAAGCTCTTCCTGGCTCCTTC-3' and  
558 reverse primer 5'-  
559 TTGTGCGACTTACGTAGAATCGAGACCGAGGAGAGGGTTAGGGATAGGCTTACCAAAGGAG  
560 GTCTGAAC'-3 (contained V5 tag sequences). The fragment containing hACE2-V5 was digested  
561 by the XbaI and Sall restriction enzymes from the hACE2 cDNA and was cloned into pLenti-GFP  
562 (Addgene) in place of green fluorescent protein (GFP), generating pLenti-hACE2-V5. The  
563 resulting plasmids were packaged in lentiviruses pseudotyped with vesicular stomatitis virus  
564 glycoprotein G (VSV-G) to establish the gene knock-in cells. Supernatants harvested 48 hours

565 post-transfection were used for transduction into A549 cells. Forty-eight hours after transduction,  
566 cells were subjected to hygromycin (1 mg/ml) selection for 3 days and single-cell cloned. Clones  
567 were screened for ACE2 expression and susceptibility to SARS-CoV-2 replication.

568

569 **CRISPR/Cas9 engineered cells.** *RNASEL*, *PKR* and *MAVS* KO A549<sup>ACE2</sup> cells (clone 44) were  
570 constructed using the same Lenti-CRISPR system and guide RNA sequences as previously  
571 described (19, 54).

572

573 **Viral growth kinetics.** The nasal ALI cultures were apically infected with SARS-CoV-2 (MOI=5)  
574 or MERS-CoV (MOI=5). Viral stocks were diluted in nasal cell media, 50 $\mu$ l was added to each  
575 well, the cells were incubated in 37°C for one hour, then the virus was removed and the cells were  
576 wash three times with 200 $\mu$ l of PBS. For viral growth curves, at indicated time points, 200 $\mu$ l of  
577 PBS was added to the apical surface, collected 5 minutes later and frozen for subsequent analysis  
578 of shed virus by plaque assay. The inserts were transferred to new 24-well plates with fresh media  
579 after each collection. For iAT2 or iCM, cells were plated in 12 or 6-well plates, 4X10<sup>5</sup> cells (iAT2)  
580 or 6.25X10<sup>5</sup> cells per well (iCM), cells were infected with SARS-CoV-2 at MOI=5 (iAT2) or MOI=1  
581 (iCM). At 6, 24, 48 hours postinfection, 200 $\mu$ l of supernatant were harvested and stored in -80°C  
582 for infectious virus titration. For infections, cell lines were plated in 12-well plates, A549 and Vero-  
583 E6 at 5X10<sup>5</sup> cells per well and Calu-3 at 3X10<sup>5</sup> cells per well. Viruses were diluted in serum-free  
584 RPMI (A549 infections) or serum-free DMEM (Vero infections) or serum-free MEM (Calu-3  
585 infections) and added to cells for absorption for 1 hour at 37°C. Cells were washed three times  
586 with PBS and fed with DMEM or RPMI +2% FBS for Vero and RPMI infections, respectively, or  
587 4% FBS in MEM for Calu-3 infections (47). For virus titration 200 $\mu$ l of supernatant was collected  
588 at the times indicated and stored at -80°C for plaque assay on Vero-E6 (SARS-CoV-2) or Vero-  
589 CCL81 (MERS-CoV) cells as previously described (91).

590

591 **Plaque assay.** Briefly virus supernatant was 10-fold serial diluted and inoculum was absorbed on  
592 Vero-E6 cells (SARS-CoV-2) or VeroCCL81 cells (MERS-CoV and MERS-CoV- $\Delta$ 4ab) for 1 hour  
593 at 37°C. Inoculum was overlaid with DMEM plus agarose (either 0.7% or 0.1%) and incubated for  
594 3 days at 37°C. Cells were fixed with 4% paraformaldehyde and stained with 1% crystal violet for  
595 counting plaques.

596

597 **Immunofluorescent staining.** For nasal ALI culture, following 48 hours of infection, the cultures  
598 were fixed in 4% paraformaldehyde at room temperature for 30 minutes. The transwell supports  
599 were washed 3 times with PBS prior to excision of the membrane containing the cells. The cells  
600 were permeabilized with 0.2% Triton X-100 in PBS and then immersed in PBS with 0.2% Triton  
601 X-100, 10% normal donkey serum, and 1% BSA for 60 min at room temperature. Primary antibody  
602 incubation was incubated overnight at 4°C (Type IV tubulin, Abcam ab11315, rabbit anti SARS-  
603 CoV-2 Nucleocapsid protein, GeneTex, Irvine, CA). Visualization was carried out with Alexa  
604 Fluor®-conjugated donkey anti-mouse or anti-rabbit IgGs (Thermo-Fisher) (1:1000; 60 min  
605 incubation at room temperature). Confocal images were acquired with an Olympus Fluoview  
606 System (Z-axis step 0.5 $\mu$ m; sequential scanning). For iAT2, the cell monolayer was fixed using  
607 4% paraformaldehyde (PFA) for 30min, 1X PBS was used to removed PFA and proceed with  
608 antibody staining. Fixed cells were treated with a blocking solution containing 0.1% Triton X-100  
609 and 5% donkey serum in 1X PBS for 30min. Immunostaining was performed for SARS-CoV-2  
610 nucleocapsid protein expression using the SARS-CoV-2 nucleocapsid antibody at 1:1000 dilution  
611 in blocking solution incubated for 30min. After washing primary antibody away, a secondary Alexa  
612 Fluor 488®-conjugated donkey anti-rabbit IgG (H+L) antibody( Thermo-Fisher) was used at 1:400  
613 dilution in blocking solution and incubated for 30min. Secondary antibody was washed away with  
614 1X PBS and DAPI was used for nuclear staining at 2.5 $\mu$ g/ml. iCM were fixed in 4%

615 paraformaldehyde and permeabilized with 0.1% Triton X-100 for 15 min. Cells were blocked with  
616 10% normal donkey serum (Sigma D9663) in 0.2% Tween 20 (Biorad 170-6531) for 1hr.  
617 Antibodies against cardiac troponin T (cTnT, Abcam ab8295; 1:100 mouse) and SARS-CoV-2  
618 nucleocapsid were incubated with cells in blocking solution overnight at 4 °C. Donkey anti-mouse  
619 Alexa Fluor 647®-conjugated (Invitrogen A31571) and Donkey anti-rabbit Alexa Fluor 488®-  
620 conjugated (Invitrogen A21206) were diluted 1:250 in blocking solution and incubated with cells  
621 for 2hr at RT. Slides were mounted in Slowfade Gold anti-fade reagent with DAPI (Invitrogen  
622 S36939). Images were acquired with BZ-X710 all-in-one fluorescence microscope equipped with  
623 BZ-X Viewer software (Keyence Corporation). At the indicated times post-infection cells were  
624 fixed onto glass coverslips (Calu-3 coverslips were coated with rat tail collagen type-1: Cell  
625 Applications, Inc. Cat. # 122-20) with 4% paraformaldehyde for 30 minutes at room temperature.  
626 Cells were then washed three times with PBS and permeabilized for 10 minutes with PBS+0.1%  
627 Triton-X100. Cells were then blocked in PBS and 3% BSA for 30-60 minutes at room temperature.  
628 Primary antibodies were diluted in blocking buffer and incubated on a rocker at room temperature  
629 for one hour. Cells were washed three times with blocking buffer and then incubated rocking at  
630 room temperature for 60 minutes with secondary antibodies diluted in blocking buffer. Finally,  
631 cells were washed twice with blocking buffer and once with PBS, and nuclei stained with DAPI  
632 diluted in PBS (2ng/uL final concentration). SARS-CoV-2 nucleoprotein and dsRNA (J2,1:1000,  
633 Scions) were detected. Secondary antibodies were from Invitrogen: goat anti-mouse IgG Alexa  
634 Fluor 594®-conjugated (A-11005) for J2 and goat anti-rabbit IgG Alexa Fluor 488®-conjugated  
635 (A-11070) for nucleocapsid. Coverslips were mounted onto slides for analysis by widefield  
636 microscopy with Nikon Eclipse Ti2 using a Nikon 40x/0.95NA Plan APO objective and NikonDS-  
637 Qi1Mc-U3 12 bit camera. Images were processed using Fiji/Image J software.

638

639 **Western immunoblotting.** Cells were washed once with ice-cold PBS and lysates harvested at  
640 the indicated times post infection with lysis buffer (1% NP-40, 2mM EDTA, 10% glycerol, 150mM



641 NaCl, 50mM Tris HCl) supplemented with protease inhibitors (Roche – complete mini EDTA-free  
 642 protease inhibitor) and phosphatase inhibitors (Roche – PhosStop easy pack). After 5 minutes  
 643 lysates were harvested, incubated on ice for 20 minutes, centrifuged for 20 minutes at 4°C and  
 644 supernatants mixed 3:1 with 4x Laemmli sample buffer. Samples were heated at 95°C for 5  
 645 minutes, then separated on 4-15% SDS-PAGE, and transferred to polyvinylidene difluoride  
 646 (PVDF) membranes. Blots were blocked with 5% nonfat milk or 5% BSA and probed with  
 647 antibodies (table below) diluted in the same block buffer. Primary antibodies were incubated  
 648 overnight at 4°C or for 1 hour at room temperature. All secondary antibody incubation steps were  
 649 done for 1 hour at room temperature. Blots were visualized using Thermo Scientific SuperSignal  
 650 west chemiluminescent substrates (Cat #: 34095 or 34080). Blots were probed sequentially with  
 651 antibodies and in between antibody treatments stripped using Thermo Scientific Restore western  
 652 blot stripping buffer (Cat #: 21059).

653

654

| Primary Antibody           | Antibody species | Blocking buffer | Dilution | Catalog number                   |
|----------------------------|------------------|-----------------|----------|----------------------------------|
| pPKR (phospho-T446) [E120] | rabbit           | 5% milk/TBST    | 1 : 1000 | Abcam 32036                      |
| PKR (D7F7)                 | rabbit           | 5% milk/TBST    | 1:1000   | Cell Signaling Technology 12297S |
| peif2α (S51)               | rabbit           | 5% BSA/TBST     | 1:1000   | Cell Signaling Technology 9721S  |
| eif2α                      | rabbit           | 5% BSA/TBST     | 1:1000   | Cell Signaling Technology 9722S  |
| GAPDH (14C10)              | rabbit           | 5% milk/TBST    | 1:2000   | Cell Signaling Technology 2118S  |
| SARS-CoV-2 N               | rabbit           | 5% milk/TBST    | 1:2000   | GTX135357 (Gentex)               |
| MERS-CoV N                 | mouse            | 5% milk/TBST    | 1:2000   | 40068-MM10 (Sino Biological)     |
| pSTAT1 (Tyr701)            | rabbit           | 5% BSA/TBST     | 1:1000   | Cell Signaling Technology 7649   |
| STAT1                      | mouse            | 5% BSA/TBST     | 1:1000   | Santa Cruz (C136): SC-464        |
| ACE2                       | rabbit           | 5% milk/TBST    | 1:1000   | Cell Signaling Technology 4355S  |



|                           |            |                 |        |                                                     |
|---------------------------|------------|-----------------|--------|-----------------------------------------------------|
| MAVS                      | rabbit     | 5% milk/TBST    | 1:1000 | Cell Signaling Technology 24930S                    |
| V5                        | rabbit     | 5% milk/TBST    | 1:1000 | Cell Signaling Technology 13202S                    |
| RNase L                   | mouse      | 5% milk/TBST    | 1:1000 | Robert Silverman laboratory (Cleveland Clinic) (20) |
| MDA5                      | rabbit     | 5% milk/TBST    | 1:1000 | Cell Signaling Technology 5321S                     |
| <b>Secondary Antibody</b> |            |                 |        |                                                     |
| goat anti-rabbit IgG      | HRP linked | same as primary | 1:3000 | Cell Signaling Technology 7074S                     |
| goat anti-mouse IgG       | HRP linked | same as primary | 1:3000 | Cell Signaling Technology 7076S                     |

655

656 **Quantitative PCR (RT-qPCR).**

657 A549, Calu-3, and iAT2 cells were lysed at indicated times post infection in RLT buffer and DNase-  
658 treated before total RNA was extracted using the RNeasy Plus Mini Kit (Qiagen). RNA from iCM  
659 and nasal cells was extracted using TRIzol-LS (Ambion), and DNase-treated using the DNA-  
660 free™ Kit (Invitrogen). RNA was reverse transcribed into cDNA with a High Capacity cDNA  
661 Reverse Transcriptase Kit (Applied Biosystems). cDNA was amplified using specific RT-qPCR  
662 primers (see Table below), iQ™ SYBR® Green Supermix (Bio-Rad), and the QuantStudio™ 3  
663 PCR system (Thermo Fisher). Host gene expression displayed as fold change over mock-infected  
664 samples was generated by first normalizing cycle threshold ( $C_T$ ) values to 18S rRNA to generate  
665  $\Delta C_T$  values ( $\Delta C_T = C_T \text{ gene of interest} - C_T \text{ 18S rRNA}$ ). Next,  $\Delta(\Delta C_T)$  values were determined by  
666 subtracting the mock-infected  $\Delta C_T$  values from the virus-infected samples. Technical triplicates  
667 were averaged and means displayed using the equation  $2^{-\Delta(\Delta C_T)}$ . For basal expression levels,  $C_T$   
668 values were normalized to 18S rRNA to generate  $\Delta C_T$  values ( $\Delta C_T = C_T \text{ gene of interest} - C_T \text{ 18S}$   
669 rRNA), and displayed as  $2^{-\Delta C_T}$ . Basal expression levels were also calculated as fold change over  
670 A549<sup>ACE2</sup> clone 44 using the equation  $2^{-\Delta(\Delta C_T)}$ .  $\Delta(\Delta C_T)$  values were calculated by subtracting  $\Delta C_T$   
671 values from each cell type from the  $\Delta C_T$  value of A549<sup>ACE2</sup> clone 44. Absolute quantification of  
672 SARS-CoV-2 and MERS-CoV genomes was calculated using a standard curve generated from

673 serially diluted known concentrations of a digested plasmid containing the region of interest. For  
 674 SARS-CoV-2, construct pcDNA6B-nCoV-NSP12-FLAG encoding the RDRP gene (gift from Dr.  
 675 George Stark, Cleveland Clinic) was digested with Xho1 and purified by Qiagen QIAquick PCR  
 676 Purification Kit to be used as a standard in the RT-qPCR reaction. For MERS-CoV, cDNA MERS-  
 677 D1 (91) containing basepairs 12259–15470 of the MERS-CoV genome was digested with BglI  
 678 and purified by Qiagen QIAquick PCR Purification Kit to be used as a standard in the RT-PCR  
 679 reaction. Copy numbers were generated by standard curve analysis in the QuantStudio™ 3  
 680 software, and copy numbers per ug RNA were calculated based on the volume of cDNA used in  
 681 the qPCR reaction, and concentration of RNA used to generated cDNA. Primer sequences are  
 682 as follows:  
 683

|                                      | Forward primer (5' to 3')     | Reverse primer (5' to 3')     |
|--------------------------------------|-------------------------------|-------------------------------|
| <i>IFNL1</i>                         | CGCCTTGGAAGAGTCACTCA          | GAAGCCTCAGGTCCCAATTC          |
| <i>OAS2</i>                          | TTCTGCCTGCACCACTCTTCACG<br>AC | GCCAGTCTTCAGAGCTGTGCCTTT<br>G |
| <i>IFIT1</i>                         | 5'-TGGTGACCTGGGGCAACTTT       | AGGCCTTGCCCGTTCATAA           |
| <i>IFNB</i>                          | GTCAGAGTGGAATCCTAAG           | ACAGCATCTGCTGGTTGAAG          |
| <i>GAPDH</i>                         | GCAAATTCCATGGCACCGT           | TCGCCCCACTTGATTTTGG           |
| <i>IFIH1</i>                         | GCACAGAGCGGTAGACCCTGCTT       | AGGCCTTGCCCGTTCATAA           |
| <i>CXCL8</i>                         | GAGAGTGATTGAGAGTGGACCAC       | CACAACCCTCTGCACCCAGTTT        |
| 18S rRNA                             | TTCGATGGTAGTCGCTGTGC          | CTGCTGCCTTCCTGAATGTGGTA       |
| SARS-CoV-2<br>genome<br>(nsp12/RdRp) | GGTAACTGGTATGATTTTCG          | CTGGTCAAGGTTAATATAGG          |
| MERS-CoV<br>genome<br>(nsp7)         | GCACATCTGTGGTTCTCCTCTCT       | AAGCCCAGGCCCTACTATTAGC        |

684

685

686 **Analyses of RNase L-mediated rRNA degradation.** RNA was harvested with buffer RLT  
687 (Qiagen RNeasy #74106) or Trizol-LS (Ambion) and analyzed on an RNA chip with an Agilent  
688 Bioanalyzer using the Agilent RNA 6000 Nano Kit and its prescribed protocol as we have  
689 described previously (Cat #: 5067-1511).

690

691 **Statistical analysis.** All statistical analyses and plotting of data were performed using GraphPad  
692 Prism software (GraphPad Software, Inc., CA). SARS-CoV-2 and MERS-CoV replication trends  
693 in nasal cells were analyzed by two-way ANOVA comparing averaged titers from all four donor  
694 cells for each virus at each timepoint. MERS-CoV and MERS-CoV- $\Delta$ NS4ab viral replication and  
695 primary cell RT-qPCR gene expression between SARS-CoV-2 and SINV were analyzed by paired  
696 Student *t* test. RT-qPCR analysis in A549<sup>ACE2</sup> cells was analyzed by one-way ANOVA, comparing  
697 SARS-CoV-2 at each timepoint to SINV. RT-qPCR analysis in Calu-3 cells was analyzed by two-  
698 way ANOVA, comparing SARS-CoV-2 at each timepoint to MERS-CoV and MERS-CoV- $\Delta$ NS4ab.  
699 SARS-CoV-2 replication in A549<sup>ACE2</sup> WT cells compared with A549<sup>ACE2</sup> KO cells was analyzed by  
700 two-way ANOVA. Displayed significance is determined by p-value (P), where \* =  $P < 0.05$ ; \*\* =  $P$   
701  $< 0.01$ ; \*\*\* =  $P < 0.001$ ; \*\*\*\* =  $P < 0.0001$ ; ns = not significant.

702

703

#### 704 **Acknowledgements**

705 We thank Nicholas Parenti for technical help and Dr. Nikki Tanneti for reading the manuscript.  
706 This work was supported by NIH grants AI140442 and supplement for SARS-CoV-2 (SRW),  
707 AI104887 (SRW and RHS); funds from Penn Center for Coronavirus Research and Other  
708 Emerging Pathogens (SRW and YL); NIH grants U01HL148857, R01HL087825, U01HL134745  
709 and R01HL132999 (EM); VA administration grant CX001617 (NAC); NIH grants U01TR001810,

710 N01 75N92020C00005, R01HL095993, and an Evergrande MassCPR award (DNK, JH, and  
711 KDA). RT and WY were supported in part by institutional funds from the University of Pennsylvania  
712 Perelman School of Medicine to the iPSC Core and by NIH grant U01TR001810. DMR was  
713 supported in part by T32-AI055400 and CEC was supported in part by T32 NS-007180,

714

## 715 **Author Contributions**

716 Conceptualization: YL, CEC, DMR, SRW  
717 Methodology: YL, CEC, DMR, JNW, HMR, WY, NAC, JNP, NDA, MAK, EM, RHS, SRW.  
718 Investigation, Performed experiments: YL, CEC, DMR, JNW, HMR, FLC-D, RT, LHT, BD  
719 Writing –Original Draft: SRW, JNW  
720 Writing –Review & Editing: YL, CEC, DMR, JNW, HMR, SRW, EM, NAC, WY, DNK  
721 Funding Acquisition: SRW, WY, EM, NC, RHS, DNK  
722 Resources: WY, NC, EM, RHS, SRW  
723 Supervision: WY, NC, EM, RHS, SRW

## 724 **Declaration of Interests**

725 The authors declare no competing interests.

726

727

## 728 **References**

- 729 1. **Llanes, A., C. M. Restrepo, Z. Caballero, S. Rajeev, M. A. Kennedy, and R. Leonart.**  
730 2020. Betacoronavirus Genomes: How Genomic Information has been Used to Deal with  
731 Past Outbreaks and the COVID-19 Pandemic. *Int J Mol Sci* **21**.
- 732 2. **Fehr, A. R., and S. Perlman.** 2015. Coronaviruses: an overview of their replication and  
733 pathogenesis. *Methods Mol Biol* **1282**:1-23.
- 734 3. **Perlman, S., and J. Netland.** 2009. Coronaviruses post-SARS: update on replication  
735 and pathogenesis. *Nat Rev Microbiol* **7**:439-450.
- 736 4. **Koetzner, C. A., L. Kuo, S. J. Goebel, A. B. Dean, M. M. Parker, and P. S. Masters.**  
737 2010. Accessory protein 5a is a major antagonist of the antiviral action of interferon  
738 against murine coronavirus. *J Virol* **84**:8262-8274.
- 739 5. **Dedeurwaerder, A., D. A. Olyslaegers, L. M. Desmarests, I. D. Roukaerts, S. Theuns,**  
740 **and H. J. Nauwynck.** 2014. ORF7-encoded accessory protein 7a of feline infectious  
741 peritonitis virus as a counteragent against IFN-alpha-induced antiviral response. *J Gen*  
742 *Virol* **95**:393-402.
- 743 6. **Cruz, J. L., I. Sola, M. Becares, B. Alberca, J. Plana, L. Enjuanes, and S. Zuniga.**  
744 2011. Coronavirus gene 7 counteracts host defenses and modulates virus virulence.  
745 *PLoS Pathog* **7**:e1002090.
- 746 7. **Kopecky-Bromberg, S. A., L. Martinez-Sobrido, M. Frieman, R. A. Baric, and P.**  
747 **Palese.** 2007. Severe acute respiratory syndrome coronavirus open reading frame

- 748 (ORF) 3b, ORF 6, and nucleocapsid proteins function as interferon antagonists. *J Virol*  
749 **81**:548-557.
- 750 8. **Weiss, S. R., and S. Navas-Martin.** 2005. Coronavirus pathogenesis and the emerging  
751 pathogen severe acute respiratory syndrome coronavirus. *Microbiol Mol Biol Rev*  
752 **69**:635-664.
- 753 9. **Cui, J., F. Li, and Z. L. Shi.** 2019. Origin and evolution of pathogenic coronaviruses. *Nat*  
754 *Rev Microbiol* **17**:181-192.
- 755 10. **Comar, C. E., S. A. Goldstein, Y. Li, B. Yount, R. S. Baric, and S. R. Weiss.** 2019.  
756 Antagonism of dsRNA-Induced Innate Immune Pathways by NS4a and NS4b Accessory  
757 Proteins during MERS Coronavirus Infection. *MBio* **10**.
- 758 11. **Zhao, L., B. K. Jha, A. Wu, R. Elliott, J. Ziebuhr, A. E. Gorbalenya, R. H. Silverman,**  
759 **and S. R. Weiss.** 2012. Antagonism of the interferon-induced OAS-RNase L pathway by  
760 murine coronavirus ns2 protein is required for virus replication and liver pathology. *Cell*  
761 *Host Microbe* **11**:607-616.
- 762 12. **Kikkert, M.** 2020. Innate Immune Evasion by Human Respiratory RNA Viruses. *J Innate*  
763 *Immunol* **12**:4-20.
- 764 13. **Sola, I., F. Almazan, S. Zuniga, and L. Enjuanes.** 2015. Continuous and Discontinuous  
765 RNA Synthesis in Coronaviruses. *Annu Rev Virol* **2**:265-288.
- 766 14. **Hur, S.** 2019. Double-Stranded RNA Sensors and Modulators in Innate Immunity. *Annu*  
767 *Rev Immunol* **37**:349-375.
- 768 15. **Roth-Cross, J. K., S. J. Bender, and S. R. Weiss.** 2008. Murine coronavirus mouse  
769 hepatitis virus is recognized by MDA5 and induces type I interferon in brain  
770 macrophages/microglia. *J Virol* **82**:9829-9838.
- 771 16. **Platanias, L. C.** 2005. Mechanisms of type-I- and type-II-interferon-mediated signalling.  
772 *Nat Rev Immunol* **5**:375-386.
- 773 17. **Lopusna, K., I. Rezuchova, T. Betakova, L. Skovranova, J. Tomaskova, L.**  
774 **Lukacikova, and P. Kabat.** 2013. Interferons lambda, new cytokines with antiviral  
775 activity. *Acta Virol* **57**:171-179.
- 776 18. **Whelan, J. N., Y. Li, R. H. Silverman, and S. R. Weiss.** 2019. Zika Virus Production Is  
777 Resistant to RNase L Antiviral Activity. *J Virol* **93**.
- 778 19. **Li, Y., S. Banerjee, Y. Wang, S. A. Goldstein, B. Dong, C. Gaughan, R. H.**  
779 **Silverman, and S. R. Weiss.** 2016. Activation of RNase L is dependent on OAS3  
780 expression during infection with diverse human viruses. *Proc Natl Acad Sci U S A*  
781 **113**:2241-2246.
- 782 20. **Dong, B., and R. H. Silverman.** 1995. 2-5A-dependent RNase molecules dimerize  
783 during activation by 2-5A. *J Biol Chem* **270**:4133-4137.
- 784 21. **Sadler, A. J., and B. R. Williams.** 2008. Interferon-inducible antiviral effectors. *Nat Rev*  
785 *Immunol* **8**:559-568.
- 786 22. **Chakrabarti, A., S. Banerjee, L. Franchi, Y. M. Loo, M. Gale, Jr., G. Nunez, and R. H.**  
787 **Silverman.** 2015. RNase L activates the NLRP3 inflammasome during viral infections.  
788 *Cell Host Microbe* **17**:466-477.
- 789 23. **Zhou, A., J. Paranjape, T. L. Brown, H. Nie, S. Naik, B. Dong, A. Chang, B. Trapp, R.**  
790 **Fairchild, C. Colmenares, and R. H. Silverman.** 1997. Interferon action and apoptosis  
791 are defective in mice devoid of 2',5'-oligoadenylate-dependent RNase L. *EMBO J*  
792 **16**:6355-6363.
- 793 24. **Kang, R., and D. Tang.** 2012. PKR-dependent inflammatory signals. *Sci Signal* **5**:pe47.
- 794 25. **Castelli, J. C., B. A. Hassel, K. A. Wood, X. L. Li, K. Amemiya, M. C. Dalakas, P. F.**  
795 **Torrence, and R. J. Youle.** 1997. A study of the interferon antiviral mechanism:  
796 apoptosis activation by the 2-5A system. *J Exp Med* **186**:967-972.

- 797 26. **Banerjee, S., A. Chakrabarti, B. K. Jha, S. R. Weiss, and R. H. Silverman.** 2014. Cell-  
798 type-specific effects of RNase L on viral induction of beta interferon. *MBio* 5:e00856-  
799 00814.
- 800 27. **Malathi, K., B. Dong, M. Gale, Jr., and R. H. Silverman.** 2007. Small self-RNA  
801 generated by RNase L amplifies antiviral innate immunity. *Nature* 448:816-819.
- 802 28. **Bastard, P., L. B. Rosen, Q. Zhang, E. Michailidis, H. H. Hoffmann, Y. Zhang, K.**  
803 **Dorgham, Q. Philippot, J. Rosain, V. Beziat, J. Manry, E. Shaw, L. Haljasmagi, P.**  
804 **Peterson, L. Lorenzo, L. Bizien, S. Trouillet-Assant, K. Dobbs, A. A. de Jesus, A.**  
805 **Belot, A. Kallaste, E. Catherinot, Y. Tandjaoui-Lambiotte, J. Le Pen, G. Kerner, B.**  
806 **Bigio, Y. Seeleuthner, R. Yang, A. Bolze, A. N. Spaan, O. M. Delmonte, M. S. Abers,**  
807 **A. Aiuti, G. Casari, V. Lampasona, L. Piemonti, F. Ciceri, K. Bilguvar, R. P. Lifton,**  
808 **M. Vasse, D. M. Smadja, M. Migaud, J. Hadjadj, B. Terrier, D. Duffy, L. Quintana-**  
809 **Murci, D. van de Beek, L. Roussel, D. C. Vinh, S. G. Tangye, F. Haerynck, D.**  
810 **Dalmau, J. Martinez-Picado, P. Brodin, M. C. Nussenzweig, S. Boisson-Dupuis, C.**  
811 **Rodriguez-Gallego, G. Vogt, T. H. Mogensen, A. J. Oler, J. Gu, P. D. Burbelo, J.**  
812 **Cohen, A. Biondi, L. R. Bettini, M. D'Angio, P. Bonfanti, P. Rossignol, J. Mayaux, F.**  
813 **Rieux-Laucat, E. S. Husebye, F. Fusco, M. V. Ursini, L. Imberti, A. Sottini, S.**  
814 **Paghera, E. Quiros-Roldan, C. Rossi, R. Castagnoli, D. Montagna, A. Licari, G. L.**  
815 **Marseglia, X. Duval, J. Ghosn, H. Lab, N.-U. I. R. t. C. Group, C. Clinicians, C.-S.**  
816 **Clinicians, C. G. Imagine, C. C. S. G. French, C. Milieu Interieur, V. C. C. Co, U. M.**  
817 **C. C.-B. Amsterdam, C. H. G. Effort, J. S. Tsang, R. Goldbach-Mansky, K. Kisand,**  
818 **M. S. Lionakis, A. Puel, S. Y. Zhang, et al.** 2020. Auto-antibodies against type I IFNs in  
819 patients with life-threatening COVID-19. *Science*.
- 820 29. **Zhang, Q., P. Bastard, Z. Liu, J. Le Pen, M. Moncada-Velez, J. Chen, M. Ogishi, I. K.**  
821 **D. Sabli, S. Hodeib, C. Korol, J. Rosain, K. Bilguvar, J. Ye, A. Bolze, B. Bigio, R.**  
822 **Yang, A. A. Arias, Q. Zhou, Y. Zhang, F. Onodi, S. Korniotis, L. Karpf, Q. Philippot,**  
823 **M. Chbihi, L. Bonnet-Madin, K. Dorgham, N. Smith, W. M. Schneider, B. S.**  
824 **Razooky, H. H. Hoffmann, E. Michailidis, L. Moens, J. E. Han, L. Lorenzo, L. Bizien,**  
825 **P. Meade, A. L. Neehus, A. C. Ugurbil, A. Corneau, G. Kerner, P. Zhang, F.**  
826 **Rapaport, Y. Seeleuthner, J. Manry, C. Masson, Y. Schmitt, A. Schluter, T. Le**  
827 **Voyer, T. Khan, J. Li, J. Fellay, L. Roussel, M. Shahrooei, M. F. Alosaimi, D.**  
828 **Mansouri, H. Al-Saud, F. Al-Mulla, F. Almourfi, S. Z. Al-Muhsen, F. Alsohime, S. Al**  
829 **Turki, R. Hasanato, D. van de Beek, A. Biondi, L. R. Bettini, M. D'Angio, P.**  
830 **Bonfanti, L. Imberti, A. Sottini, S. Paghera, E. Quiros-Roldan, C. Rossi, A. J. Oler,**  
831 **M. F. Tompkins, C. Alba, I. Vandernoot, J. C. Goffard, G. Smits, I. Migeotte, F.**  
832 **Haerynck, P. Soler-Palacin, A. Martin-Nalda, R. Colobran, P. E. Morange, S. Keles,**  
833 **F. Colkesen, T. Ozcelik, K. K. Yasar, S. Senoglu, S. N. Karabela, C. R. Gallego, G.**  
834 **Novelli, S. Hraiech, Y. Tandjaoui-Lambiotte, X. Duval, C. Laouenan, C.-S.**  
835 **Clinicians, C. Clinicians, C. G. Imagine, C. C. S. G. French, et al.** 2020. Inborn errors  
836 of type I IFN immunity in patients with life-threatening COVID-19. *Science*.
- 837 30. **Pairo-Castineira, E., S. Clohisey, L. Klaric, A. Bretherick, K. Rawlik, N. Parkinson,**  
838 **D. Pasko, S. Walker, A. Richmond, M. Head Fourman, A. Law, J. Furniss, E.**  
839 **Gountouna, N. Wrobel, C. D. Russell, L. Moutsianas, B. Wang, A. Meynert, Z. Yang,**  
840 **R. Zhai, C. Zheng, F. Griffith, W. Oosthuyzen, B. Shih, S. Keating, M. Zechner, C.**  
841 **Haley, D. J. Porteous, C. Hayward, J. Knight, C. Summers, M. Shankar-Hari, L.**  
842 **Turtle, A. Ho, C. Hinds, P. Horby, A. Nichol, D. Maslove, L. Ling, P. Klenerman, D.**  
843 **McAuley, H. Montgomery, T. Walsh, X. Shen, K. Rowan, A. Fawkes, L. Murphy, C.**  
844 **P. Ponting, A. Tenesa, M. Caulfield, R. Scott, P. J. M. Openshaw, M. G. Semple, V.**  
845 **Vitart, J. F. Wilson, and J. K. Baillie.** 2020. Genetic mechanisms of critical illness in  
846 Covid-19. medRxiv:2020.2009.2024.20200048.



- 847 31. **Hou, Y. J., K. Okuda, C. E. Edwards, D. R. Martinez, T. Asakura, K. H. Dinnon, 3rd,**  
848 **T. Kato, R. E. Lee, B. L. Yount, T. M. Mascenik, G. Chen, K. N. Olivier, A. Ghio, L. V.**  
849 **Tse, S. R. Leist, L. E. Gralinski, A. Schafer, H. Dang, R. Gilmore, S. Nakano, L. Sun,**  
850 **M. L. Fulcher, A. Livraghi-Butrico, N. I. Nicely, M. Cameron, C. Cameron, D. J.**  
851 **Kelvin, A. de Silva, D. M. Margolis, A. Markmann, L. Bartelt, R. Zumwalt, F. J.**  
852 **Martinez, S. P. Salvatore, A. Borczuk, P. R. Tata, V. Sontake, A. Kimple, I. Jaspers,**  
853 **W. K. O'Neal, S. H. Randell, R. C. Boucher, and R. S. Baric.** 2020. SARS-CoV-2  
854 Reverse Genetics Reveals a Variable Infection Gradient in the Respiratory Tract. *Cell*  
855 **182:429-446 e414.**
- 856 32. **Sharma, A., G. Garcia, Jr., Y. Wang, J. T. Plummer, K. Morizono, V.**  
857 **Arumugaswami, and C. N. Svendsen.** 2020. Human iPSC-Derived Cardiomyocytes  
858 Are Susceptible to SARS-CoV-2 Infection. *Cell Rep Med* **1:100052.**
- 859 33. **Turner, R. B., K. W. Weingand, C. H. Yeh, and D. W. Leedy.** 1998. Association  
860 between interleukin-8 concentration in nasal secretions and severity of symptoms of  
861 experimental rhinovirus colds. *Clin Infect Dis* **26:840-846.**
- 862 34. **Mukaida, N.** 2003. Pathophysiological roles of interleukin-8/CXCL8 in pulmonary  
863 diseases. *Am J Physiol Lung Cell Mol Physiol* **284:L566-577.**
- 864 35. **Stark, G. R., and J. E. Darnell, Jr.** 2012. The JAK-STAT pathway at twenty. *Immunity*  
865 **36:503-514.**
- 866 36. **Ng, D. L., F. Al Hosani, M. K. Keating, S. I. Gerber, T. L. Jones, M. G. Metcalfe, S.**  
867 **Tong, Y. Tao, N. N. Alami, L. M. Haynes, M. A. Mutei, L. Abdel-Wareth, T. M. Uyeki,**  
868 **D. L. Swerdlow, M. Barakat, and S. R. Zaki.** 2016. Clinicopathologic,  
869 Immunohistochemical, and Ultrastructural Findings of a Fatal Case of Middle East  
870 Respiratory Syndrome Coronavirus Infection in the United Arab Emirates, April 2014.  
871 *Am J Pathol* **186:652-658.**
- 872 37. **Qian, Z., E. A. Travanty, L. Oko, K. Edeen, A. Berglund, J. Wang, Y. Ito, K. V.**  
873 **Holmes, and R. J. Mason.** 2013. Innate immune response of human alveolar type II  
874 cells infected with severe acute respiratory syndrome-coronavirus. *Am J Respir Cell Mol*  
875 *Biol* **48:742-748.**
- 876 38. **Jacob, A., M. Vedaie, D. A. Roberts, D. C. Thomas, C. Villacorta-Martin, K. D.**  
877 **Alysandratos, F. Hawkins, and D. N. Kotton.** 2019. Derivation of self-renewing lung  
878 alveolar epithelial type II cells from human pluripotent stem cells. *Nat Protoc* **14:3303-**  
879 **3332.**
- 880 39. **Shi, S., M. Qin, B. Shen, Y. Cai, T. Liu, F. Yang, W. Gong, X. Liu, J. Liang, Q. Zhao,**  
881 **H. Huang, B. Yang, and C. Huang.** 2020. Association of Cardiac Injury With Mortality in  
882 Hospitalized Patients With COVID-19 in Wuhan, China. *JAMA Cardiol.*
- 883 40. **Lindner, D., A. Fitzek, H. Brauninger, G. Aleshcheva, C. Edler, K. Meissner, K.**  
884 **Scherschel, P. Kirchhof, F. Escher, H. P. Schultheiss, S. Blankenberg, K. Puschel,**  
885 **and D. Westermann.** 2020. Association of Cardiac Infection With SARS-CoV-2 in  
886 Confirmed COVID-19 Autopsy Cases. *JAMA Cardiol.*
- 887 41. **Qiu, Z., S. T. Hingley, G. Simmons, C. Yu, J. Das Sarma, P. Bates, and S. R. Weiss.**  
888 2006. Endosomal proteolysis by cathepsins is necessary for murine coronavirus mouse  
889 hepatitis virus type 2 spike-mediated entry. *J Virol* **80:5768-5776.**
- 890 42. **Gombold, J. L., S. T. Hingley, and S. R. Weiss.** 1993. Fusion-defective mutants of  
891 mouse hepatitis virus A59 contain a mutation in the spike protein cleavage signal. *J Virol*  
892 **67:4504-4512.**
- 893 43. **de Haan, C. A., K. Stadler, G. J. Godeke, B. J. Bosch, and P. J. Rottier.** 2004.  
894 Cleavage inhibition of the murine coronavirus spike protein by a furin-like enzyme affects  
895 cell-cell but not virus-cell fusion. *J Virol* **78:6048-6054.**

- 896 44. **Belouzard, S., V. C. Chu, and G. R. Whittaker.** 2009. Activation of the SARS  
897 coronavirus spike protein via sequential proteolytic cleavage at two distinct sites. *Proc*  
898 *Natl Acad Sci U S A* **106**:5871-5876.
- 899 45. **Yamada, Y., and D. X. Liu.** 2009. Proteolytic activation of the spike protein at a novel  
900 RRRR/S motif is implicated in furin-dependent entry, syncytium formation, and infectivity  
901 of coronavirus infectious bronchitis virus in cultured cells. *J Virol* **83**:8744-8758.
- 902 46. **Blanco-Melo, D., B. E. Nilsson-Payant, W. C. Liu, S. Uhl, D. Hoagland, R. Moller, T.**  
903 **X. Jordan, K. Oishi, M. Panis, D. Sachs, T. T. Wang, R. E. Schwartz, J. K. Lim, R. A.**  
904 **Albrecht, and B. R. tenOever.** 2020. Imbalanced Host Response to SARS-CoV-2  
905 Drives Development of COVID-19. *Cell* **181**:1036-1045 e1039.
- 906 47. **Thornbrough, J. M., B. K. Jha, B. Yount, S. A. Goldstein, Y. Li, R. Elliott, A. C.**  
907 **Sims, R. S. Baric, R. H. Silverman, and S. R. Weiss.** 2016. Middle East Respiratory  
908 Syndrome Coronavirus NS4b Protein Inhibits Host RNase L Activation. *MBio* **7**.
- 909 48. **Canton, J., A. R. Fehr, R. Fernandez-Delgado, F. J. Gutierrez-Alvarez, M. T.**  
910 **Sanchez-Aparicio, A. Garcia-Sastre, S. Perlman, L. Enjuanes, and I. Sola.** 2018.  
911 MERS-CoV 4b protein interferes with the NF-kappaB-dependent innate immune  
912 response during infection. *PLoS Pathog* **14**:e1006838.
- 913 49. **Knoops, K., M. Kikkert, S. H. Worm, J. C. Zevenhoven-Dobbe, Y. van der Meer, A.**  
914 **J. Koster, A. M. Mommaas, and E. J. Snijder.** 2008. SARS-coronavirus replication is  
915 supported by a reticulovesicular network of modified endoplasmic reticulum. *PLoS Biol*  
916 **6**:e226.
- 917 50. **Rabouw, H. H., M. A. Langereis, R. C. Knaap, T. J. Dalebout, J. Canton, I. Sola, L.**  
918 **Enjuanes, P. J. Bredenbeek, M. Kikkert, R. J. de Groot, and F. J. van Kuppeveld.**  
919 2016. Middle East Respiratory Coronavirus Accessory Protein 4a Inhibits PKR-Mediated  
920 Antiviral Stress Responses. *PLoS Pathog* **12**:e1005982.
- 921 51. **Lundin, A., R. Dijkman, T. Bergstrom, N. Kann, B. Adamiak, C. Hannoun, E.**  
922 **Kindler, H. R. Jonsdottir, D. Muth, J. Kint, M. Forlenza, M. A. Muller, C. Drosten, V.**  
923 **Thiel, and E. Trybala.** 2014. Targeting membrane-bound viral RNA synthesis reveals  
924 potent inhibition of diverse coronaviruses including the middle East respiratory syndrome  
925 virus. *PLoS Pathog* **10**:e1004166.
- 926 52. **Lokugamage, K. G., A. Hage, M. de Vries, A. M. Valero-Jimenez, C. Schindewolf, M.**  
927 **Dittmann, R. Rajsbaum, and V. D. Menachery.** 2020. Type I interferon susceptibility  
928 distinguishes SARS-CoV-2 from SARS-CoV. *J Virol*.
- 929 53. **Siu, K. L., M. L. Yeung, K. H. Kok, K. S. Yuen, C. Kew, P. Y. Lui, C. P. Chan, H. Tse,**  
930 **P. C. Woo, K. Y. Yuen, and D. Y. Jin.** 2014. Middle east respiratory syndrome  
931 coronavirus 4a protein is a double-stranded RNA-binding protein that suppresses PACT-  
932 induced activation of RIG-I and MDA5 in the innate antiviral response. *J Virol* **88**:4866-  
933 4876.
- 934 54. **Li, Y., S. Banerjee, S. A. Goldstein, B. Dong, C. Gaughan, S. Rath, J. Donovan, A.**  
935 **Korenykh, R. H. Silverman, and S. R. Weiss.** 2017. Ribonuclease L mediates the  
936 cell-lethal phenotype of double-stranded RNA editing enzyme ADAR1 deficiency in a  
937 human cell line. *Elife (Cambridge)* **6**.
- 938 55. **Li, Y., B. Dong, Z. Wei, R. H. Silverman, and S. R. Weiss.** 2019. Activation of RNase L  
939 in Egyptian Roussette Bat-Derived RoNi/7 Cells Is Dependent Primarily on OAS3 and  
940 Independent of MAVS Signaling. *MBio* **10**.
- 941 56. **Birdwell, L. D., Z. B. Zalinger, Y. Li, P. W. Wright, R. Elliott, K. M. Rose, R. H.**  
942 **Silverman, and S. R. Weiss.** 2016. Activation of RNase L by murine coronavirus in  
943 myeloid cells is dependent on basal Oas gene expression and independent of virus-  
944 induced interferon. *J Virol*.



- 945 57. **Sanche, S., Y. T. Lin, C. Xu, E. Romero-Severson, N. Hengartner, and R. Ke.** 2020.  
946 High Contagiousness and Rapid Spread of Severe Acute Respiratory Syndrome  
947 Coronavirus 2. *Emerg Infect Dis* **26**:1470-1477.
- 948 58. **Oh, M. D., W. B. Park, P. G. Choe, S. J. Choi, J. I. Kim, J. Chae, S. S. Park, E. C.**  
949 **Kim, H. S. Oh, E. J. Kim, E. Y. Nam, S. H. Na, D. K. Kim, S. M. Lee, K. H. Song, J. H.**  
950 **Bang, E. S. Kim, H. B. Kim, S. W. Park, and N. J. Kim.** 2016. Viral Load Kinetics of  
951 MERS Coronavirus Infection. *N Engl J Med* **375**:1303-1305.
- 952 59. **Zhou, P., X. L. Yang, X. G. Wang, B. Hu, L. Zhang, W. Zhang, H. R. Si, Y. Zhu, B. Li,**  
953 **C. L. Huang, H. D. Chen, J. Chen, Y. Luo, H. Guo, R. D. Jiang, M. Q. Liu, Y. Chen, X.**  
954 **R. Shen, X. Wang, X. S. Zheng, K. Zhao, Q. J. Chen, F. Deng, L. L. Liu, B. Yan, F. X.**  
955 **Zhan, Y. Y. Wang, G. F. Xiao, and Z. L. Shi.** 2020. A pneumonia outbreak associated  
956 with a new coronavirus of probable bat origin. *Nature*.
- 957 60. **Lu, R., X. Zhao, J. Li, P. Niu, B. Yang, H. Wu, W. Wang, H. Song, B. Huang, N. Zhu,**  
958 **Y. Bi, X. Ma, F. Zhan, L. Wang, T. Hu, H. Zhou, Z. Hu, W. Zhou, L. Zhao, J. Chen, Y.**  
959 **Meng, J. Wang, Y. Lin, J. Yuan, Z. Xie, J. Ma, W. J. Liu, D. Wang, W. Xu, E. C.**  
960 **Holmes, G. F. Gao, G. Wu, W. Chen, W. Shi, and W. Tan.** 2020. Genomic  
961 characterisation and epidemiology of 2019 novel coronavirus: implications for virus  
962 origins and receptor binding. *Lancet* **395**:565-574.
- 963 61. **Wan, Y., J. Shang, R. Graham, R. S. Baric, and F. Li.** 2020. Receptor recognition by  
964 novel coronavirus from Wuhan: An analysis based on decade-long structural studies of  
965 SARS. *J Virol*.
- 966 62. **Bender, S. J., J. M. Phillips, E. P. Scott, and S. R. Weiss.** 2010. Murine coronavirus  
967 receptors are differentially expressed in the central nervous system and play virus strain-  
968 dependent roles in neuronal spread. *J Virol* **84**:11030-11044.
- 969 63. **Channappanavar, R., and S. Perlman.** 2017. Pathogenic human coronavirus  
970 infections: causes and consequences of cytokine storm and immunopathology. *Semin*  
971 *Immunopathol* **39**:529-539.
- 972 64. **Arabi, Y. M., H. H. Balkhy, F. G. Hayden, A. Bouchama, T. Luke, J. K. Baillie, A. Al-**  
973 **Omari, A. H. Hajeer, M. Senga, M. R. Denison, J. S. Nguyen-Van-Tam, N. Shindo, A.**  
974 **Birmingham, J. D. Chappell, M. D. Van Kerkhove, and R. A. Fowler.** 2017. Middle  
975 East Respiratory Syndrome. *N Engl J Med* **376**:584-594.
- 976 65. **Channappanavar, R., A. R. Fehr, J. Zheng, C. Wohlford-Lenane, J. E. Abrahante, M.**  
977 **Mack, R. Sompallae, P. B. McCray, Jr., D. K. Meyerholz, and S. Perlman.** 2019. IFN-I  
978 response timing relative to virus replication determines MERS coronavirus infection  
979 outcomes. *J Clin Invest* **129**:3625-3639.
- 980 66. **Channappanavar, R., A. R. Fehr, R. Vijay, M. Mack, J. Zhao, D. K. Meyerholz, and S.**  
981 **Perlman.** 2016. Dysregulated Type I Interferon and Inflammatory Monocyte-  
982 Macrophage Responses Cause Lethal Pneumonia in SARS-CoV-Infected Mice. *Cell*  
983 *Host Microbe* **19**:181-193.
- 984 67. **Hadjadj, J., N. Yatim, L. Barnabei, A. Corneau, J. Boussier, N. Smith, H. Pere, B.**  
985 **Charbit, V. Bondet, C. Chenevier-Gobeaux, P. Breillat, N. Carlier, R. Gauzit, C.**  
986 **Morbieu, F. Pene, N. Marin, N. Roche, T. A. Szwebel, S. H. Merklings, J. M. Treluyer,**  
987 **D. Veyer, L. Mouthon, C. Blanc, P. L. Tharaux, F. Rozenberg, A. Fischer, D. Duffy,**  
988 **F. Rieux-Laucat, S. Kerneis, and B. Terrier.** 2020. Impaired type I interferon activity  
989 and inflammatory responses in severe COVID-19 patients. *Science*.
- 990 68. **Giamarellos-Bourboulis, E. J., M. G. Netea, N. Rovina, K. Akinosoglou, A.**  
991 **Antoniadou, N. Antonakos, G. Damoraki, T. Gkavogianni, M. E. Adami, P.**  
992 **Katsaounou, M. Ntaganou, M. Kyriakopoulou, G. Dimopoulos, I.**  
993 **Koutsodimitropoulos, D. Velissaris, P. Koufargyris, A. Karageorgos, K. Katrini, V.**  
994 **Lekakis, M. Lupse, A. Kotsaki, G. Renieris, D. Theodoulou, V. Panou, E. Koukaki,**  
995 **N. Koulouris, C. Gogos, and A. Koutsoukou.** 2020. Complex Immune Dysregulation

- 996 in COVID-19 Patients with Severe Respiratory Failure. *Cell Host Microbe* **27**:992-1000  
997 e1003.
- 998 69. **Ye, Y., K. Hauns, J. O. Langland, B. L. Jacobs, and B. G. Hogue.** 2007. Mouse  
999 hepatitis coronavirus A59 nucleocapsid protein is a type I interferon antagonist. *J Virol*  
1000 **81**:2554-2563.
- 1001 70. **Zhao, L., K. M. Rose, R. Elliott, N. Van Rooijen, and S. R. Weiss.** 2011. Cell-type-  
1002 specific type I interferon antagonism influences organ tropism of murine coronavirus. *J*  
1003 *Virol* **85**:10058-10068.
- 1004 71. **Zhao, L., L. D. Birdwell, A. Wu, R. Elliott, K. M. Rose, J. M. Phillips, Y. Li, J.**  
1005 **Grinspan, R. H. Silverman, and S. R. Weiss.** 2013. Cell-type-specific activation of the  
1006 oligoadenylate synthetase-RNase L pathway by a murine coronavirus. *J Virol* **87**:8408-  
1007 8418.
- 1008 72. **Li, Y., and S. R. Weiss.** 2016. Antagonism of RNase L Is Required for Murine  
1009 Coronavirus Replication in Kupffer Cells and Liver Sinusoidal Endothelial Cells but Not in  
1010 Hepatocytes. *J Virol* **90**:9826-9832.
- 1011 73. **Galani, I. E., V. Triantafyllia, E. E. Eleminiadou, O. Koltsida, A. Stavropoulos, M.**  
1012 **Manioudaki, D. Thanos, S. E. Doyle, S. V. Kottenko, K. Thanopoulou, and E.**  
1013 **Andreakos.** 2017. Interferon-lambda Mediates Non-redundant Front-Line Antiviral  
1014 Protection against Influenza Virus Infection without Compromising Host Fitness.  
1015 *Immunity* **46**:875-890 e876.
- 1016 74. **Ank, N., M. B. Iversen, C. Bartholdy, P. Staeheli, R. Hartmann, U. B. Jensen, F.**  
1017 **Dagnaes-Hansen, A. R. Thomsen, Z. Chen, H. Haugen, K. Klucher, and S. R.**  
1018 **Paludan.** 2008. An important role for type III interferon (IFN-lambda/IL-28) in TLR-  
1019 induced antiviral activity. *J Immunol* **180**:2474-2485.
- 1020 75. **Forero, A., S. Ozarkar, H. Li, C. H. Lee, E. A. Hemann, M. S. Nadsombati, M. R.**  
1021 **Hendricks, L. So, R. Green, C. N. Roy, S. N. Sarkar, J. von Moltke, S. K. Anderson,**  
1022 **M. Gale, Jr., and R. Savan.** 2019. Differential Activation of the Transcription Factor  
1023 IRF1 Underlies the Distinct Immune Responses Elicited by Type I and Type III  
1024 Interferons. *Immunity* **51**:451-464 e456.
- 1025 76. **Uhlén, M., L. Fagerberg, B. M. Hallström, C. Lindskog, P. Oksvold, A. Mardinoglu,**  
1026 **Å. Sivertsson, C. Kampf, E. Sjöstedt, A. Asplund, I. Olsson, K. Edlund, E.**  
1027 **Lundberg, S. Navani, C. A. Szigartyo, J. Odeberg, D. Djureinovic, J. O. Takanen, S.**  
1028 **Hober, T. Alm, P. H. Edqvist, H. Berling, H. Tegel, J. Mulder, J. Rockberg, P.**  
1029 **Nilsson, J. M. Schwenk, M. Hamsten, K. von Feilitzen, M. Forsberg, L. Persson, F.**  
1030 **Johansson, M. Zwahlen, G. von Heijne, J. Nielsen, and F. Pontén.** 2015. Proteomics.  
1031 Tissue-based map of the human proteome. *Science* **347**:1260419.
- 1032 77. **Miorin, L., T. Kehrer, M. T. Sanchez-Aparicio, K. Zhang, P. Cohen, R. S. Patel, A.**  
1033 **Cupic, T. Makio, M. Mei, E. Moreno, O. Danziger, K. M. White, R. Rathnasinghe, M.**  
1034 **Uccellini, S. Gao, T. Aydililo, I. Mena, X. Yin, L. Martin-Sancho, N. J. Krogan, S. K.**  
1035 **Chanda, M. Schotsaert, R. W. Wozniak, Y. Ren, B. R. Rosenberg, B. M. A.**  
1036 **Fontoura, and A. García-Sastre.** 2020. SARS-CoV-2 Orf6 hijacks Nup98 to block  
1037 STAT nuclear import and antagonize interferon signaling. *Proceedings of the National*  
1038 *Academy of Sciences*:202016650.
- 1039 78. **Gordon, D. E., G. M. Jang, M. Bouhaddou, J. Xu, K. Obernier, K. M. White, M. J.**  
1040 **O'Meara, V. V. Rezelj, J. Z. Guo, D. L. Swaney, T. A. Tummino, R. Huttenhain, R. M.**  
1041 **Kaake, A. L. Richards, B. Tutuncuoglu, H. Foussard, J. Batra, K. Haas, M. Modak,**  
1042 **M. Kim, P. Haas, B. J. Polacco, H. Braberg, J. M. Fabius, M. Eckhardt, M.**  
1043 **Soucheray, M. J. Bennett, M. Cakir, M. J. McGregor, Q. Li, B. Meyer, F. Roesch, T.**  
1044 **Vallet, A. Mac Kain, L. Miorin, E. Moreno, Z. Z. C. Naing, Y. Zhou, S. Peng, Y. Shi, Z.**  
1045 **Zhang, W. Shen, I. T. Kirby, J. E. Melnyk, J. S. Chorba, K. Lou, S. A. Dai, I. Barrio-**  
1046 **Hernandez, D. Memon, C. Hernandez-Armenta, J. Lyu, C. J. P. Mathy, T. Perica, K.**

- 1047 **B. Pilla, S. J. Ganesan, D. J. Saltzberg, R. Rakesh, X. Liu, S. B. Rosenthal, L.**  
1048 **Calviello, S. Venkataramanan, J. Liboy-Lugo, Y. Lin, X. P. Huang, Y. Liu, S. A.**  
1049 **Wankowicz, M. Bohn, M. Safari, F. S. Ugur, C. Koh, N. S. Savar, Q. D. Tran, D.**  
1050 **Shengjuler, S. J. Fletcher, M. C. O'Neal, Y. Cai, J. C. J. Chang, D. J. Broadhurst, S.**  
1051 **Klippsten, P. P. Sharp, N. A. Wenzell, D. Kuzuoglu-Ozturk, H. Y. Wang, R. Trenker,**  
1052 **J. M. Young, D. A. Caverio, J. Hiatt, T. L. Roth, U. Rathore, A. Subramanian, J.**  
1053 **Noack, M. Hubert, R. M. Stroud, A. D. Frankel, O. S. Rosenberg, K. A. Verba, D. A.**  
1054 **Agard, M. Ott, M. Emerman, N. Jura, et al. 2020. A SARS-CoV-2 protein interaction**  
1055 **map reveals targets for drug repurposing. Nature 583:459-468.**  
1056 79. **Volk, A., M. Hackbart, X. Deng, Y. Cruz-Pulido, A. O'Brien, and S. C. Baker. 2020.**  
1057 **Coronavirus Endoribonuclease and Deubiquitinating Interferon Antagonists Differentially**  
1058 **Modulate the Host Response during Replication in Macrophages. J Virol 94.**  
1059 80. **Kindler, E., C. Gil-Cruz, J. Spanier, Y. Li, J. Wilhelm, H. H. Rabouw, R. Züst, M.**  
1060 **Hwang, P. V'Kovski, H. Stalder, S. Marti, M. Habjan, L. Cervantes-Barragan, R.**  
1061 **Elliot, N. Karl, C. Gaughan, F. J. van Kuppeveld, R. H. Silverman, M. Keller, B.**  
1062 **Ludewig, C. C. Bergmann, J. Ziebuhr, S. R. Weiss, U. Kalinke, and V. Thiel. 2017.**  
1063 **Early endonuclease-mediated evasion of RNA sensing ensures efficient coronavirus**  
1064 **replication. PLoS Pathog 13:e1006195.**  
1065 81. **Deng, X., M. Hackbart, R. C. Mettelman, A. O'Brien, A. M. Mielech, G. Yi, C. C. Kao,**  
1066 **and S. C. Baker. 2017. Coronavirus nonstructural protein 15 mediates evasion of**  
1067 **dsRNA sensors and limits apoptosis in macrophages. Proc Natl Acad Sci U S A**  
1068 **114:E4251-E4260.**  
1069 82. **Krahling, V., D. A. Stein, M. Spiegel, F. Weber, and E. Muhlberger. 2009. Severe**  
1070 **acute respiratory syndrome coronavirus triggers apoptosis via protein kinase R but is**  
1071 **resistant to its antiviral activity. J Virol 83:2298-2309.**  
1072 83. **Suthar, M. S., R. Shabman, K. Madric, C. Lambeth, and M. T. Heise. 2005.**  
1073 **Identification of adult mouse neurovirulence determinants of the Sindbis virus strain**  
1074 **AR86. J Virol 79:4219-4228.**  
1075 84. **Basler, C. F., A. Mikulasova, L. Martinez-Sobrido, J. Paragas, E. Muhlberger, M.**  
1076 **Bray, H. D. Klenk, P. Palese, and A. Garcia-Sastre. 2003. The Ebola virus VP35**  
1077 **protein inhibits activation of interferon regulatory factor 3. J Virol 77:7945-7956.**  
1078 85. **Lee, R. J., B. M. Hariri, D. B. McMahon, B. Chen, L. Doghramji, N. D. Adappa, J. N.**  
1079 **Palmer, D. W. Kennedy, P. Jiang, R. F. Margolskee, and N. A. Cohen. 2017.**  
1080 **Bacterial d-amino acids suppress sinonasal innate immunity through sweet taste**  
1081 **receptors in solitary chemosensory cells. Sci Signal 10.**  
1082 86. **Lee, R. J., J. M. Kofonow, P. L. Rosen, A. P. Siebert, B. Chen, L. Doghramji, G.**  
1083 **Xiong, N. D. Adappa, J. N. Palmer, D. W. Kennedy, J. L. Kreindler, R. F.**  
1084 **Margolskee, and N. A. Cohen. 2014. Bitter and sweet taste receptors regulate human**  
1085 **upper respiratory innate immunity. J Clin Invest 124:1393-1405.**  
1086 87. **Yang, W., Y. Liu, K. J. Slovik, J. C. Wu, S. A. Duncan, D. J. Rader, and E. E.**  
1087 **Morrissey. 2015. Generation of iPSCs as a Pooled Culture Using Magnetic Activated Cell**  
1088 **Sorting of Newly Reprogrammed Cells. PLoS One 10:e0134995.**  
1089 88. **Pashos, E. E., Y. Park, X. Wang, A. Raghavan, W. L. Yang, D. Abbey, D. T. Peters,**  
1090 **J. Arbelaez, M. Hernandez, N. Kuperwasser, W. J. Li, Z. R. Lian, Y. Liu, W. J. Lv, S.**  
1091 **L. Lytle-Gabbin, D. H. Marchadier, P. Rogov, J. T. Shi, K. J. Slovik, I. M. Stylianou,**  
1092 **L. Wang, R. L. Yan, X. L. Zhang, S. Kathiresan, S. A. Duncan, T. S. Mikkelsen, E. E.**  
1093 **Morrissey, D. J. Rader, C. D. Brown, and K. Musunuru. 2017. Large, Diverse**  
1094 **Population Cohorts of hiPSCs and Derived Hepatocyte-like Cells Reveal Functional**  
1095 **Genetic Variation at Blood Lipid-Associated Loci. Cell Stem Cell 20:558-+.**  
1096 89. **Palpant, N. J., L. Pabon, C. E. Friedman, M. Roberts, B. Hadland, R. J.**  
1097 **Zaunbrecher, I. Bernstein, Y. Zheng, and C. E. Murry. 2017. Generating high-purity**

- 1098 cardiac and endothelial derivatives from patterned mesoderm using human pluripotent  
1099 stem cells. *Nat Protoc* **12**:15-31.
- 1100 90. **Laflamme, M. A., K. Y. Chen, A. V. Naumova, V. Muskheli, J. A. Fugate, S. K.**  
1101 **Dupras, H. Reinecke, C. Xu, M. Hassanipour, S. Police, C. O'Sullivan, L. Collins, Y.**  
1102 **Chen, E. Minami, E. A. Gill, S. Ueno, C. Yuan, J. Gold, and C. E. Murry.** 2007.  
1103 Cardiomyocytes derived from human embryonic stem cells in pro-survival factors  
1104 enhance function of infarcted rat hearts. *Nat Biotechnol* **25**:1015-1024.
- 1105 91. **Scobey, T., B. L. Yount, A. C. Sims, E. F. Donaldson, S. S. Agnihothram, V. D.**  
1106 **Menachery, R. L. Graham, J. Swanstrom, P. F. Bove, J. D. Kim, S. Grego, S. H.**  
1107 **Randell, and R. S. Baric.** 2013. Reverse genetics with a full-length infectious cDNA of  
1108 the Middle East respiratory syndrome coronavirus. *Proc Natl Acad Sci U S A* **110**:16157-  
1109 16162.
- 1110

1111

## 1112 **Figure Legends**

1113 **Figure 1. Double-stranded RNA induced innate immune responses during SARS-CoV-2**  
1114 **infection.** Coronavirus double-stranded RNA (dsRNA) is produced through replication and  
1115 transcription and recognized by cytosolic OAS, MDA5, or PKR host receptors to activate innate  
1116 immune pathways. MDA5 signals through MAVS, leading to type I and type III IFN production and  
1117 release from the cell where it binds to cell surface receptors, which induces phosphorylation and  
1118 heterodimerization of STAT1 and STAT2 that then prompt ISG transcription and cytokine  
1119 responses. OASs produce 2'-5'-oligoadenylates (2-5A) that bind RNase L, leading to  
1120 homodimerization and catalytic activation of RNase L, which cleaves host and viral ssRNA to  
1121 trigger apoptosis and inflammation. PKR autophosphorylates before phosphorylating eIF2 $\alpha$ ,  
1122 which leads to translational arrest, cell death, and inflammatory responses. Graphic was created  
1123 with Biorender.com

1124

1125

1126 **Figure 2. Infection of nasal epithelia-derived cells by SARS-CoV-2 and MERS-CoV.** Nasal  
1127 cells were cultured in air-liquid trans-wells, and mock infected or infected with SARS-CoV-2  
1128 (MOI=5), MERS-CoV (MOI=5) , or Sendai Virus (SeV), MOI=10, apically. (A) At indicated times,  
1129 apically released virus was quantified by plaque assay on Vero-E6 cells. Values are means  $\pm$  SD

1130 (error bars). Statistical significance (not displayed) was determined by two-way ANOVA (\*,  $P <$   
1131 0.05). One experiment was performed using four separate donors. (B) At 48 hpi, nasal cells were  
1132 fixed with 4% PFA and permeabilized. Expression of nucleocapsid (N) protein (red) of SARS-  
1133 CoV-2 and MERS-CoV was detected with an anti-N antibody, and cilia (green) with an anti-type  
1134 IV  $\beta$ -tubulin antibody by immunofluorescence assay (IFA). One representative image is shown  
1135 from at least three independent experiments, with four donors for each virus infection shown.  
1136 Scale bar = 100 $\mu$ m. (C) At 120 hpi, cells were lysed, and proteins were analyzed by  
1137 immunoblotting with antibodies as indicated. One experiment using three separate donors was  
1138 performed. (D) At 120 hpi, total RNA was harvested, and the mRNA expression level of *IFNB*,  
1139 *IFNL1*, *OAS2*, *IFIT1*, *IFIH1*, *CXCL8* was quantified by RT-qPCR. Cycle threshold ( $C_T$ ) values were  
1140 normalized to 18S rRNA to generate  $\Delta C_T$  values ( $\Delta C_T = C_T$  gene of interest -  $C_T$  18S rRNA). Fold  
1141 change over mock values were calculated by subtracting mock infected  $\Delta C_T$  values from virus  
1142 infected  $\Delta C_T$  values, displayed as  $2^{-\Delta(\Delta C_T)}$ . Technical replicates were averaged, the means for each  
1143 replicate displayed,  $\pm$  SD (error bars). One experiment was performed using three separate donor  
1144 samples. (E) Total RNA was harvested from two donors at 120 hpi and rRNA integrity determined  
1145 by Bioanalyzer. The position of 28S and 18S rRNA and indicated. Data shown are from one  
1146 representative experiment of two independent experiments. (See also Figures S1A&S2).

1147

1148 **Figure 3. Infection of iPSC-derived AT2 cells (iAT2) by SARS-CoV-2.** iAT2 cells were mock  
1149 infected or infected with SARS-CoV-2 at MOI=5 or SINV at MOI=1. (A) At indicated times,  
1150 supernatants were collected and infectious virus was quantified by plaque assay on Vero-E6 cells.  
1151 Values are means  $\pm$  SD (error bars). Data shown are one representative experiment from at least  
1152 three independent experiments. (B) At 48 hpi, cells were fixed with 4% PFA and permeabilized.  
1153 Expression of nucleocapsid (N) protein (green) of SARS-CoV-2 and the expression of SFTPC  
1154 promoter control tdTomato fluorescent protein (AT2 marker in red) was examined by IFA.



1155 Channels are merged with DAPI nuclear staining. Images shown are representative from at least  
1156 three independent experiments. Scale bar = 100 $\mu$ m. (C) At 48 hours post infection, cells were  
1157 lysed and proteins were analyzed by immunoblotting with antibodies as indicated. Data shown are  
1158 from one representative experiment of two independent experiments. (D) At 16 (SINV) or 48 (SARS-  
1159 CoV-2) hpi, total RNA was harvested, and the mRNA expression level of *IFNB*, *IFNL1*, *OAS2*,  
1160 *IFIT1*, *IFIH1*, *CXCL8* was quantified by RT-qPCR.  $C_T$  values were normalized to 18S rRNA to  
1161 generate  $\Delta C_T$  values ( $\Delta C_T = C_T$  gene of interest -  $C_T$  18S rRNA). Fold change over mock values  
1162 were calculated by subtracting mock infected  $\Delta C_T$  values from virus infected  $\Delta C_T$  values,  
1163 displayed as  $2^{-\Delta(\Delta C_T)}$ . Technical replicates were averaged, the means for each replicate displayed,  
1164  $\pm$  SD (error bars). Statistical significance was determined by Student *t* test (\*,  $P < 0.05$ ; \*\*,  $P <$   
1165  $0.01$ ; \*\*\*,  $P < 0.001$ ). Data shown are from one representative experiment of two independent  
1166 experiments. (E) Total RNA was harvested at 16 (SINV) or 48 (SARS-CoV-2) hpi and rRNA integrity  
1167 determined by Bioanalyzer. The position of 28S and 18S rRNA and indicated. Data shown are from  
1168 one representative experiment of two independent experiments. (See also Figures S1B&S2).

1169

1170 **Figure 4. Infection of iPSC-derived cardiomyocytes (iCM) by SARS-CoV-2.** iCM were mock  
1171 infected or infected at MOI=1 with SARS-CoV-2 or SINV. (A) At indicated times, supernatants  
1172 were collected and virus quantified by plaque assay on Vero-E6 cells. Values are means  $\pm$  SD  
1173 (error bars). Data shown are one representative experiment from at least three independent  
1174 experiments. (B) At 48 hpi, iCM were fixed with 4% PFA and permeabilized, the expression of  
1175 SARS-CoV-2 N (green) of and of cTnT protein (cardiomyocyte marker, red) was examined by  
1176 IFA. Channels are merged with DAPI nuclear staining. Images shown are representative from  
1177 three independent experiments. Scale bar = 50 $\mu$ m. (C) At 16 (SINV) or 48 (SARS-CoV-2) hpi,  
1178 cells were lysed and proteins were analyzed by immunoblotting with antibodies as indicated.  
1179 Immunoblots were performed at least two times and one representative blot is shown. (D) At 16

1180 (SINV) or 48 (SARS-CoV-2) hpi, total RNA was harvested, the mRNA expression level of *IFNB*,  
1181 *IFNL1*, *OAS2*, *IFIT1*, *IFIH1*, *CXCL8* was quantified by RT-qPCR.  $C_T$  values were normalized to  
1182 18S rRNA to generate  $\Delta C_T$  values ( $\Delta C_T = C_T$  gene of interest -  $C_T$  18S rRNA). Fold change over  
1183 mock values were calculated by subtracting mock infected  $\Delta C_T$  values from virus infected  $\Delta C_T$   
1184 values, displayed as  $2^{-\Delta(\Delta C_T)}$ . Technical replicates were averaged, the means for each replicate  
1185 displayed,  $\pm$  SD (error bars). Statistical significance was determined by Student *t* test (\*,  $P < 0.05$ ;  
1186 \*\*\*\*,  $P < 0.0001$ ; ns = not significant). Data shown are from one representative experiment of two  
1187 independent experiments. (E) Total RNA was harvested at 16 (SINV) or 48 (SARS-CoV-2) hpi, and  
1188 rRNA integrity determined by Bioanalyzer. The position of 28S and 18S rRNA and indicated. Data  
1189 shown are from one representative experiment of two independent experiments. (See also Figures  
1190 S1C&S2).

1191

1192 **Figure 5. Replication of SARS-CoV-2 in A549<sup>ACE2</sup> and Calu-3 cell lines.** (A) Vero-E6 or  
1193 A549<sup>ACE2</sup> (clone 44) cells were infected with SARS-CoV-2 at MOI=1. At the indicated times,  
1194 supernatant was collected and virus quantified by plaque assay on Vero-E6 cells. Values are  
1195 means  $\pm$  SD (error bars). (B) Calu-3 cells were infected with SARS-CoV-2, MERS-CoV or MERS-  
1196 CoV- $\Delta$ NS4ab at MOI=1. Supernatant was collected at the indicated times and virus quantified by  
1197 plaque assay on Vero-E6 cells (SARS-CoV-2) or VeroCCL81 cells (MERS-CoV and MERS-CoV-  
1198  $\Delta$ 4ab). Values represent means  $\pm$  SEM (error bars). Statistical significance was determined by  
1199 Student *t* test (\*\*,  $P < 0.01$ ). Data shown are one representative experiment of three independent  
1200 experiments. (C) Vero-E6, A549<sup>ACE2</sup> (clone 34), and Calu-3 cells were grown on untreated (Vero-  
1201 E6 and A549<sup>ACE2</sup>) or collagen-coated (Calu-3) glass coverslips before infection with SARS-CoV-  
1202 2 at MOI = 1. At indicated hpi, cells were fixed with 4% PFA and permeabilized for N (green) and  
1203 dsRNA (red) expression detection by IFA using anti-N and J2 antibodies, respectively. Channels



1204 are merged with DAPI nuclear staining. Images shown are representative from two independent  
1205 experiments. Scale bar = 25 $\mu$ m. (See also Figure S3&S4A).

1206

1207 **Figure 6. SARS-CoV-2 IFN responses in the lung epithelia-derived A549<sup>ACE2</sup> cell line.**

1208 A549<sup>ACE2</sup> cells were mock infected or infected with SINV (MOI=1) or SARS-CoV-2 (MOI=5). (A)  
1209 Total RNA was harvested at 24 and 48 hpi. Expression of *IFNB*, *IFNL1*, *OAS2*, *IFIT1*, *IFIH1*, and  
1210 *CXCL8* mRNA was quantified by RT-qPCR.  $C_T$  values were normalized to 18S rRNA to generate  
1211  $\Delta C_T$  values ( $\Delta C_T = C_T$  gene of interest -  $C_T$  18S rRNA). Fold change over mock values were  
1212 calculated by subtracting mock infected  $\Delta C_T$  values from virus infected  $\Delta C_T$  values, displayed as  
1213  $2^{-\Delta(\Delta C_T)}$ . Technical replicates were averaged, the means for each replicate displayed,  $\pm$  SD (error  
1214 bars). (B) Viral genome copies per  $\mu$ g of total RNA were calculated at 24 and 48hpi by RT-qPCR  
1215 standard curve generated using a digested plasmid encoding SARS-CoV-2 nsp12. Values are  
1216 means  $\pm$  SD (error bars). Statistical significance was determined by one-way ANOVA (\*,  $P < 0.05$ ;  
1217 \*\*,  $P < 0.01$ ; \*\*\*,  $P < 0.001$ ; \*\*\*\*,  $P < 0.0001$ ; ns = not significant). (C) At 24 hpi, A549<sup>ACE2</sup> cells  
1218 were lysed and proteins harvested. Protein expression was analyzed by immunoblot using the  
1219 indicated antibodies. All data are one representative experiment of three independent  
1220 experiments, carried out with A549<sup>ACE2</sup> clone 44. (See also Figures S2, S4B&C).

1221

1222 **Figure 7. SARS-CoV-2 and MERS-CoV IFN responses in the lung-derived Calu-3 cells.** Calu-

1223 3 cells were mock treated or infected with SARS-CoV-2, MERS-CoV or MERS-CoV- $\Delta$ NS4ab at  
1224 MOI=5. (A) At 24 or 48 hpi, total RNA was harvested. Expression of *IFNB*, *IFNL1*, *OAS2*, *IFIT1*,  
1225 *IFIH1*, and *CXCL8* mRNA was quantified by RT-qPCR.  $C_T$  values were normalized to 18S rRNA  
1226 to generate  $\Delta C_T$  values ( $\Delta C_T = C_T$  gene of interest -  $C_T$  18S rRNA). Fold change over mock values  
1227 were calculated by subtracting mock infected  $\Delta C_T$  values from virus infected  $\Delta C_T$  values,  
1228 displayed as  $2^{-\Delta(\Delta C_T)}$ . Technical replicates were averaged, the means for each replicate displayed,

1229  $\pm$  SD (error bars). Statistical significance was determined by two-way ANOVA (\*,  $P < 0.05$ ; \*\*,  $P$   
1230  $< 0.01$ ; \*\*\*,  $P < 0.001$ ; \*\*\*\*,  $P < 0.0001$ ; ns = not significant). (B) Viral genome copies per  $\mu$ g of  
1231 total RNA were calculated by RT-qPCR standard curve generated using a digested plasmid  
1232 encoding SARS-CoV-2 nsp12 or plasmid encoding a region of MERS-CoV orf1ab. Values are  
1233 means  $\pm$  SD (error bars). Statistical significance was determined by two-way ANOVA (\*,  $P < 0.05$ ;  
1234 \*\*,  $P < 0.01$ ; ns = not significant). (C) At 24 hpi, Calu-3 cells were lysed and proteins harvested.  
1235 Proteins were analyzed by immunoblotting using the indicated antibodies. All data are one  
1236 representative experiment of three independent experiments. (See also Figure S2).

1237

1238 **Figure 8. SARS-CoV-2 infection leads to activation of RNase L and PKR in A549<sup>ACE2</sup> and**  
1239 **Calu-3 cells.** A549<sup>ACE2</sup> and Calu-3 cells were mock infected or infected with SARS-CoV-2, MERS-  
1240 CoV, or MERS-CoV- $\Delta$ NS4ab at MOI=5. Total RNA was harvested from A549<sup>ACE2</sup> cells (A) or  
1241 Calu-3 cells (B) at 24 and 48 hpi. 28S and 18S rRNA integrity was assessed by Bioanalyzer. 28S  
1242 and 18s rRNA bands are indicated. At 24 hpi, A549<sup>ACE2</sup> cells (C) or Calu-3 cells (D) were lysed  
1243 and proteins harvested for analysis by immunoblotting using the indicated antibodies. All data are  
1244 one representative experiment of three independent experiments. (See also Figure S4D&E).

1245

1246 **Figure 9. Replication of SARS-CoV-2 is restricted by RNase L independent of PKR or**  
1247 **MAVS.** Indicated genes were knocked out (KO) from A549<sup>ACE2</sup> cells using CRISPR-Cas9  
1248 engineering. (A) Indicated cell lines were infected with SARS-CoV-2 at MOI=1. At the indicated  
1249 time points, supernatant was collected and virus quantified by plaque assay on Vero-E6 cells.  
1250 Values represent mean  $\pm$  SD (error bars). Statistical significance was determined by two-way  
1251 ANOVA (\*\*\*\*,  $P < 0.0001$ ; ns = not significant). Data are one representative experiment from at  
1252 least three independent experiments. (B) Indicated cell lines were mock treated or infected with  
1253 SARS-CoV-2 at MOI=1. At 48 hpi, cells were fixed with 4% PFA and stained with 1% crystal violet  
1254 as a marker for live cells. The image is one representative experiment from two independent

1255 experiments. (C) The indicated cell lines were mock infected or infected with SARS-CoV-2 or  
1256 SINV at MOI=1. RNA was harvested 24 hpi (SINV) or 24 and 48 hpi (SARS-CoV-2). Integrity of  
1257 rRNA was assessed by Bioanalyzer. 28S and 18S rRNA bands are indicated. Data are one  
1258 representative of two independent experiments. (D) Mock infected or SARS-CoV-2 (MOI=1)  
1259 infected cells were lysed at 48 hpi and proteins harvested. Proteins were analyzed by  
1260 immunoblotting using the indicated antibodies. Data are from one representative of two  
1261 independent experiments. (See also Figure S5).

1262

1263

1264 **Figure S1. Genome replication in nasal cells, iAT2, and iCM.** Nasal (A) and iAT2 cells (B)  
1265 were infected at MOI=5 with SARS-CoV-2, and (C) iCM at MOI=1 with SARS-CoV-2 or SINV.  
1266 Total RNA was harvested at 48 hpi (SARS-COV-2) or 16 hpi (SINV) for iAT2 and iCM cells and  
1267 120 hpi for nasal cells. Viral genome copies per ug of harvested RNA were calculated by RT-  
1268 qPCR standard curve generated using a digested plasmid encoding SARS-CoV-2 nsp12. Values  
1269 are means  $\pm$  SD (error bars). For SINV (C), cycle threshold ( $C_T$ ) values of SINV nsp4 polymerase  
1270 sequences were normalized to 18S rRNA to generate  $\Delta C_T$  values ( $\Delta C_T = C_T$  gene of interest -  $C_T$   
1271 18S rRNA). Technical triplicates were averaged and displayed using the equation  $2^{-(\Delta C_T)}$ . Data are  
1272 from one representative experiment of two independent experiments.

1273

1274 **Figure S2. Host basal mRNA expression of uninfected cells.** Total RNA was harvested from  
1275 mock treatment from all indicated cell types after 24 hours incubation. mRNA expression levels  
1276 of *IFNB*, *IFNL1*, *OAS2*, *IFIT1*, *IFHI1*, and *CXCL8* were quantified by RT-qPCR.  $C_T$  values were  
1277 normalized to 18S rRNA to generate  $\Delta C_T$  values ( $\Delta C_T = C_T$  gene of interest -  $C_T$  18S rRNA). (A)  
1278 Basal level of gene expression is displayed for nasal cells, iAT2 and iCM, Calu-3 cells and two  
1279 clones of A549<sup>ACE2</sup> cells, displayed as  $2^{-\Delta C_T}$ . (B) Fold expression over A549<sup>ACE2</sup> C44 values were

1280 calculated by subtracting  $\Delta C_T$  values from the indicated cell line from A549<sup>ACE2</sup> C44  $\Delta C_T$  values,  
1281 displayed as  $2^{-\Delta(\Delta C_T)}$ . Biological replicates were averaged and values are means  $\pm$  SD (error bars).  
1282 Data were generated from at least two independent experiments.

1283

1284 **Figure S3. ACE2 protein expression in A549<sup>ACE2</sup> and Calu-3 cell lines.** Parental A549 cells,  
1285 two A549<sup>ACE2</sup> clones, and Calu-3 cells were grown in culture before lysis and protein harvest.  
1286 Protein expression was analyzed by immunoblotting using the indicated antibodies.

1287

1288 **Figure S4. SARS-CoV-2 replication and host responses in a second lung epithelia-derived**  
1289 **A549<sup>ACE2</sup> cell line clone (C34).** (A) Vero-E6 or A549<sup>ACE2</sup> cells were infected with SARS-CoV-2 at  
1290 MOI=1 and supernatant harvested at indicated times post infection. Infectious virus was quantified  
1291 by plaque assay on Vero-E6 cells. Values are means  $\pm$  SD (error bars). (B) A549<sup>ACE2</sup> cells (C34)  
1292 were mock infected or infected with SARS-CoV-2 or SINV at MOI=5 and total RNA total RNA  
1293 harvested at 24 (SINV) or 24 and 48 (SARS-CoV-2) hpi. Expression of *IFNB*, *IFNL1*, *OAS2*, *IFIT1*,  
1294 *IFIH1*, and *CXCL8* mRNA was quantified by RT-qPCR.  $C_T$  values were normalized to 18S rRNA  
1295 to generate  $\Delta C_T$  values ( $\Delta C_T = C_T$  gene of interest -  $C_T$  18S rRNA). Fold change over mock values  
1296 were calculated by subtracting mock infected  $\Delta C_T$  values from virus infected  $\Delta C_T$  values,  
1297 displayed as  $2^{-\Delta(\Delta C_T)}$ . Statistical significance for each gene was determined by one-way ANOVA  
1298 (\*\*\*,  $P < 0.001$ ; \*\*\*\*,  $P < 0.0001$ ; ns = not significant). Technical replicates were averaged, the  
1299 means for each replicate displayed,  $\pm$  SD (error bars). (C&D) A549<sup>ACE2</sup> cells were infected at  
1300 MOI=5, lysed at 24 hpi, and proteins harvested for analysis by immunoblotting using the indicated  
1301 antibodies. (E) A549<sup>ACE2</sup> cells were infected at MOI=1 (SINV) or MOI=5 (SARS-CoV-2) and total  
1302 RNA harvested at 24 (SINV) or 24 and 48 (SARS-CoV-2) hpi. Integrity of rRNA was assessed by  
1303 Bioanalyzer. 28S and 18s rRNA bands are indicated. All data are representative of two or three  
1304 independent experiments.

1305

1306 **Figure S5. Protein expression in A549<sup>ACE2</sup> cells.** (A) A549<sup>ACE2</sup> KO cell lines were grown in  
1307 culture with or without 1000U IFN- $\alpha$  treatment for 24 hours. Cells were lysed and proteins  
1308 harvested for analysis by immunoblotting using the indicated antibodies. (B) Mock infected or  
1309 SINV (MOI=1) infected A549<sup>ACE2</sup> WT or KO cells were lysed at 24 hpi and proteins harvested.  
1310 Proteins were analyzed by immunoblotting using the indicated antibodies. All data are from one  
1311 representative of two independent experiments

1312

1313

# Figure 1

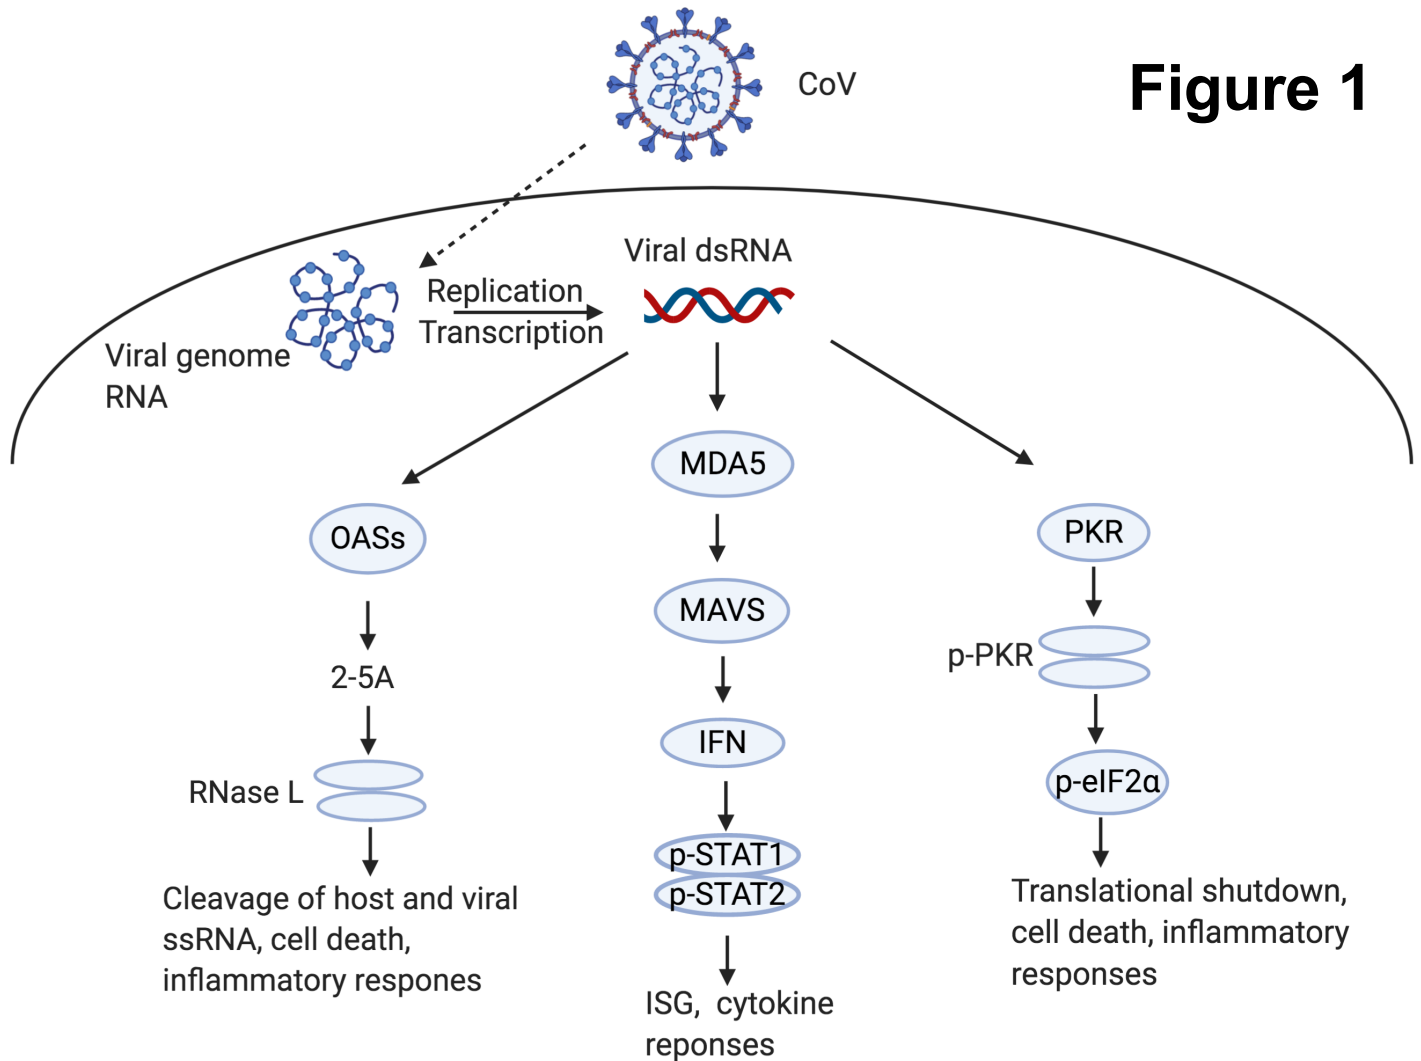

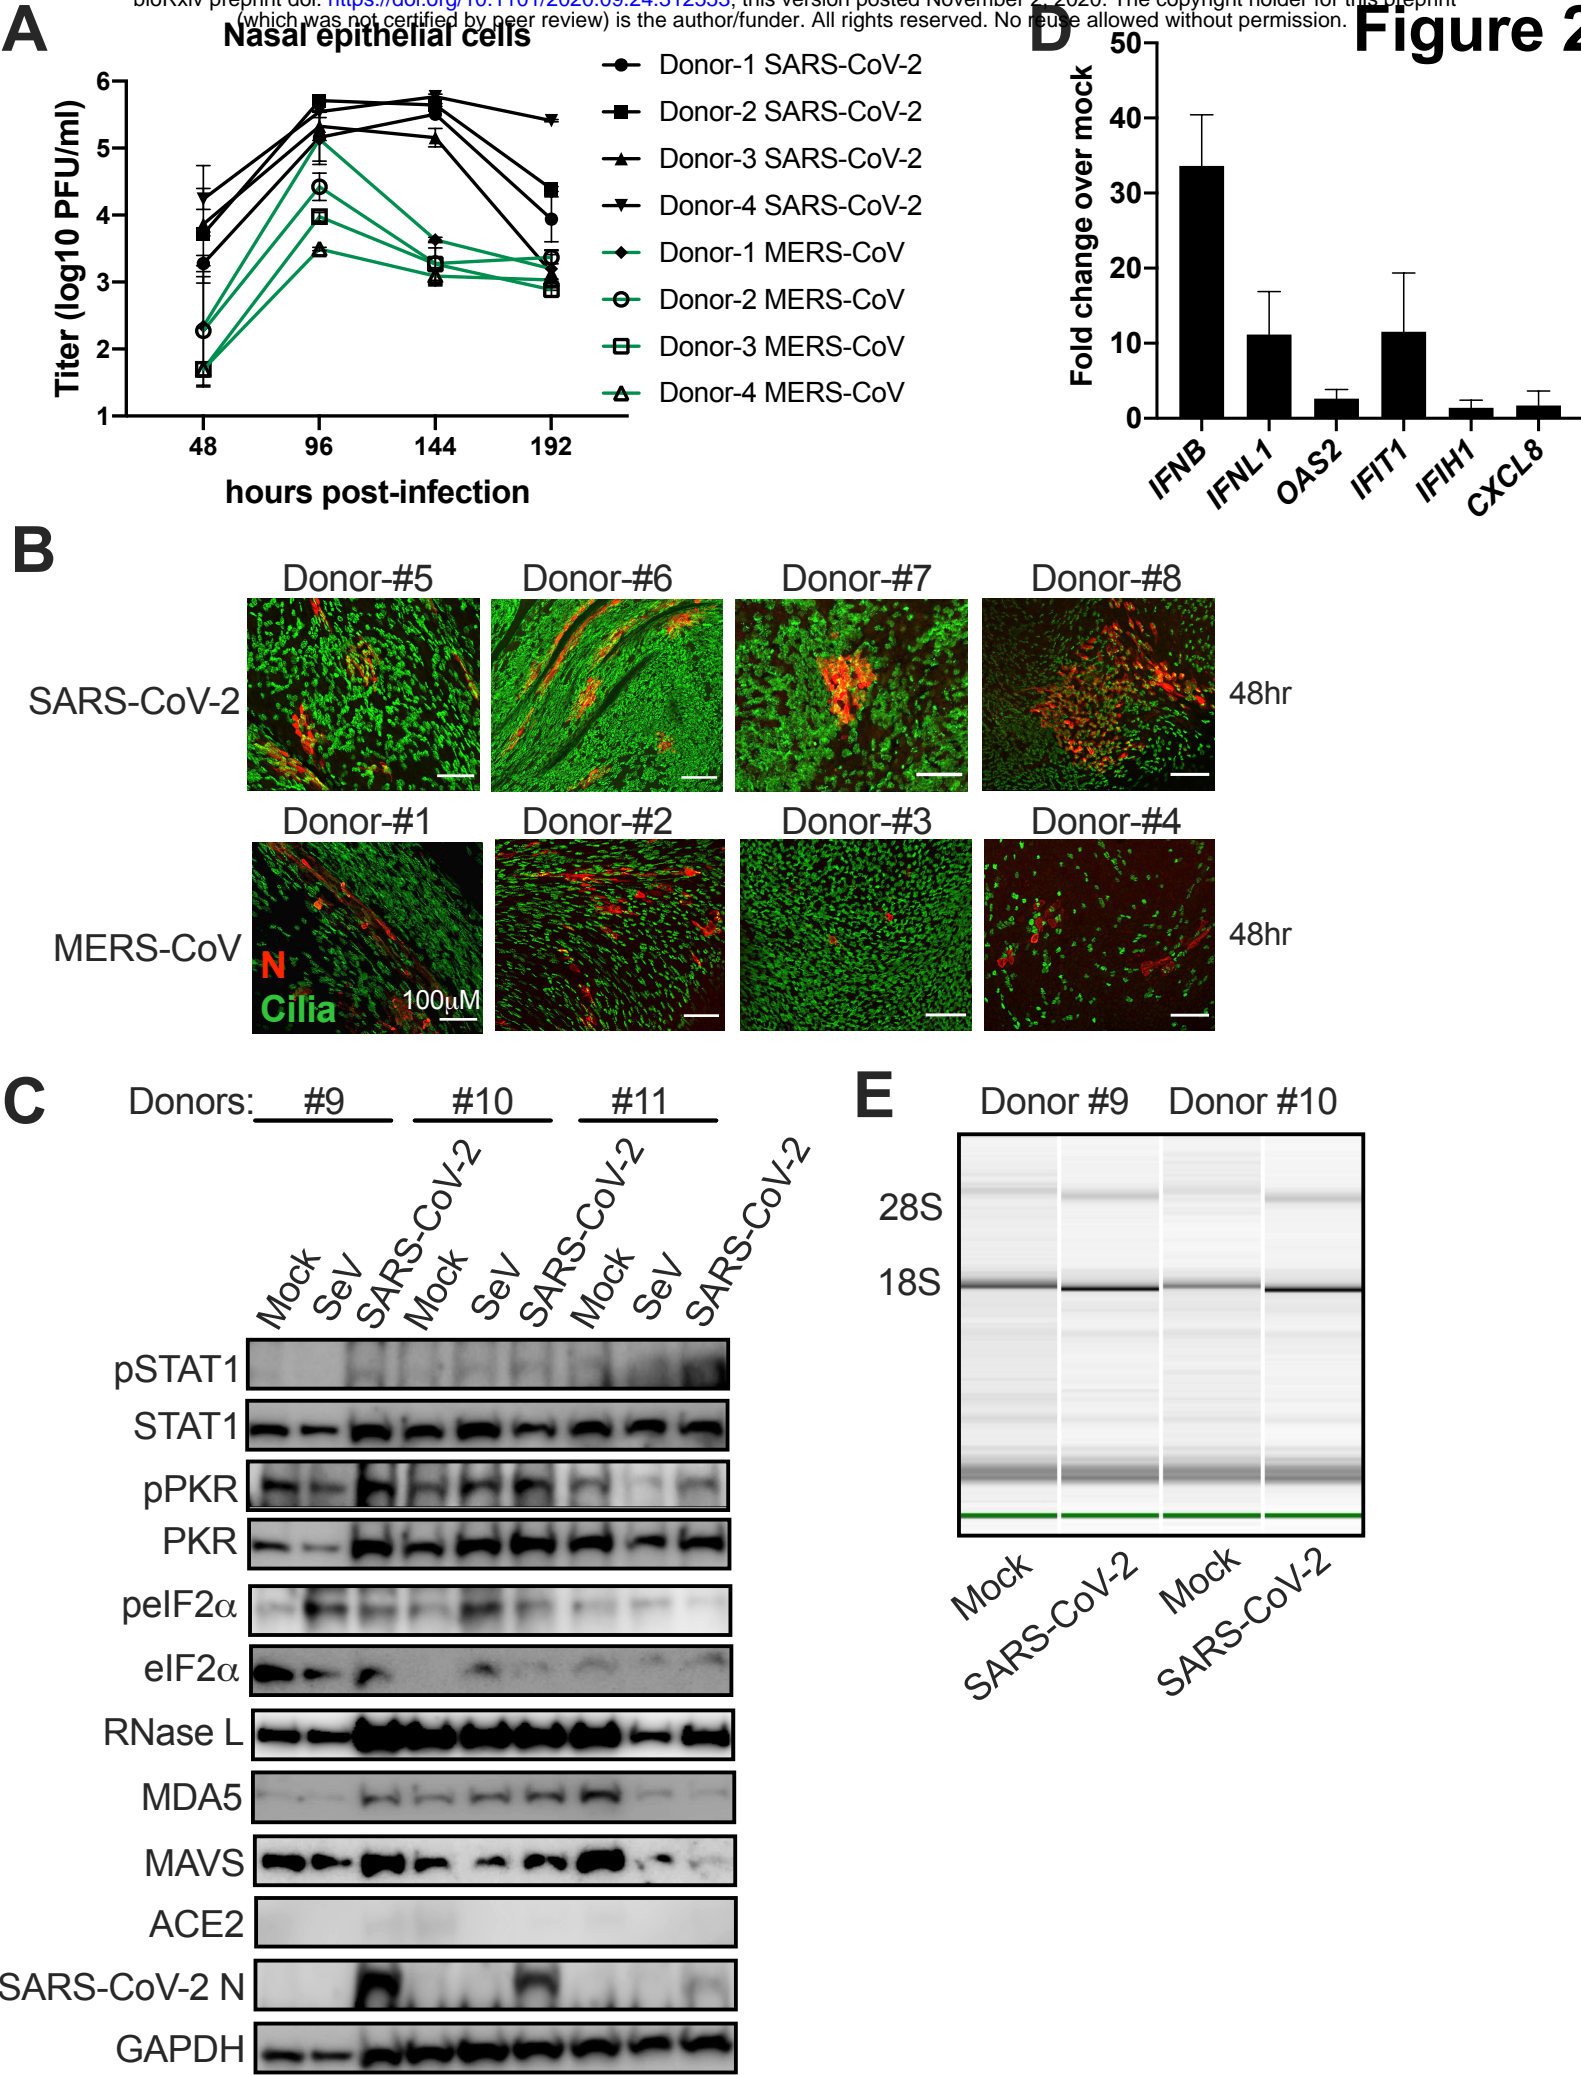



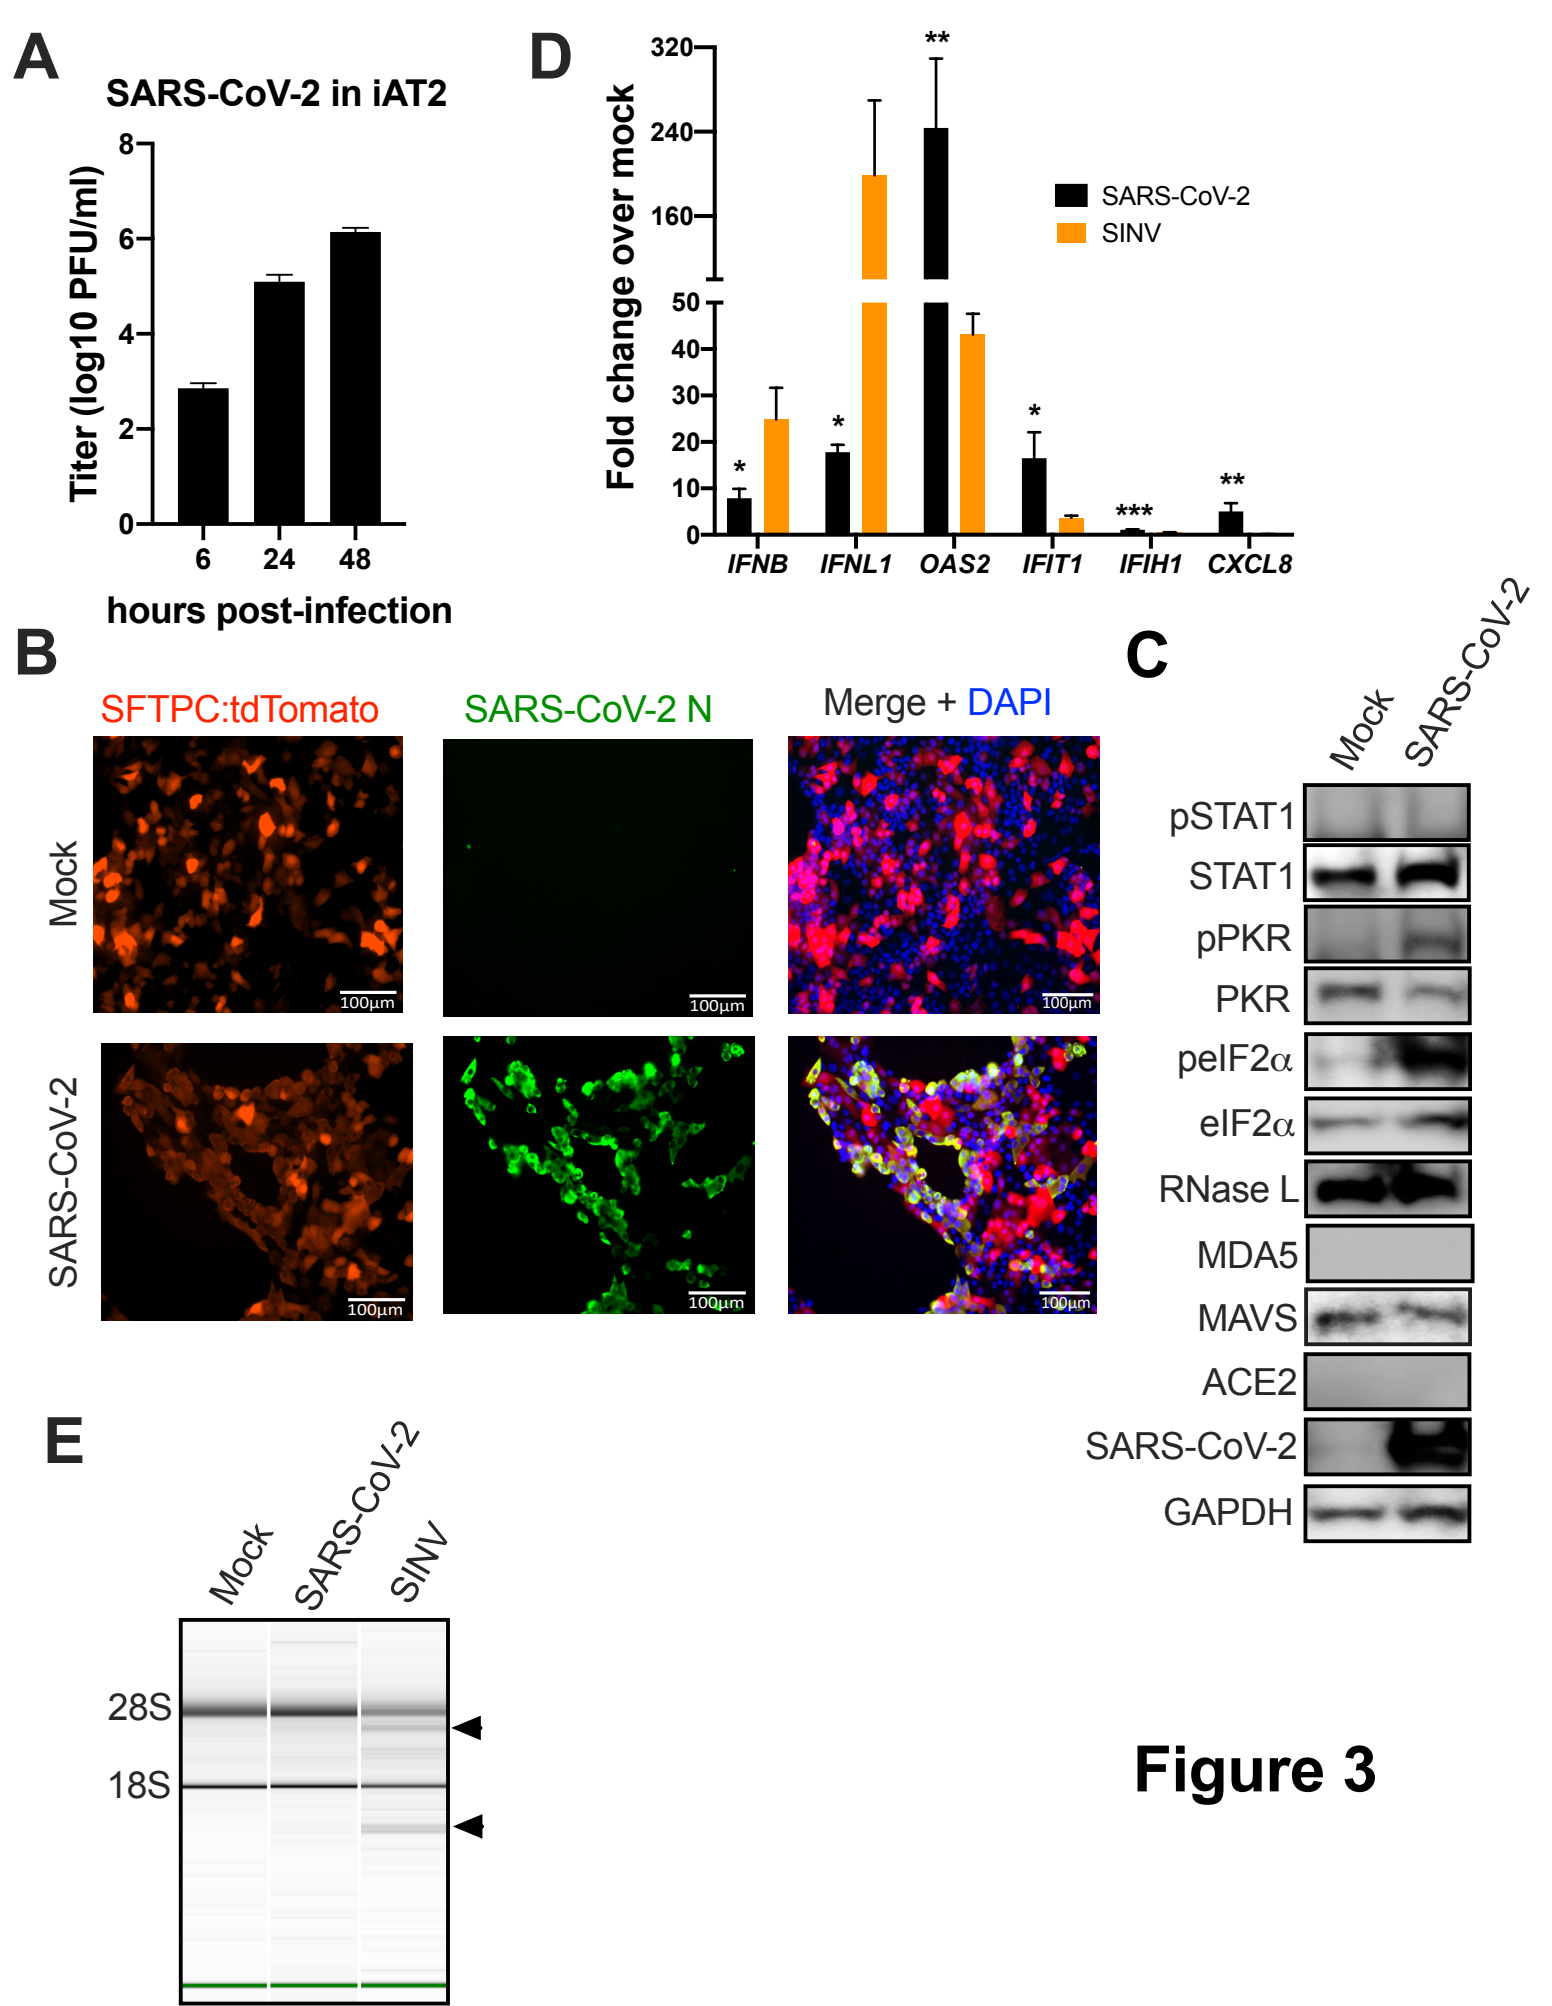

**Figure 3**

**A**

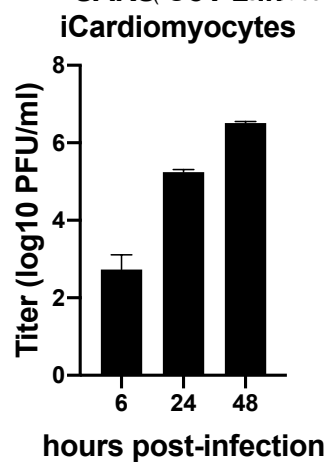

**D**

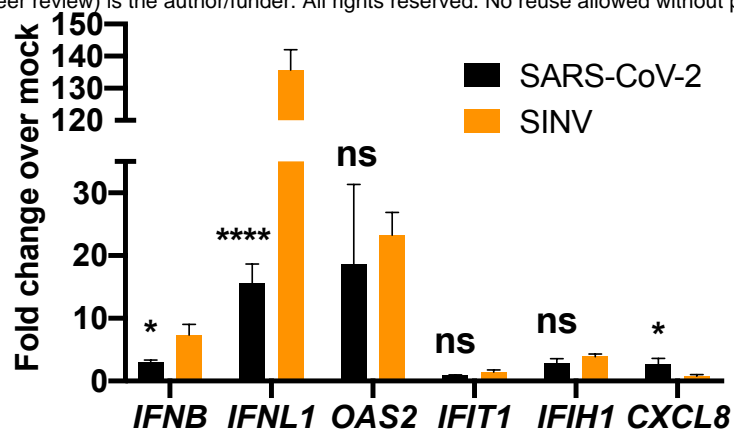

**B**

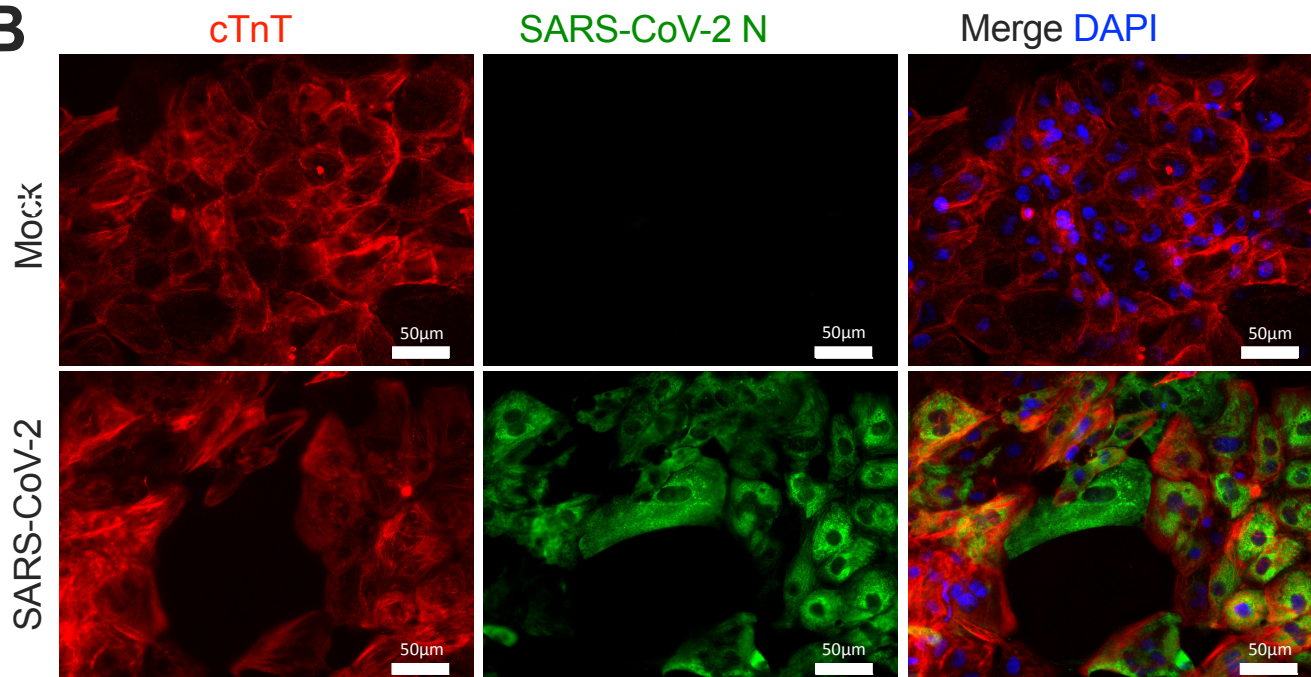

**C**

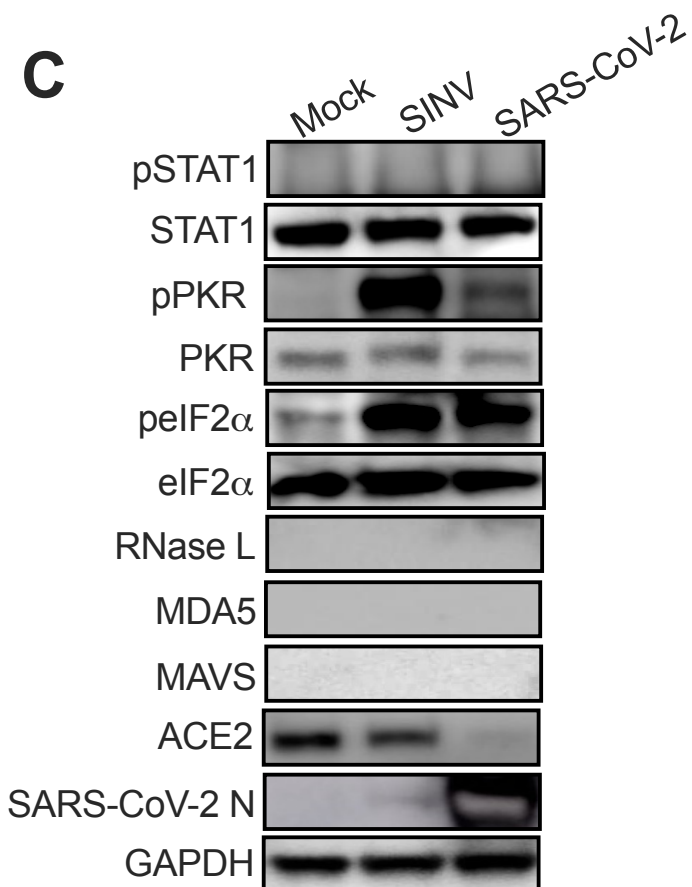

**E**

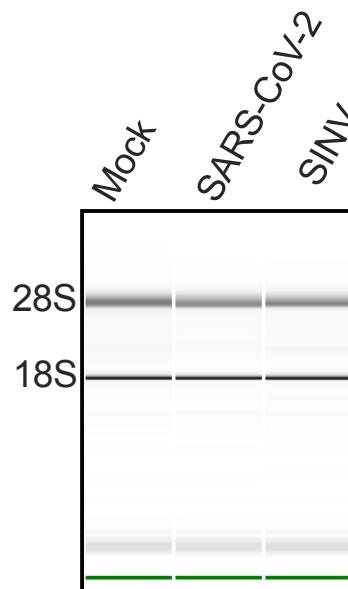

**Figure 4**

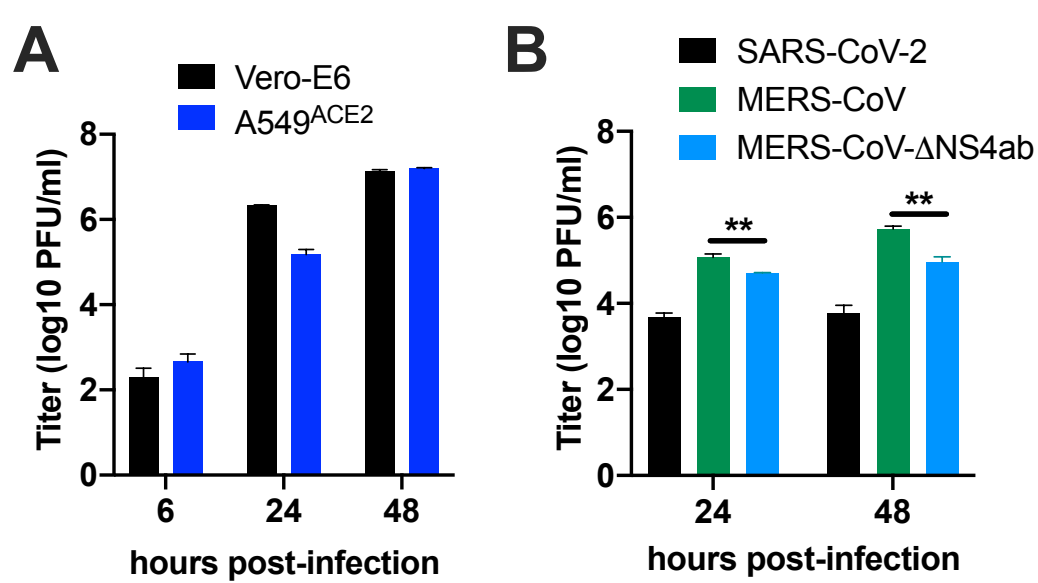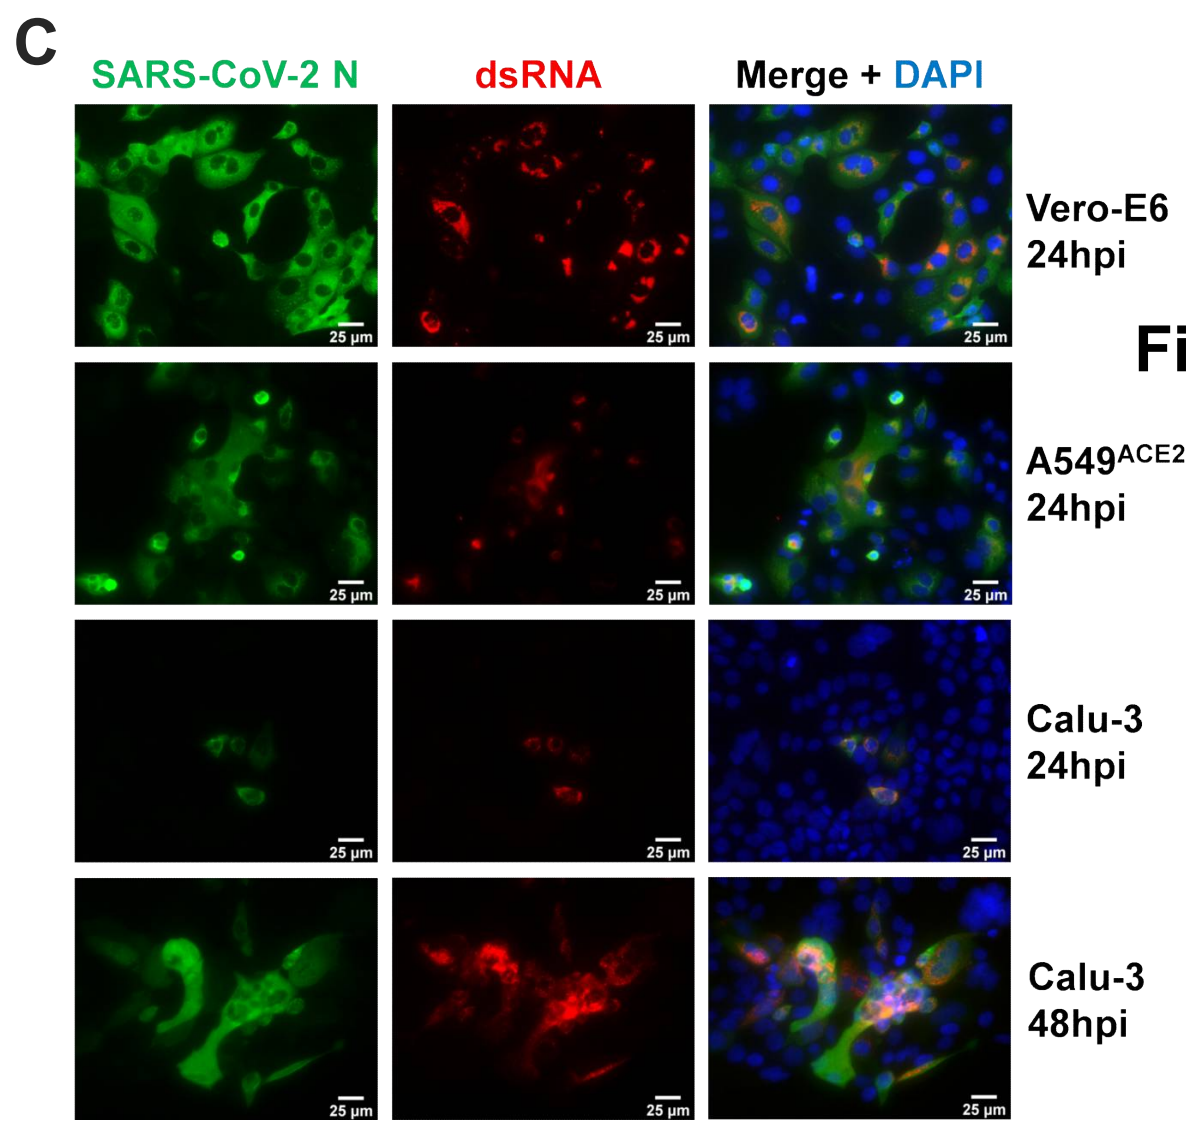

**Figure 5**

**A**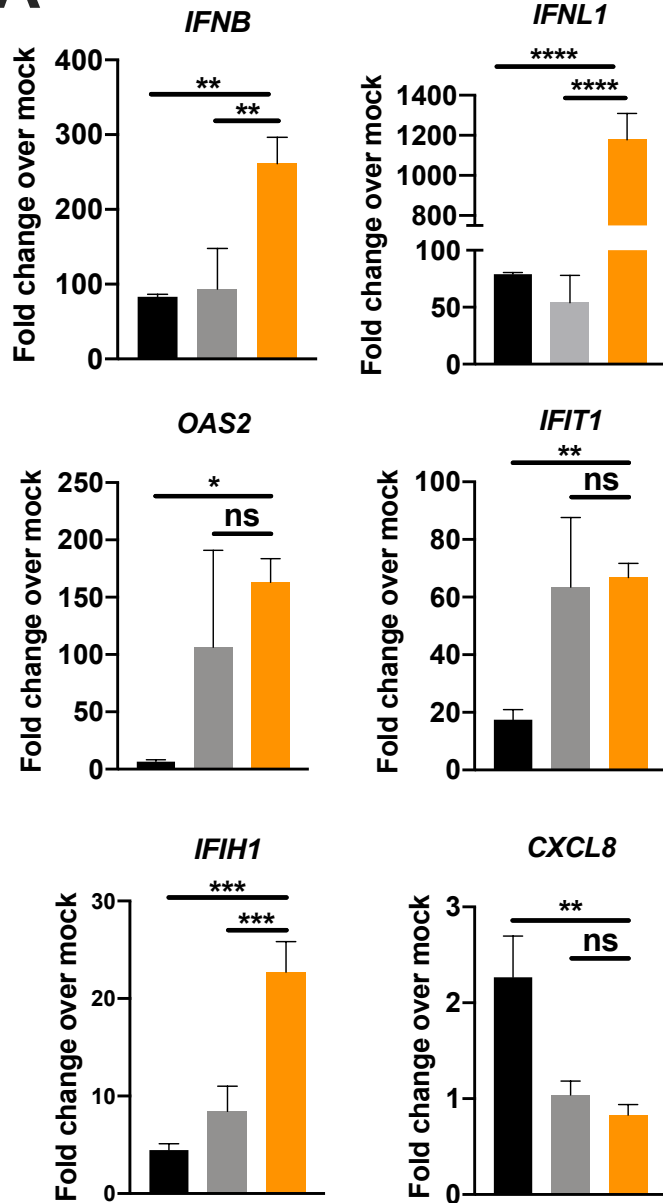**B**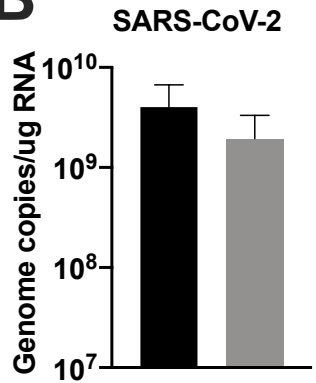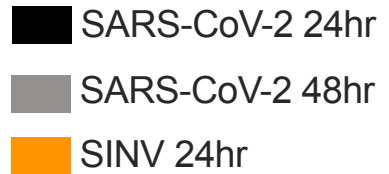**C**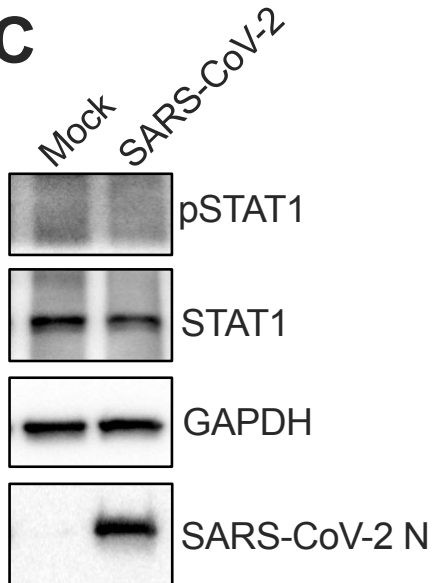**Figure 6**

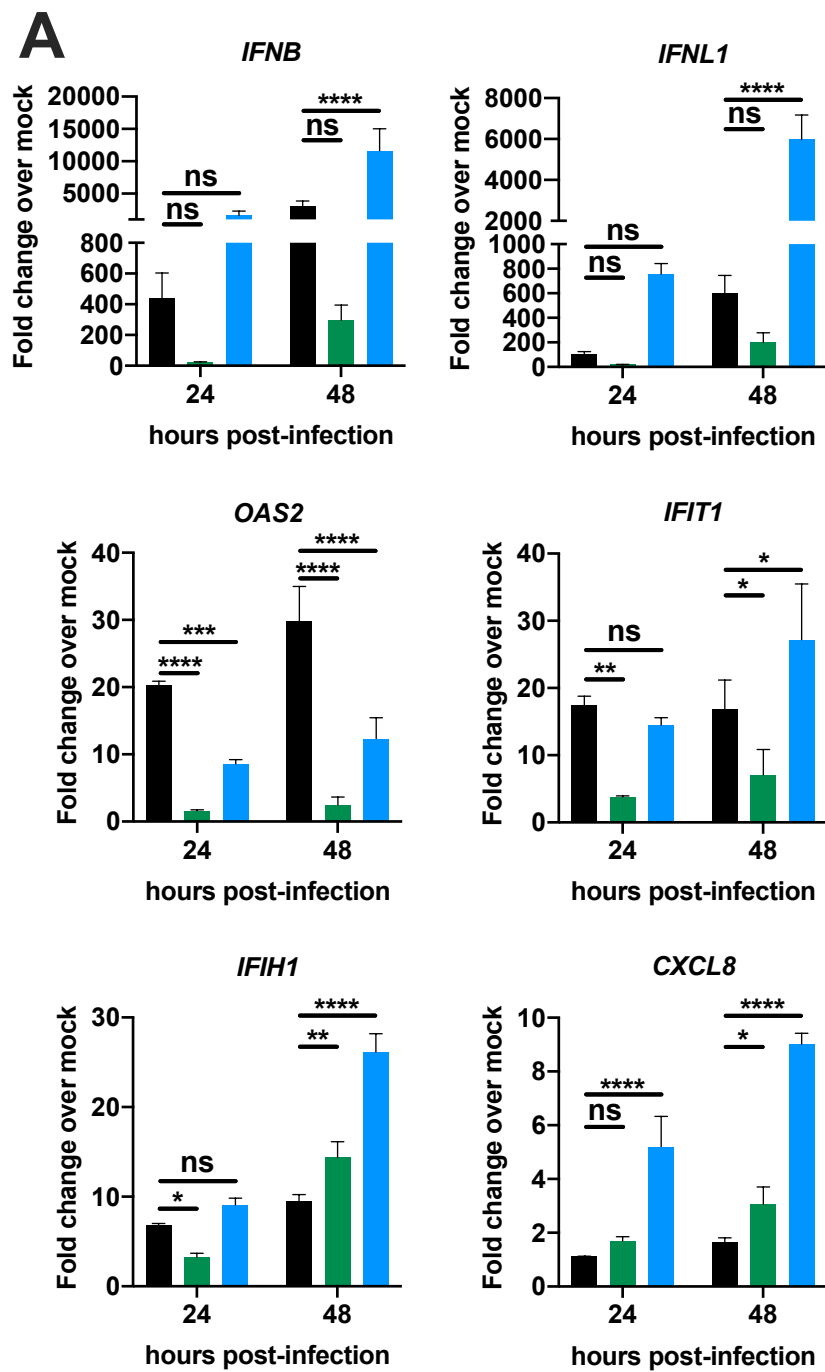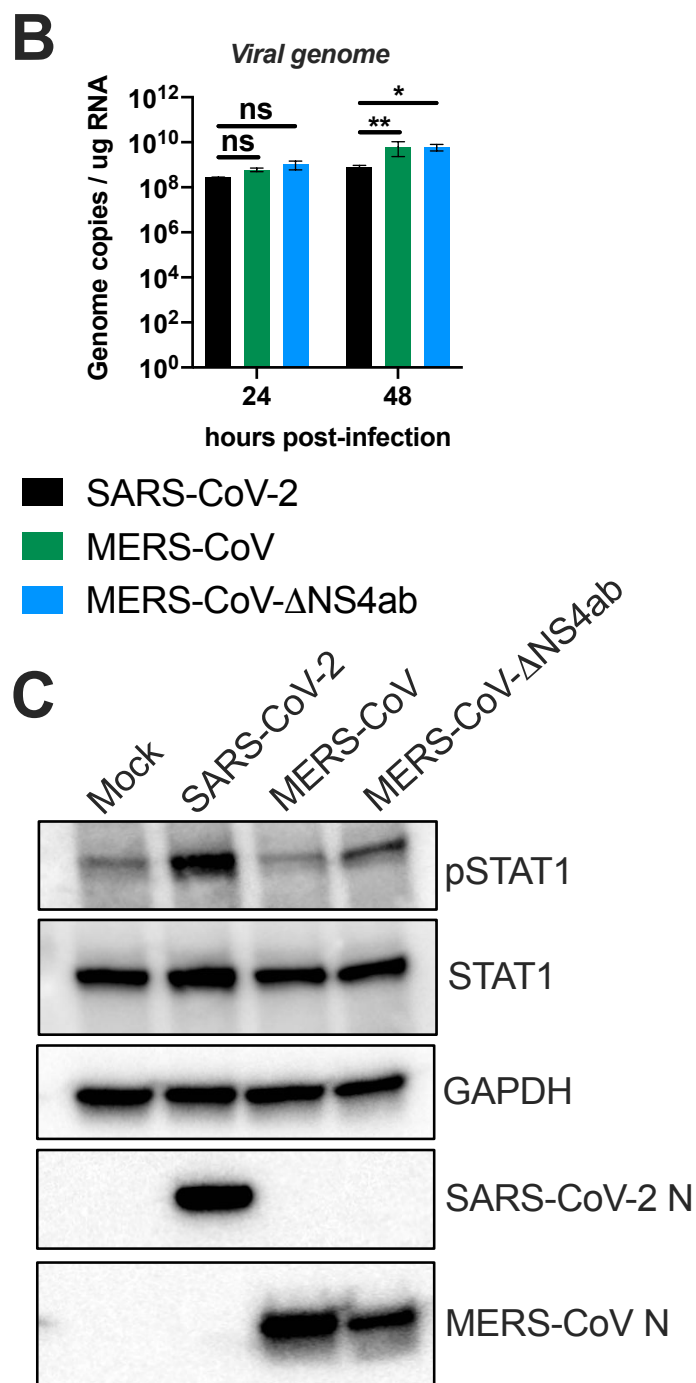

**Figure 7**

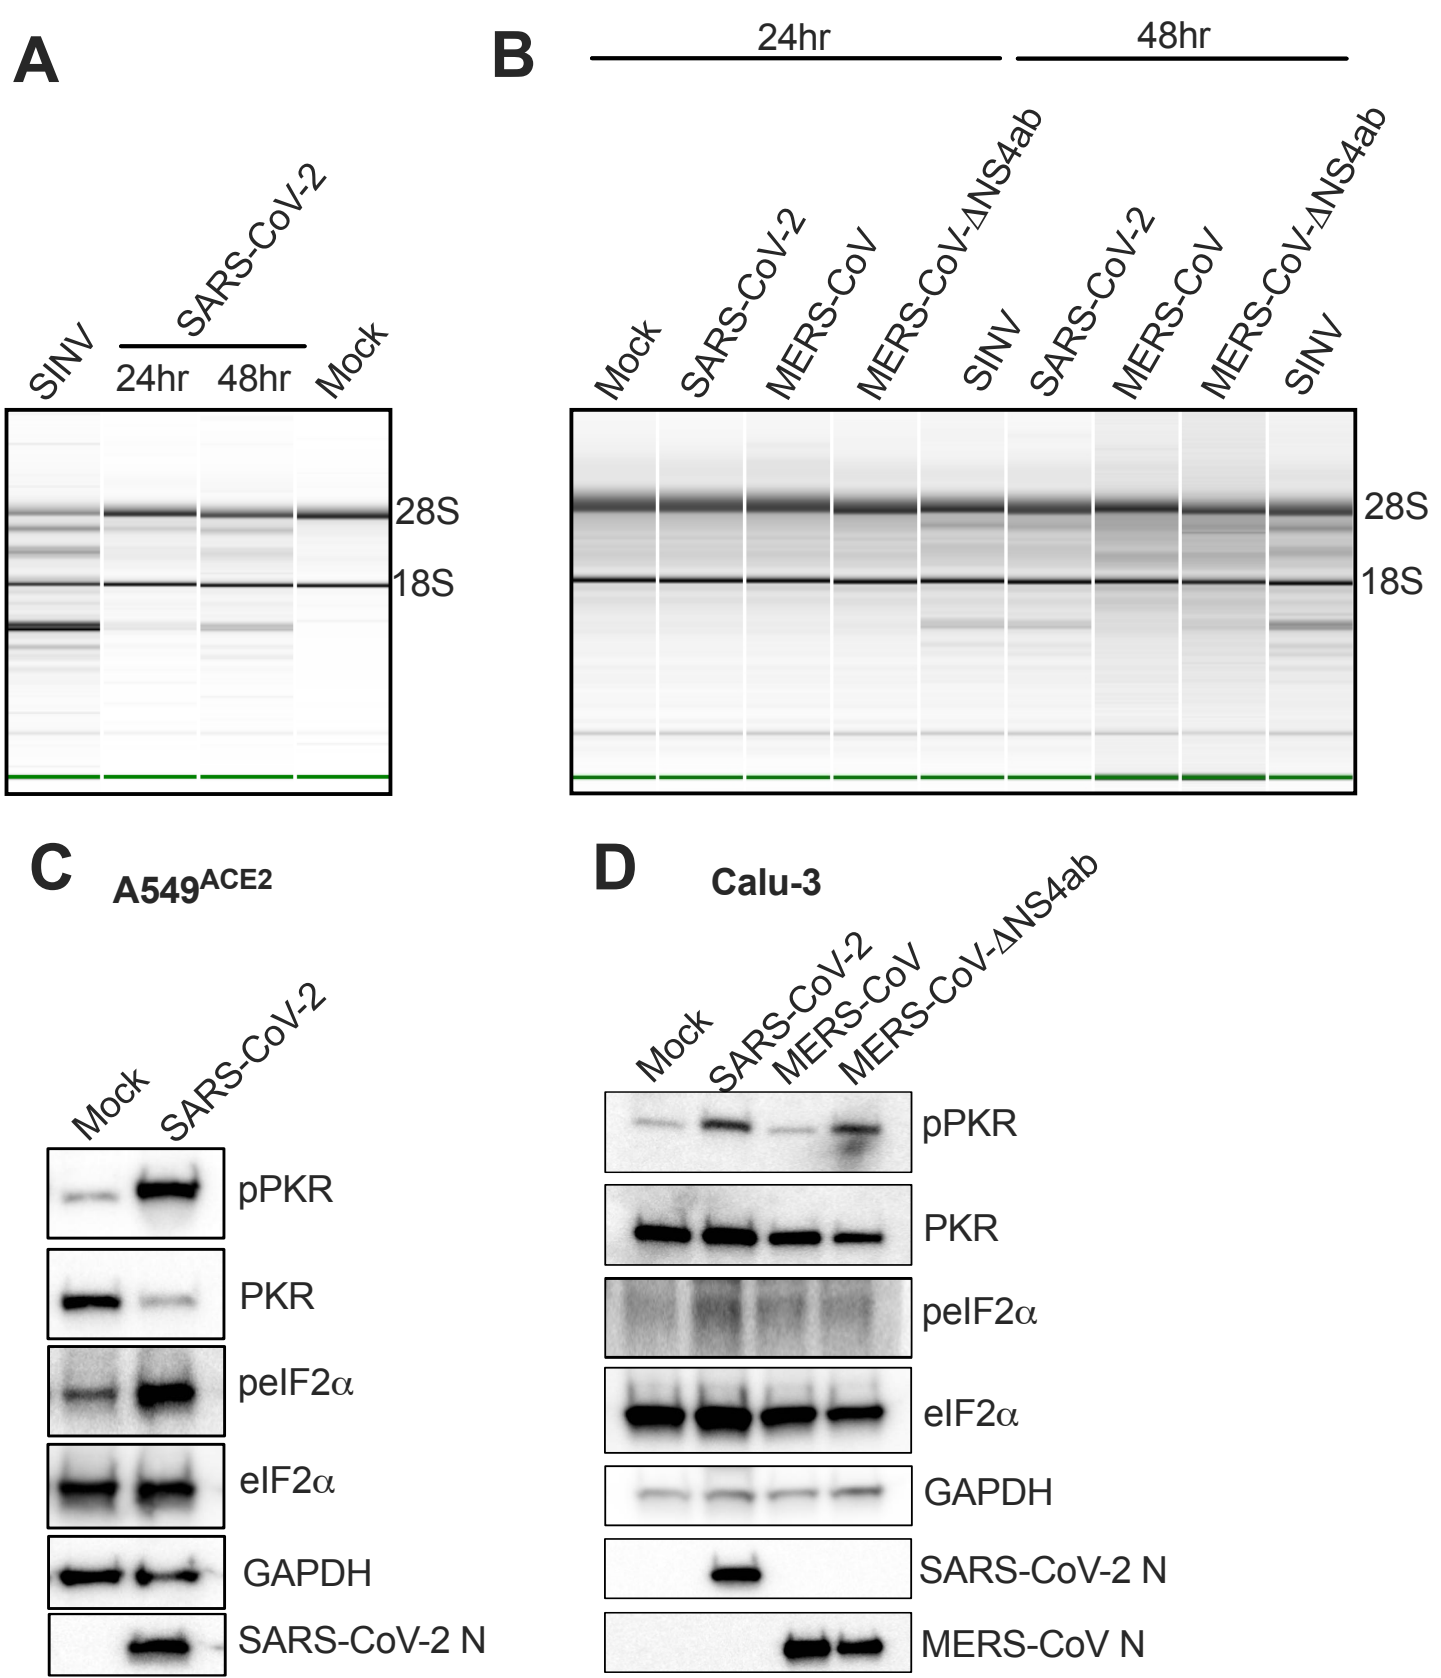

**Figure 8**



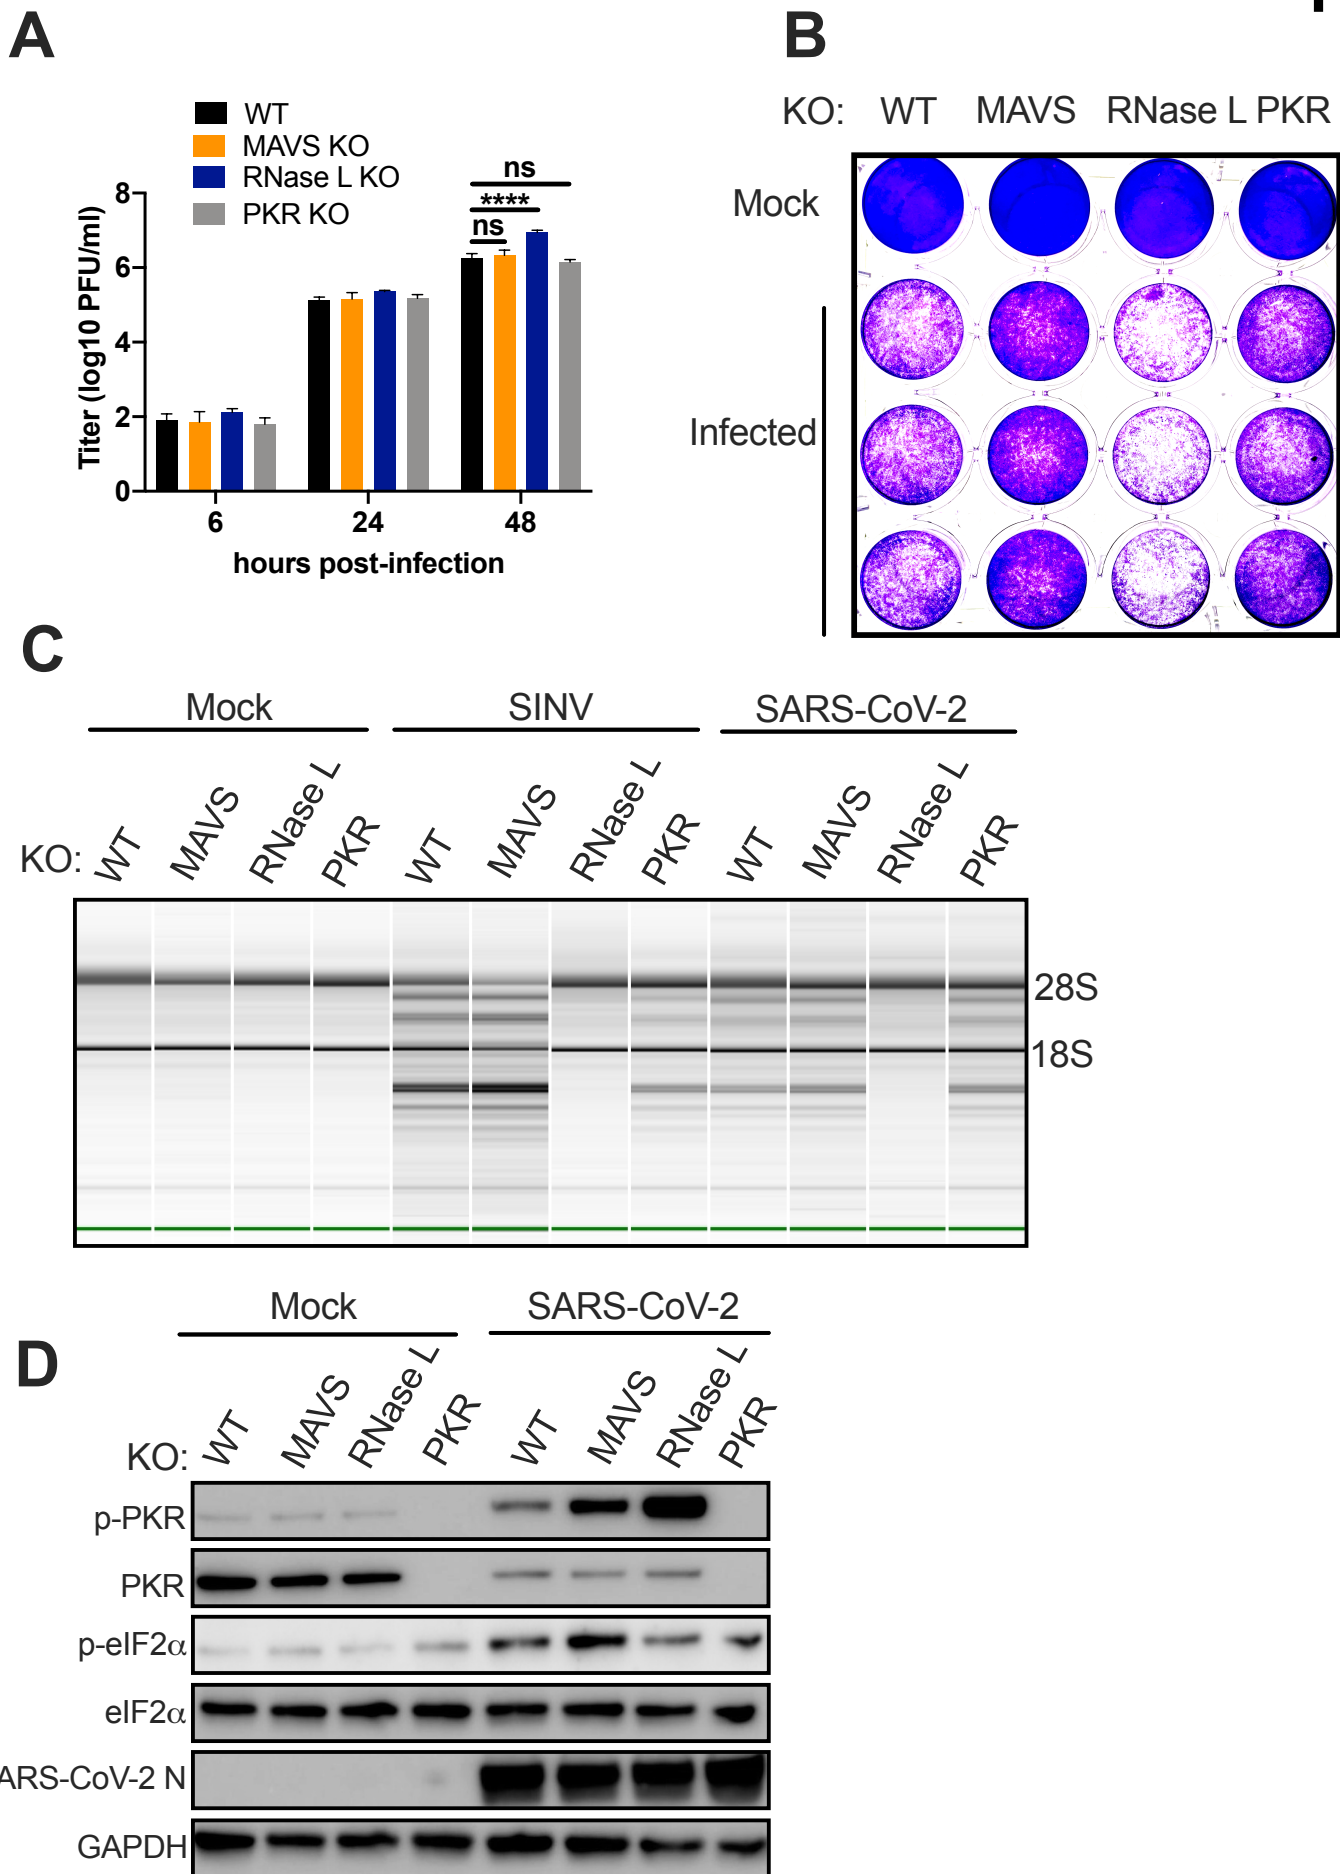

**Figure 9**



**A** SARS-CoV-2  
in nasal cells

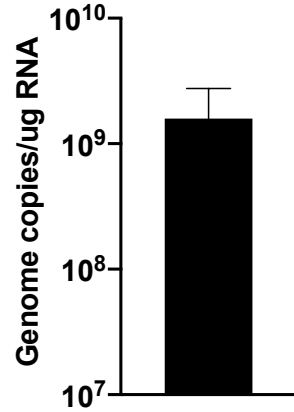

**B** SARS-CoV-2  
in iAT2 cells

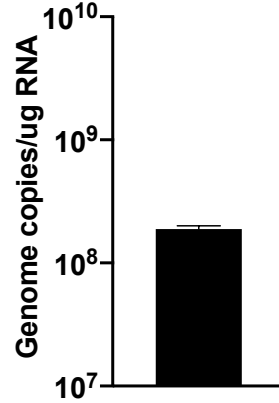

**C** SARS-CoV-2  
in iCM

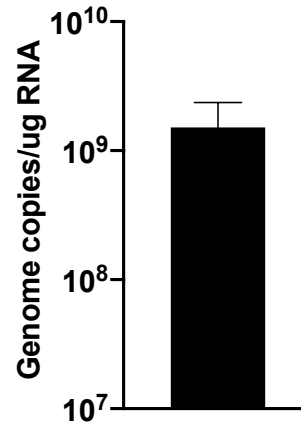

SINV nsP4  
in iCM

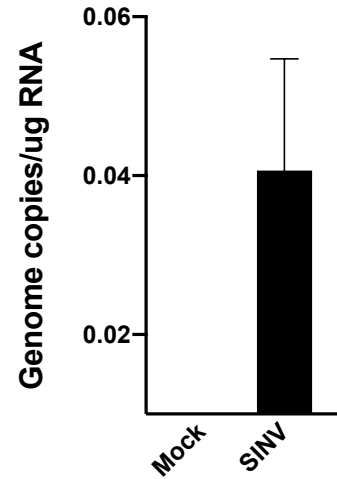

**Figure S1**

**A**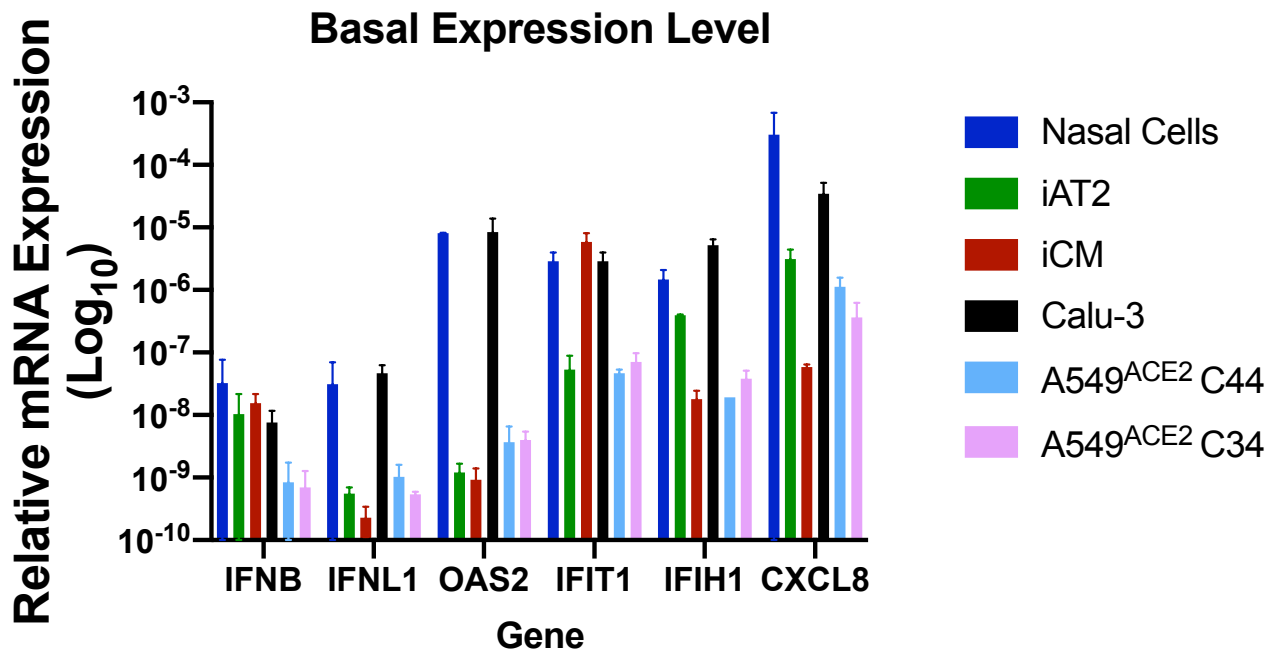**B**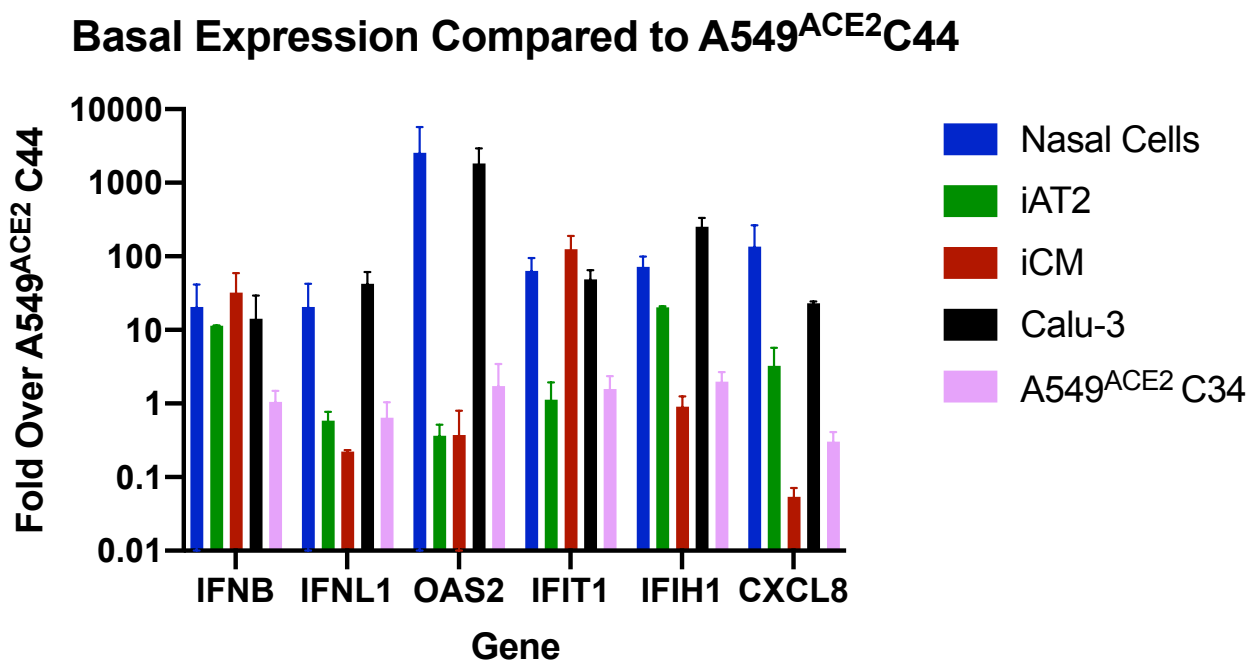**Figure S2**

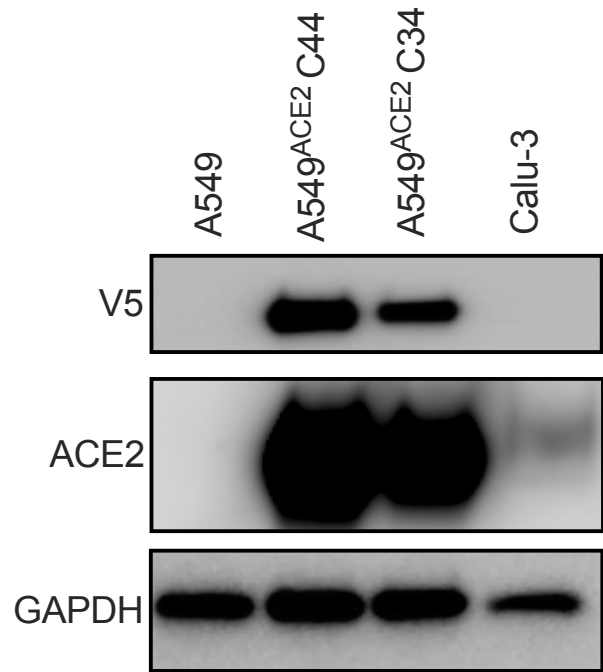

**Figure S3**

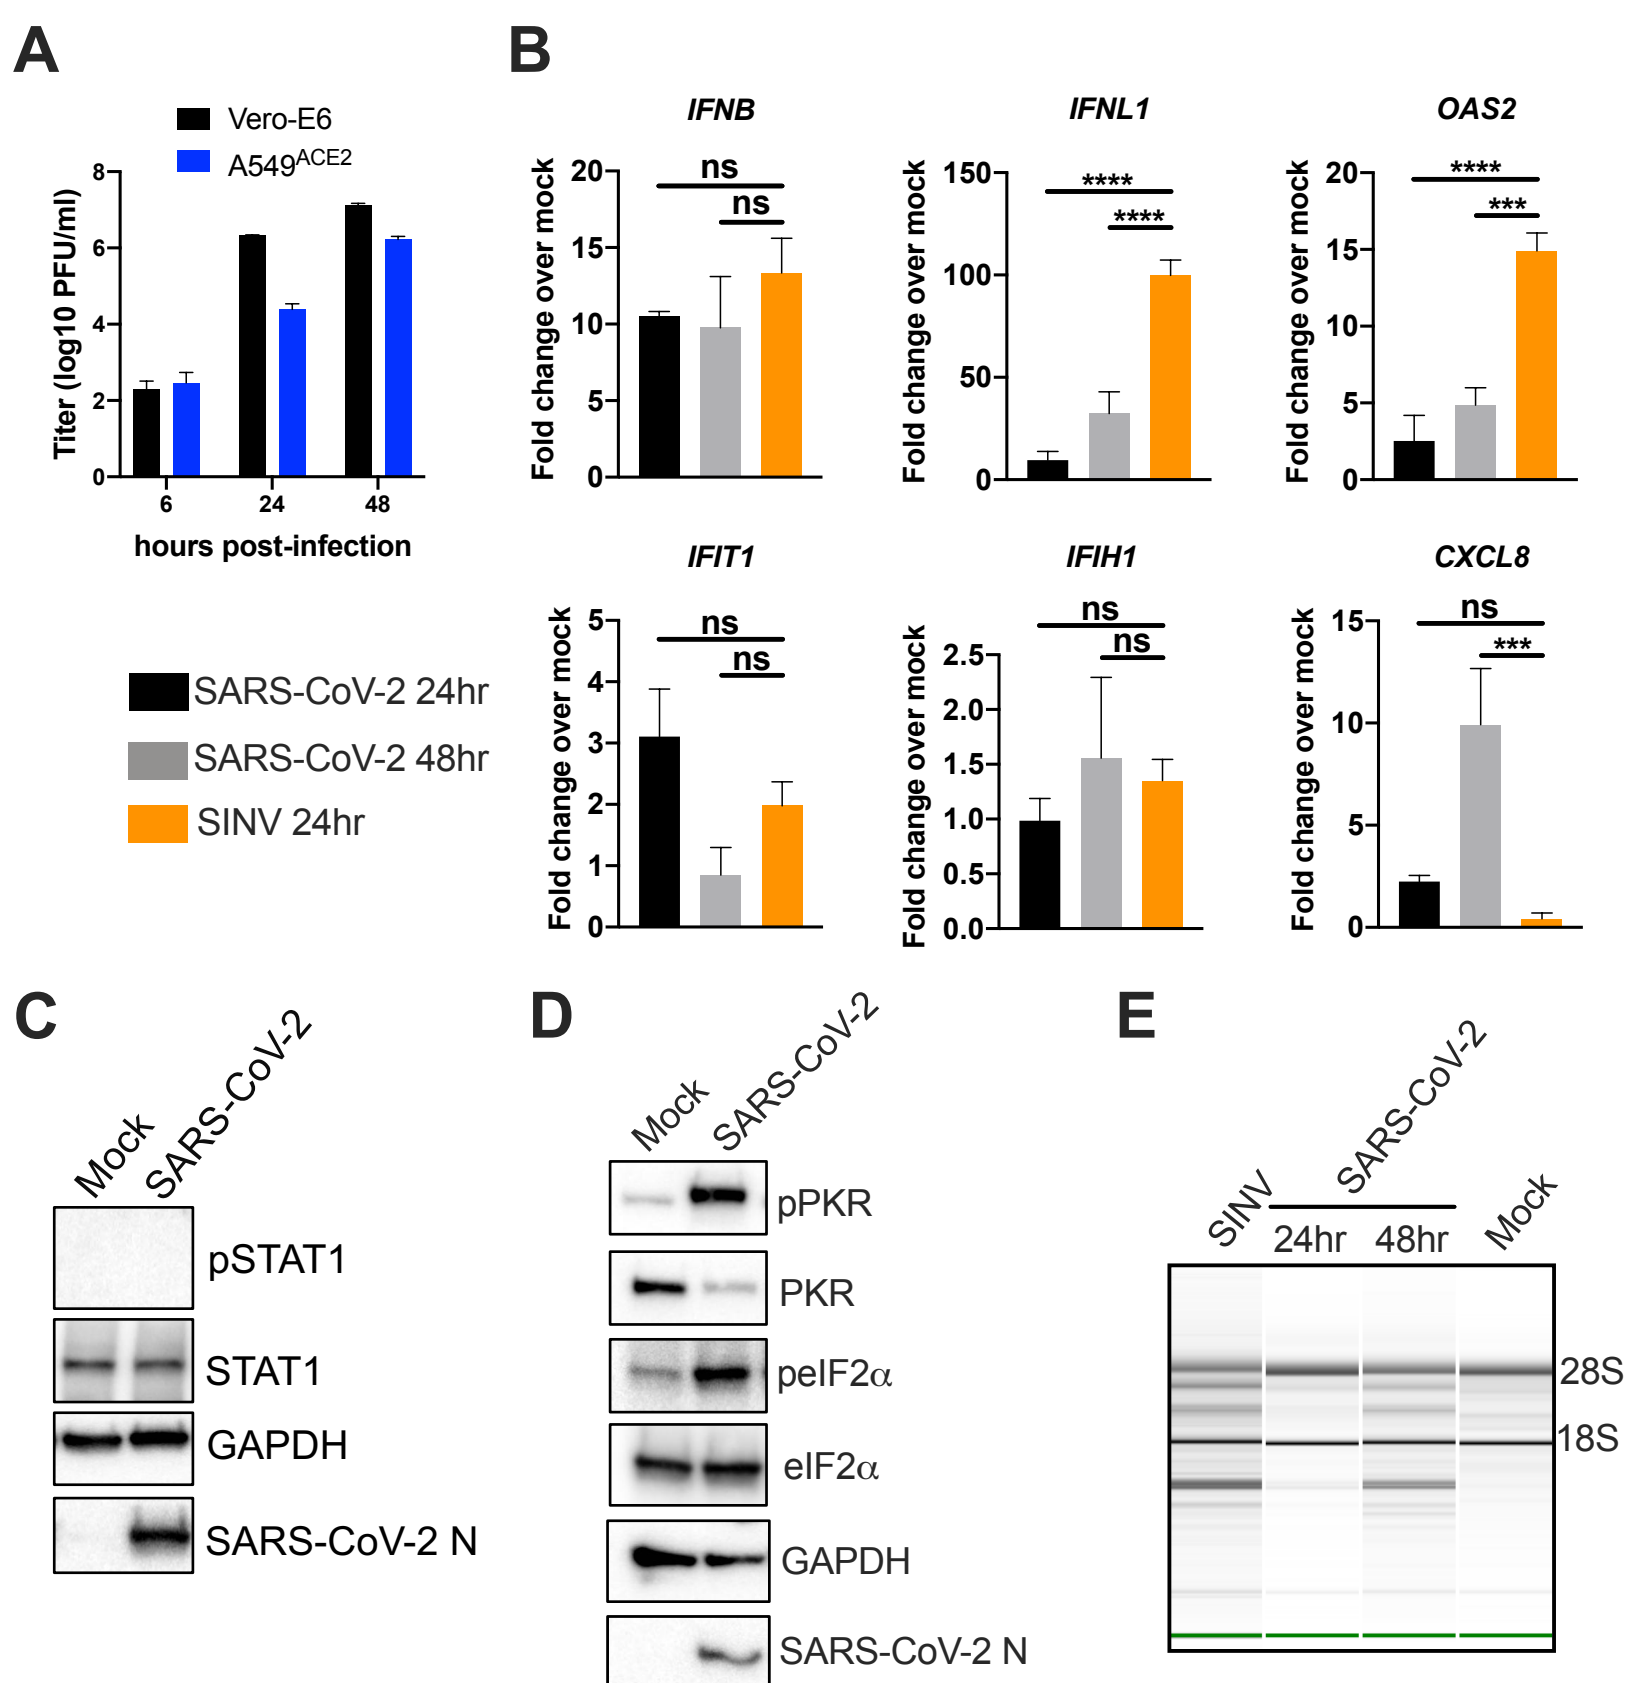

**Figure S4**

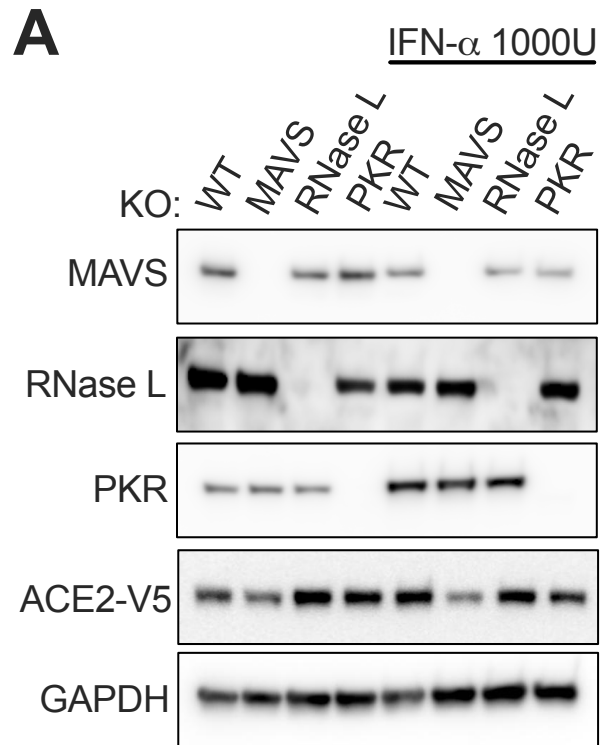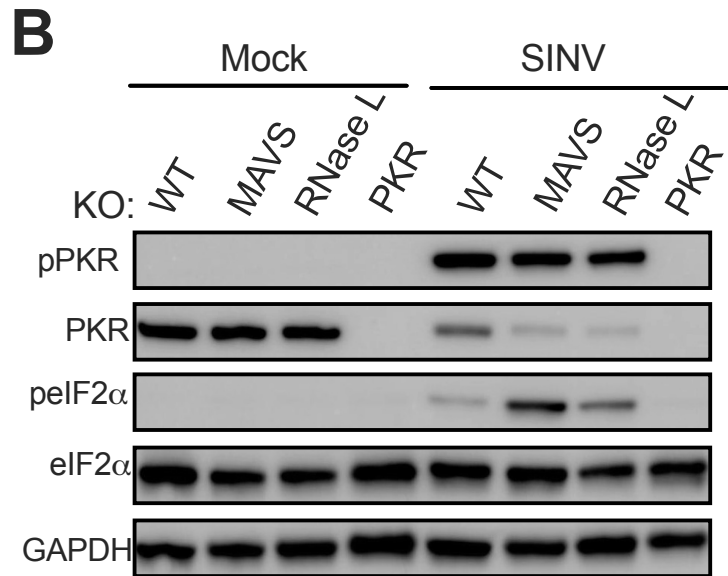

**Figure S5**
